# Supplementary material for: Hsa-circRNA11783-2 in peripheral blood is correlated with coronary artery disease and type 2 diabetes mellitus
Source: PubMed Central journal article supplement — Diab Vasc Dis Res. 2017 Aug 4;14(6):510–5. doi: 10.1177/1479164117722714 (PMC5652644; doi:10.1177/1479164117722714), 2017-08-04
Supplement: Suppl_table_1-4_and_8.pdf [file Suppl_table_1-4_and_8.pdf]

**Supplementary Table 1. The clinical and demographic characteristics of the first cohort.**

|                         | <b>Control<br/>group<br/>(n=6)</b> | <b>CAD<br/>group<br/>(n=6)</b> | <b>T2DM<br/>group<br/>(n=6)</b> | <b>CAD and T2DM<br/>group<br/>(n=6)</b> | <b>p value</b> |
|-------------------------|------------------------------------|--------------------------------|---------------------------------|-----------------------------------------|----------------|
| Male gender             | 3 (50%)                            | 3 (50%)                        | 3 (50%)                         | 3 (50%)                                 | 1              |
| Age                     | 60±2.3                             | 61.7±7.9                       | 62.3±6.2                        | 63.2±2.6                                | 0.766          |
| Hypertension            | 1 (16.7%)                          | 2 (33.3%)                      | 2 (33.3%)                       | 1 (16.7%)                               | 0.828          |
| Smoker                  | 1 (16.7%)                          | 1 (16.7%)                      | 1 (16.7%)                       | 2 (33.3%)                               | 0.86           |
| BMI(kg/m <sup>2</sup> ) | 23.3±2.1                           | 23.8±1.4                       | 24.7±1.2                        | 23.2±2.3                                | 0.449          |
| TC(mmol/L)              | 3.5±0.9                            | 4.3±0.9                        | 3.9±1.1                         | 3.6±0.9                                 | 0.538          |
| TG(mmol/L)              | 0.9±0.2                            | 1.1±0.4                        | 1.4±0.6                         | 1.0±0.3                                 | 0.172          |
| HDL(mmol/L)             | 1.3±0.3                            | 0.9±0.2                        | 1.1±0.2                         | 1.0±0.2                                 | 0.071          |
| LDL(mmol/L)             | 1.8±0.7                            | 2.1±0.5                        | 2.1±0.9                         | 1.8±0.6                                 | 0.79           |
| ALT(U/L)                | 36.3±17.8                          | 30.0±11.8                      | 33.7±17.9                       | 31.8±11.5                               | 0.9            |
| AST(U/L)                | 23.5±3.8                           | 28.3±10.0                      | 19.8±7.3                        | 24.7±7.0                                | 0.282          |
| Scr(μmol/L)             | 58.7±3.9                           | 67.0±7.0                       | 60.0±10.7                       | 64.8±10.4                               | 0.301          |
| FT4I(pmol/L)            | 14.4±2.7                           | 15.0±1.1                       | 14.1±1.9                        | 14.4±1.6                                | 0.851          |
| HbA1c(%)                | 5.4±0.1                            | 5.4±0.2                        | 6.9±0.7                         | 7.0±0.4                                 | 0.001          |
| GLU(mmol/L)             | 5.0±0.4                            | 4.7±0.4                        | 9.8±2.0                         | 9.0±1.0                                 | <0.001         |
| OGTT 2h(mmol/L)         | 7.0±0.4                            | 6.9±0.2                        | 13.8±1.3                        | 15.2±2.5                                | 0.001          |

**Supplementary Table 2. The clinical and demographic characteristics of the second cohort.**

|                         | <b>Control group</b> | <b>CAD group</b> | <b>T2DM group</b> | <b>p value</b> |
|-------------------------|----------------------|------------------|-------------------|----------------|
|                         | <b>(n=20)</b>        | <b>(n=20)</b>    | <b>(n=20)</b>     |                |
| Male gender             | 8 (40%)              | 11 (55%)         | 12 (60%)          | 0.42           |
| Age                     | 49.6±4.7             | 48.6±2.9         | 51.1±5.5          | 0.224          |
| Hypertension            | 5 (25%)              | 8 (40%)          | 8 (40%)           | 0.517          |
| Smoker                  | 2 (10%)              | 4 (20%)          | 5 (25%)           | 0.459          |
| BMI(kg/m <sup>2</sup> ) | 23.6±2.1             | 24.4±3.3         | 23.7±2.0          | 0.827          |
| TC(mmol/L)              | 3.6±0.8              | 3.6±0.9          | 4.2±0.9           | 0.083          |
| TG(mmol/L)              | 1.5±0.4              | 1.7±0.3          | 1.7±0.7           | 0.485          |
| HDL(mmol/L)             | 1.3±0.5              | 1.2±0.3          | 1.1±0.3           | 0.636          |
| LDL(mmol/L)             | 2.5±0.6              | 2.6±0.5          | 2.8±0.6           | 0.099          |
| ALT(U/L)                | 24.8±6.6             | 26.9±4.9         | 27.7±7.6          | 0.347          |
| AST(U/L)                | 24.9±5.6             | 24.7±6.2         | 23.2±4.5          | 0.556          |
| Scr(μmol/L)             | 59.2±6.5             | 59.9±4.5         | 61.2±4.9          | 0.517          |
| FT4I(pmol/L)            | 14.2±1.6             | 14.3±2.9         | 13.9±1.9          | 0.764          |
| HbA1c(%)                | 5.0±0.2              | 5.2±0.3          | 7.5±0.7           | <0.001         |
| GLU(mmol/L)             | 5.0±0.4              | 5.4±0.4          | 7.9±0.6           | <0.001         |
| OGTT 2h(mmol/L)         | 6.8±0.5              | 6.9±0.6          | 12.9±1.0          | <0.001         |

**Supplementary Table 3. The clinical and demographic characteristics of the third cohort.**

|                         | <b>Control group</b> | <b>CAD group</b> | <b>T2DM group</b> | <b>p value</b> |
|-------------------------|----------------------|------------------|-------------------|----------------|
|                         | <b>(n=60)</b>        | <b>(n=81)</b>    | <b>(n=64)</b>     |                |
| Male gender             | 29 (48.3%)           | 45(55.6%)        | 35(54.7%)         | 0.627          |
| Age                     | 49.0±5.5             | 50.8±6.0         | 50.6±5.7          | 0.138          |
| Hypertension            | 21(35.0%)            | 38(46.9%)        | 31(48.4%)         | 0.251          |
| Smoker                  | 12(20.0%)            | 21(25.9%)        | 18(28.1%)         | 0.556          |
| BMI(kg/m <sup>2</sup> ) | 24.5±3.8             | 24.6±3.0         | 23.9±3.8          | 0.404          |
| TC(mmol/L)              | 3.6±0.7              | 4.3±1.0          | 4.3±0.5           | <0.001         |
| TG(mmol/L)              | 1.4±0.4              | 1.5±0.3          | 1.5±0.4           | 0.297          |
| HDL(mmol/L)             | 1.0±0.2              | 1.0±0.1          | 1.0±0.2           | 0.415          |
| LDL(mmol/L)             | 2.5±0.8              | 2.7±0.5          | 2.5±0.4           | 0.199          |
| ALT(U/L)                | 25.5±8.4             | 25.8±4.0         | 26.3±5.9          | 0.651          |
| AST(U/L)                | 23.2±5.6             | 24.7±3.6         | 24.5±4.6          | 0.178          |
| Scr(μmol/L)             | 58.0±8.1             | 58.4±7.7         | 59.6±6.0          | 0.442          |
| FT4I(pmol/L)            | 14.4±1.6             | 15.6±2.3         | 14.9±2.2          | 0.006          |
| HbA1c(%)                | 5.0±0.4              | 5.3±0.4          | 7.5±0.6           | <0.001         |
| GLU(mmol/L)             | 4.8±0.5              | 5.2±0.4          | 8.2±1.0           | <0.001         |
| OGTT 2h(mmol/L)         | 6.6±0.4              | 6.5±0.7          | 14.4±1.8          | <0.001         |

BMI: body mass index; TC: total cholesterol; TG: triglyceride; HDL: high density lipoprotein;

LDL: low density lipoprotein; ALT: alanine transaminase; AST: aspartate transaminase; Scr:

serum creatinine, FT4I: free thyroxine index; GLU: glucose; OGTT: oral glucose tolerance test.

**Supplementary Table 4. Nucleotide sequences of primers used for Q-RCR.**

|                     | <b>Forward</b>            | <b>Reverse</b>           | <b>Product length</b> |
|---------------------|---------------------------|--------------------------|-----------------------|
| hsa_circ_0009036    | GCTGCTCTACTCATCGACTGG     | TGCTTGCTCATTACTTCGCCT    | 86                    |
| hsa_circ_0054129    | CTGATCTTGAGGAAAACCAGAATGC | CCCTGTAGAGGTGGAACAGGT    | 134                   |
| hsa-circRNA11806-28 | TCTGTCAGATGTCAGAGGAGGA    | GTGCACCAAGATTTCTGTTCG    | 105                   |
| hsa-circRNA6510-1   | ACATCAGGAGTGGTTCTCTGTGA   | TGTAGTCCTGAGTTAGCAAGGAGA | 104                   |
| hsa-circRNA11783-2  | GGCTTCTGGGACGTCTAAACA     | TGCAGCTGTAAAGCACTCTTTC   | 129                   |
| $\beta$ -actin      | GGGACCTGACTGACTACCTC      | TCATACTCCTGCTTGCTGAT     | 541                   |

|                         | CAD            |             | T2DM           |             | CAD combined with T2DM |             |
|-------------------------|----------------|-------------|----------------|-------------|------------------------|-------------|
|                         | <i>P</i> value | Fold change | <i>P</i> value | Fold change | <i>P</i> value         | Fold change |
| <b>Upregulated</b>      |                |             |                |             |                        |             |
| hsa_circ_0128506        | <0.001         | 3.8         | 0.006          | 2.0         | <0.001                 | 2.3         |
| <b>hsa_circ_0054129</b> | 0.002          | 2.4         | 0.001          | 2.2         | 0.001                  | 2.5         |
| hsa_circ_0077770        | 0.006          | 2.4         | 0.003          | 2.3         | 0.013                  | 2.0         |
| hsa_circ_0124636        | 0.003          | 3.6         | 0.002          | 2.8         | 0.022                  | 2.5         |
| hsa_circ_0054633        | 0.024          | 2.4         | 0.005          | 2.9         | 0.024                  | 2.4         |
| hsa_circ_0106442        | 0.041          | 2.3         | 0.032          | 2.0         | 0.024                  | 2.0         |
| hsa_circ_0111612        | 0.015          | 3.0         | 0.047          | 2.3         | 0.044                  | 2.2         |
| hsa_circ_0105688        | 0.025          | 2.3         | 0.022          | 2.5         | 0.041                  | 2.3         |
| hsa_circ_0139110        | 0.028          | 2.1         | 0.009          | 2.6         | 0.038                  | 2.2         |
| hsa_circ_0092576        | 0.049          | 2.5         | 0.048          | 2.0         | 0.038                  | 2.4         |
| hsa_circ_0133936        | 0.007          | 2.5         | 0.016          | 2.4         | 0.004                  | 2.4         |
| hsa_circ_0062596        | 0.001          | 3.8         | 0.018          | 2.5         | 0.018                  | 3.1         |
| hsa-circRNA13247-1      | 0.045          | 2.4         | 0.028          | 2.6         | 0.049                  | 2.3         |
| <b>Downregulated</b>    |                |             |                |             |                        |             |
| hsa_circ_0099580        | <0.001         | 3.8         | <0.001         | 3.0         | 0.011                  | 2.4         |
| hsa_circ_0134682        | 0.002          | 2.6         | 0.017          | 2.0         | 0.013                  | 2.1         |
| hsa_circ_0089925        | 0.002          | 2.6         | 0.005          | 2.3         | 0.022                  | 2.2         |
| hsa_circ_0056990        | 0.002          | 3.3         | 0.014          | 2.3         | 0.031                  | 2.2         |
| hsa_circ_0126894        | <0.001         | 3.0         | 0.003          | 2.2         | 0.019                  | 2.0         |

---

|                            |        |     |        |     |        |     |
|----------------------------|--------|-----|--------|-----|--------|-----|
| hsa_circ_0040028           | 0.004  | 2.3 | 0.001  | 2.5 | 0.014  | 2.3 |
| hsa_circ_0069228           | <0.001 | 3.6 | <0.001 | 2.4 | 0.043  | 2.1 |
| hsa_circ_0117499           | <0.001 | 2.7 | 0.001  | 2.1 | 0.001  | 2.4 |
| <b>hsa_circ_0009036</b>    | <0.001 | 2.8 | <0.001 | 2.2 | <0.001 | 2.3 |
| hsa_circ_0105010           | <0.001 | 3.1 | <0.001 | 2.5 | 0.034  | 2.1 |
| hsa_circ_0129104           | 0.006  | 3.3 | 0.022  | 2.6 | 0.015  | 2.7 |
| hsa_circ_0136904           | <0.001 | 3.3 | <0.001 | 2.4 | 0.003  | 2.2 |
| <b>hsa-circRNA6510-1</b>   | <0.001 | 3.2 | <0.001 | 2.4 | 0.002  | 2.3 |
| hsa_circ_0126693           | 0.002  | 2.8 | 0.004  | 2.2 | 0.019  | 2.2 |
| hsa-circRNA14588-10        | <0.001 | 3.0 | 0.001  | 2.2 | 0.010  | 2.1 |
| hsa_circ_0025977           | <0.001 | 2.7 | 0.001  | 2.2 | 0.004  | 2.0 |
| hsa_circ_0093710           | <0.001 | 2.9 | 0.005  | 2.4 | 0.016  | 2.0 |
| hsa_circ_0106175           | 0.001  | 2.6 | 0.004  | 2.0 | 0.018  | 2.0 |
| hsa_circ_0099711           | <0.001 | 4.1 | <0.001 | 3.1 | 0.029  | 2.2 |
| <b>hsa-circRNA11806-28</b> | <0.001 | 3.1 | <0.001 | 2.7 | 0.001  | 2.1 |
| hsa_circ_0030732           | <0.001 | 3.3 | <0.001 | 2.6 | 0.003  | 2.1 |
| hsa-circRNA4388-10         | <0.001 | 3.0 | 0.003  | 2.3 | 0.013  | 2.1 |
| hsa_circ_0087212           | <0.001 | 2.8 | 0.001  | 2.3 | 0.004  | 2.1 |
| hsa_circ_0140081           | <0.001 | 3.3 | <0.001 | 2.5 | 0.027  | 2.0 |
| hsa_circ_0071250           | <0.001 | 3.7 | 0.002  | 3.1 | 0.023  | 2.3 |
| hsa_circ_0038424           | 0.004  | 2.1 | 0.002  | 2.1 | 0.002  | 2.5 |
| <b>hsa-circRNA11783-2</b>  | <0.001 | 2.9 | <0.001 | 2.4 | 0.002  | 2.6 |

---

**Supplementary Table 8. Differentially expressed circRNAs between control group and the three experimental groups.**

The **highlighted circRNAs are shown in bold text.**
