# Supplementary material for: Hsa-circRNA11783-2 in peripheral blood is correlated with coronary artery disease and type 2 diabetes mellitus
Source: PubMed Central journal article supplement — Diab Vasc Dis Res. 2017 Aug 4;14(6):510–5. doi: 10.1177/1479164117722714 (PMC5652644; doi:10.1177/1479164117722714), 2017-08-04
Supplement: Suppl_table_5-6.pdf [file Suppl_table_5-6.pdf]

Supplementary Table 5. Differentially expressed circRNAs between the control group and the C

| circRNA                | <i>P</i> value | Fold change | pressi | circRNA                | <i>P</i> value |
|------------------------|----------------|-------------|--------|------------------------|----------------|
| hsa_circ_0138686_CBC1  | 0.037516       | 2.457221638 | up     | hsa_circ_0098435_CBC1  | 0.006391       |
| hsa_circ_0080942_CBC1  | 0.025001       | 2.131614051 | up     | hsa-circRNA11117-80_CB | 0.000136       |
| hsa_circ_0078270_CBC1  | 0.030017       | 2.042501174 | up     | hsa-circRNA5535-24_CBC | 0.003857       |
| hsa_circ_0054661_CBC1  | 0.038945       | 2.004446133 | up     | hsa_circ_0088069_CBC1  | 6.55E-05       |
| hsa_circ_0135536_CBC1  | 0.023562       | 2.27326352  | up     | hsa_circ_0000356_CBC1  | 0.002924       |
| hsa_circ_0114632_CBC1  | 0.032858       | 2.085818711 | up     | hsa_circ_0024204_CBC1  | 0.000199       |
| hsa_circ_0056900_CBC1  | 0.008157       | 2.160354022 | up     | hsa_circ_0087384_CBC1  | 0.000123       |
| hsa_circ_0131949_CBC1  | 0.006437       | 2.246752874 | up     | hsa-circRNA8998-9_CBC1 | 0.000386       |
| hsa_circ_0111940_CBC1  | 0.006948       | 2.06041675  | up     | hsa_circ_0122273_CBC1  | 0.000183       |
| hsa_circ_0118547_CBC1  | 0.042784       | 2.158520311 | up     | hsa_circ_0060745_CBC1  | 6.14E-06       |
| hsa-circRNA15743-4_CB  | 0.010097       | 2.194917963 | up     | hsa_circ_0103973_CBC1  | 0.000121       |
| hsa_circ_0125625_CBC1  | 0.010595       | 2.10771296  | up     | hsa_circ_0038475_CBC1  | 0.001658       |
| hsa_circ_0097141_CBC1  | 0.011485       | 2.207058111 | up     | hsa_circ_0115355_CBC1  | 6.33E-06       |
| hsa_circ_0081170_CBC1  | 0.030353       | 2.229694743 | up     | hsa_circ_0123377_CBC1  | 0.000193       |
| hsa_circ_0090968_CBC1  | 0.025519       | 2.070129821 | up     | hsa_circ_0103836_CBC1  | 0.000469       |
| hsa_circ_0030004_CBC1  | 0.010153       | 2.825017898 | up     | hsa_circ_0057526_CBC1  | 0.000141       |
| hsa-circRNA10743-8_CB  | 0.010857       | 2.229014567 | up     | hsa_circ_0073207_CBC1  | 4.97E-05       |
| hsa-circRNA3631-18_CB  | 0.001789       | 2.257357411 | up     | hsa-circRNA14362-13_CB | 0.002156       |
| hsa_circ_0101229_CBC1  | 0.037977       | 2.049176152 | up     | hsa_circ_0070427_CBC1  | 0.00014        |
| hsa_circ_0117746_CBC1  | 0.022225       | 2.510302845 | up     | hsa_circ_0121352_CBC1  | 0.004453       |
| hsa-circRNA13965-18_CI | 0.034778       | 2.008873893 | up     | hsa_circ_0114147_CBC1  | 0.000348       |
| hsa_circ_0020763_CBC1  | 0.040313       | 2.020239848 | up     | hsa-circRNA12505-40_CB | 0.00231        |
| hsa_circ_0130545_CBC1  | 0.00742        | 2.019785952 | up     | hsa-circRNA14855-6_CBC | 0.002757       |
| hsa_circ_0069996_CBC1  | 0.012965       | 2.089976511 | up     | hsa_circ_0099580_CBC1  | 3.1E-05        |
| hsa_circ_0065892_CBC1  | 0.025661       | 2.272117027 | up     | hsa_circ_0035988_CBC1  | 8.72E-06       |
| hsa_circ_0086409_CBC1  | 0.003263       | 2.15368752  | up     | hsa-circRNA1531-98_CBC | 0.000401       |
| hsa_circ_0010992_CBC1  | 0.030201       | 2.277764171 | up     | hsa_circ_0002484_CBC1  | 0.013973       |
| hsa-circRNA5810-8_CBC  | 0.004125       | 2.016560074 | up     | hsa_circ_0135076_CBC1  | 0.000582       |
| hsa_circ_0130453_CBC1  | 0.021366       | 2.191315757 | up     | hsa-circRNA4388-17_CBC | 2.58E-05       |
| hsa_circ_0003358_CBC1  | 0.00946        | 2.308178114 | up     | hsa-circRNA13773-24_CB | 6.38E-05       |
| hsa_circ_0047838_CBC1  | 0.013748       | 2.174507153 | up     | hsa_circ_0024656_CBC1  | 0.029709       |
| hsa_circ_0136710_CBC1  | 0.016876       | 2.044303984 | up     | hsa_circ_0132149_CBC1  | 7.17E-06       |
| hsa_circ_0128506_CBC1  | 6.56E-05       | 3.84520301  | up     | hsa_circ_0057129_CBC1  | 0.002241       |
| hsa_circ_0108825_CBC1  | 0.0141         | 2.258731381 | up     | hsa-circRNA6210-8_CBC1 | 0.000351       |
| hsa_circ_0062841_CBC1  | 0.012373       | 2.001355601 | up     | hsa_circ_0099712_CBC1  | 8.81E-06       |
| hsa_circ_0058592_CBC1  | 0.003836       | 2.268375774 | up     | hsa-circRNA1531-13_CBC | 0.000154       |
| hsa_circ_0112658_CBC1  | 0.013276       | 2.22512689  | up     | hsa_circ_0054814_CBC1  | 0.000559       |
| hsa_circ_0084597_CBC1  | 0.011265       | 2.07143251  | up     | hsa_circ_0110363_CBC1  | 3.92E-05       |
| hsa_circ_0112132_CBC1  | 0.005315       | 2.532350106 | up     | hsa_circ_0002949_CBC1  | 0.002955       |
| hsa_circ_0098274_CBC1  | 0.035263       | 2.066235172 | up     | hsa_circ_0102132_CBC1  | 0.001446       |
| hsa_circ_0121264_CBC1  | 0.038796       | 2.012936728 | up     | hsa-circRNA674-1_CBC1  | 0.004227       |
| hsa_circ_0100801_CBC1  | 0.008996       | 2.217658449 | up     | hsa-circRNA14403-46_CB | 5.78E-05       |
| hsa_circ_0135779_CBC1  | 0.021204       | 2.102934774 | up     | hsa_circ_0123014_CBC1  | 0.000131       |
| hsa_circ_0080944_CBC1  | 0.005813       | 2.00752245  | up     | hsa_circ_0103837_CBC1  | 0.004344       |
| hsa_circ_0121598_CBC1  | 0.013438       | 2.200011755 | up     | hsa_circ_0106578_CBC1  | 0.000152       |
| hsa_circ_0103926_CBC1  | 0.000356       | 2.302039138 | up     | hsa_circ_0067583_CBC1  | 2.72E-05       |
| hsa-circRNA1774-11_CB  | 0.009688       | 2.0819176   | up     | hsa_circ_0139212_CBC1  | 0.00035        |
| hsa_circ_0120277_CBC1  | 0.013694       | 2.335242357 | up     | hsa_circ_0044878_CBC1  | 0.000354       |

|                        |          |             |    |                        |          |
|------------------------|----------|-------------|----|------------------------|----------|
| hsa_circ_0136176_CBC1  | 0.03199  | 2.333391091 | up | hsa_circ_0070788_CBC1  | 0.007674 |
| hsa-circRNA15687-10_C1 | 0.007413 | 2.310675418 | up | hsa_circ_0003080_CBC1  | 0.001671 |
| hsa-circRNA810-4_CBC1  | 0.027021 | 2.284298616 | up | hsa_circ_0097983_CBC1  | 2.68E-06 |
| hsa_circ_0132345_CBC1  | 0.009639 | 2.82734307  | up | hsa_circ_0124963_CBC1  | 0.000484 |
| hsa_circ_0139087_CBC1  | 0.048361 | 2.069242228 | up | hsa_circ_0027949_CBC1  | 0.002241 |
| hsa-circRNA5666-2_CBC  | 0.038909 | 2.038713328 | up | hsa-circRNA4390-495_CB | 0.000245 |
| hsa_circ_0118755_CBC1  | 0.003173 | 2.347769138 | up | hsa-circRNA10051-8_CBC | 0.003895 |
| hsa_circ_0126920_CBC1  | 0.024063 | 2.166057445 | up | hsa_circ_0083544_CBC1  | 0.001637 |
| hsa_circ_0080943_CBC1  | 0.032578 | 2.141446413 | up | hsa_circ_0004280_CBC1  | 5.83E-05 |
| hsa_circ_0127202_CBC1  | 0.013898 | 2.161906468 | up | hsa_circ_0076403_CBC1  | 0.000248 |
| hsa_circ_0092546_CBC1  | 0.007745 | 2.180292662 | up | hsa_circ_0083708_CBC1  | 0.000503 |
| hsa_circ_0050079_CBC1  | 0.045418 | 2.187972645 | up | hsa_circ_0020041_CBC1  | 0.000116 |
| hsa_circ_0070556_CBC1  | 0.006204 | 2.024817364 | up | hsa_circ_0070593_CBC1  | 0.00126  |
| hsa_circ_0051649_CBC1  | 0.006422 | 2.166692294 | up | hsa_circ_0120834_CBC1  | 0.012721 |
| hsa-circRNA7472-13_CB  | 0.024194 | 2.216005922 | up | hsa_circ_0120951_CBC1  | 1.87E-05 |
| hsa_circ_0124695_CBC1  | 0.007272 | 2.348275161 | up | hsa-circRNA7984-27_CBC | 8.36E-05 |
| hsa_circ_0036671_CBC1  | 0.02749  | 2.020253826 | up | hsa_circ_0107937_CBC1  | 0.003114 |
| hsa_circ_0108742_CBC1  | 0.00191  | 2.158743823 | up | hsa_circ_0036829_CBC1  | 0.000239 |
| hsa_circ_0054129_CBC1  | 0.002008 | 2.391255853 | up | hsa_circ_0056401_CBC1  | 0.000243 |
| hsa_circ_0134275_CBC1  | 0.001597 | 2.016751153 | up | hsa_circ_0127352_CBC1  | 7.42E-05 |
| hsa-circRNA5388-5_CBC  | 0.011391 | 2.374994218 | up | hsa_circ_0085163_CBC1  | 1.43E-05 |
| hsa_circ_0051301_CBC1  | 0.005651 | 2.036921812 | up | hsa_circ_0063769_CBC1  | 1.09E-05 |
| hsa_circ_0121032_CBC1  | 0.004016 | 2.004347358 | up | hsa-circRNA2727-77_CBC | 0.000125 |
| hsa-circRNA738-24_CBC  | 0.009609 | 2.144701264 | up | hsa-circRNA7522-40_CBC | 0.002448 |
| hsa-circRNA11762-3_CB  | 0.003827 | 2.153521232 | up | hsa_circ_0027852_CBC1  | 0.000313 |
| hsa_circ_0112450_CBC1  | 0.002244 | 2.056359475 | up | hsa_circ_0081885_CBC1  | 0.000198 |
| hsa_circ_0100529_CBC1  | 0.012466 | 2.260037374 | up | hsa-circRNA7047-8_CBC1 | 0.000216 |
| hsa_circ_0119053_CBC1  | 0.013086 | 2.201852894 | up | hsa_circ_0139952_CBC1  | 0.003061 |
| hsa-circRNA8675-6_CBC  | 0.015115 | 2.3487289   | up | hsa_circ_0060234_CBC1  | 0.005927 |
| hsa_circ_0067167_CBC1  | 0.030241 | 2.212127516 | up | hsa_circ_0036835_CBC1  | 6.89E-05 |
| hsa_circ_0113687_CBC1  | 0.014041 | 2.0038469   | up | hsa-circRNA2177-25_CBC | 4.94E-06 |
| hsa_circ_0115681_CBC1  | 0.01503  | 2.369398822 | up | hsa_circ_0099523_CBC1  | 8.61E-05 |
| hsa_circ_0007124_CBC1  | 0.014302 | 2.03711846  | up | hsa_circ_0100155_CBC1  | 0.002804 |
| hsa_circ_0052031_CBC1  | 0.022664 | 2.440678032 | up | hsa_circ_0054355_CBC1  | 0.000169 |
| hsa_circ_0045664_CBC1  | 0.032448 | 2.020940754 | up | hsa_circ_0094980_CBC1  | 2.29E-05 |
| hsa_circ_0015868_CBC1  | 0.001527 | 3.035904315 | up | hsa_circ_0053617_CBC1  | 0.009165 |
| hsa_circ_0113733_CBC1  | 0.025967 | 2.272473408 | up | hsa_circ_0047015_CBC1  | 0.00036  |
| hsa_circ_0048859_CBC1  | 0.034043 | 2.301373718 | up | hsa_circ_0114050_CBC1  | 0.000532 |
| hsa_circ_0135503_CBC1  | 0.006219 | 2.740588928 | up | hsa-circRNA14362-12_CB | 0.00224  |
| hsa_circ_0016127_CBC1  | 0.005384 | 2.061129362 | up | hsa_circ_0073202_CBC1  | 3.68E-06 |
| hsa_circ_0088218_CBC1  | 3.35E-05 | 2.549821756 | up | hsa-circRNA6055-11_CBC | 6.29E-05 |
| hsa_circ_0033063_CBC1  | 0.041923 | 2.13947821  | up | hsa_circ_0023761_CBC1  | 5.58E-06 |
| hsa_circ_0022117_CBC1  | 0.039917 | 2.022490997 | up | hsa_circ_0071857_CBC1  | 1.56E-05 |
| hsa_circ_0109064_CBC1  | 0.028694 | 2.110566427 | up | hsa_circ_0047016_CBC1  | 5.55E-05 |
| hsa_circ_0122315_CBC1  | 0.012306 | 2.359217798 | up | hsa_circ_0127004_CBC1  | 4.61E-05 |
| hsa_circ_0052919_CBC1  | 0.040994 | 2.023593792 | up | hsa_circ_0074832_CBC1  | 6.14E-06 |
| hsa_circ_0127835_CBC1  | 0.004418 | 2.393441977 | up | hsa_circ_0037890_CBC1  | 2.45E-05 |
| hsa-circRNA13490-1_CB  | 0.005054 | 2.264699139 | up | hsa_circ_0034349_CBC1  | 2.98E-05 |
| hsa_circ_0134595_CBC1  | 0.012974 | 2.135220992 | up | hsa-circRNA4625-11_CBC | 0.000708 |
| hsa_circ_0030875_CBC1  | 0.017071 | 2.183133815 | up | hsa_circ_0116057_CBC1  | 0.000216 |

|                       |          |             |    |                        |          |
|-----------------------|----------|-------------|----|------------------------|----------|
| hsa-circRNA937-5_CBC1 | 0.026366 | 2.129753638 | up | hsa-circRNA1958-2_CBC1 | 0.000346 |
| hsa_circ_0085171_CBC1 | 0.011725 | 2.517221011 | up | hsa_circ_0096148_CBC1  | 0.000919 |
| hsa_circ_0094789_CBC1 | 0.045336 | 2.034995124 | up | hsa-circRNA7370-10_CBC | 0.00126  |
| hsa_circ_0126469_CBC1 | 0.025543 | 2.505035461 | up | hsa_circ_0023785_CBC1  | 1.5E-05  |
| hsa_circ_0043081_CBC1 | 0.000188 | 2.174987993 | up | hsa_circ_0085080_CBC1  | 0.000474 |
| hsa-circRNA1257-26_CB | 0.011864 | 2.266796227 | up | hsa_circ_0094291_CBC1  | 0.001149 |
| hsa_circ_0036261_CBC1 | 0.007213 | 2.173369882 | up | hsa-circRNA2283-24_CBC | 0.001074 |
| hsa_circ_0124389_CBC1 | 0.002373 | 2.391965361 | up | hsa_circ_0126845_CBC1  | 2.39E-05 |
| hsa_circ_0052283_CBC1 | 0.025509 | 2.234781166 | up | hsa_circ_0084571_CBC1  | 0.000663 |
| hsa_circ_0077059_CBC1 | 0.031557 | 2.104684852 | up | hsa_circ_0066092_CBC1  | 0.000102 |
| hsa_circ_0068087_CBC1 | 0.019508 | 2.602253018 | up | hsa_circ_0129399_CBC1  | 0.000701 |
| hsa_circ_0104691_CBC1 | 0.036554 | 2.102709224 | up | hsa_circ_0037901_CBC1  | 0.006584 |
| hsa-circRNA419_CBC1   | 0.042356 | 2.376480781 | up | hsa_circ_0031567_CBC1  | 0.000661 |
| hsa_circ_0018423_CBC1 | 0.003725 | 2.271077659 | up | hsa_circ_0118038_CBC1  | 3.31E-05 |
| hsa_circ_0101693_CBC1 | 0.006342 | 2.038963206 | up | hsa_circ_0091373_CBC1  | 9.42E-05 |
| hsa_circ_0139740_CBC1 | 0.006652 | 2.544312672 | up | hsa_circ_0000992_CBC1  | 0.000779 |
| hsa_circ_0094984_CBC1 | 0.028432 | 2.389653021 | up | hsa_circ_0025949_CBC1  | 2.73E-06 |
| hsa_circ_0103602_CBC1 | 0.004406 | 2.590943994 | up | hsa_circ_0039380_CBC1  | 9.24E-05 |
| hsa_circ_0130146_CBC1 | 0.013973 | 2.48939367  | up | hsa_circ_0085445_CBC1  | 0.012578 |
| hsa-circRNA9831-2_CBC | 0.049417 | 2.548297001 | up | hsa-circRNA14512-7_CBC | 0.000118 |
| hsa_circ_0077043_CBC1 | 0.013607 | 2.273921628 | up | hsa_circ_0084851_CBC1  | 1.15E-05 |
| hsa_circ_0136462_CBC1 | 0.020745 | 2.620739762 | up | hsa_circ_0016649_CBC1  | 0.000476 |
| hsa_circ_0125692_CBC1 | 0.03336  | 2.170555614 | up | hsa_circ_0054815_CBC1  | 0.000239 |
| hsa_circ_0121546_CBC1 | 0.027153 | 2.017377681 | up | hsa_circ_0139185_CBC1  | 0.000146 |
| hsa_circ_0082025_CBC1 | 0.011077 | 2.036566661 | up | hsa_circ_0018461_CBC1  | 0.001894 |
| hsa_circ_0041829_CBC1 | 0.006884 | 2.138283818 | up | hsa_circ_0118407_CBC1  | 0.001309 |
| hsa_circ_0077770_CBC1 | 0.006246 | 2.353888721 | up | hsa_circ_0119317_CBC1  | 0.000825 |
| hsa-circRNA9191-11_CB | 0.021367 | 2.017414391 | up | hsa_circ_0005684_CBC1  | 0.000225 |
| hsa_circ_0094525_CBC1 | 0.035425 | 2.029849347 | up | hsa_circ_0123493_CBC1  | 0.000194 |
| hsa_circ_0093776_CBC1 | 0.001059 | 2.045147257 | up | hsa_circ_0078175_CBC1  | 6.38E-05 |
| hsa_circ_0049995_CBC1 | 0.042518 | 3.271669888 | up | hsa_circ_0093859_CBC1  | 4.44E-05 |
| hsa_circ_0065551_CBC1 | 0.025555 | 2.045817873 | up | hsa_circ_0029810_CBC1  | 0.00332  |
| hsa_circ_0128772_CBC1 | 0.002553 | 2.415633647 | up | hsa-circRNA3001-24_CBC | 0.000559 |
| hsa_circ_0105923_CBC1 | 0.017359 | 2.726549626 | up | hsa-circRNA10041-5_CBC | 0.001624 |
| hsa_circ_0013052_CBC1 | 0.014984 | 2.708728052 | up | hsa_circ_0120324_CBC1  | 0.000202 |
| hsa_circ_0094788_CBC1 | 0.007114 | 2.365649731 | up | hsa_circ_0125419_CBC1  | 0.000962 |
| hsa_circ_0020106_CBC1 | 0.022045 | 2.487522907 | up | hsa_circ_0061746_CBC1  | 0.000193 |
| hsa-circRNA7758-8_CBC | 0.003811 | 2.12152314  | up | hsa_circ_0120865_CBC1  | 0.000278 |
| hsa_circ_0128511_CBC1 | 0.021394 | 2.292293255 | up | hsa_circ_0000673_CBC1  | 6.92E-06 |
| hsa_circ_0130879_CBC1 | 0.01916  | 2.108026117 | up | hsa_circ_0094904_CBC1  | 0.000353 |
| hsa_circ_0124636_CBC1 | 0.002652 | 3.624474256 | up | hsa_circ_0004504_CBC1  | 5.2E-06  |
| hsa_circ_0043352_CBC1 | 0.022079 | 2.033570731 | up | hsa_circ_0038535_CBC1  | 0.000755 |
| hsa_circ_0017817_CBC1 | 0.036583 | 2.416567981 | up | hsa_circ_0027350_CBC1  | 0.0024   |
| hsa-circRNA15056-1_CB | 0.005927 | 2.340763014 | up | hsa-circRNA12419-20_CB | 0.000576 |
| hsa_circ_0099638_CBC1 | 0.045337 | 2.16158746  | up | hsa-circRNA14096-17_CB | 6.66E-05 |
| hsa_circ_0081166_CBC1 | 0.011066 | 2.25765728  | up | hsa_circ_0073036_CBC1  | 5.35E-06 |
| hsa-circRNA3444-3_CBC | 0.046581 | 4.858916733 | up | hsa-circRNA11549_CBC1  | 1.46E-05 |
| hsa_circ_0133392_CBC1 | 0.026069 | 2.313460441 | up | hsa_circ_0033118_CBC1  | 5.54E-06 |
| hsa-circRNA1257-28_CB | 0.001075 | 2.059909327 | up | hsa_circ_0134682_CBC1  | 0.002026 |
| hsa_circ_0096927_CBC1 | 0.003794 | 2.203603976 | up | hsa-circRNA10231-5_CBC | 0.003795 |

|                       |          |             |    |                        |          |
|-----------------------|----------|-------------|----|------------------------|----------|
| hsa_circ_0130317_CBC1 | 0.036434 | 2.041303416 | up | hsa_circ_0006347_CBC1  | 0.000747 |
| hsa_circ_0133199_CBC1 | 0.01082  | 2.076578538 | up | hsa_circ_0021570_CBC1  | 0.001361 |
| hsa_circ_0108320_CBC1 | 0.016621 | 2.321140296 | up | hsa_circ_0074770_CBC1  | 9.39E-05 |
| hsa_circ_0003823_CBC1 | 0.005709 | 2.23196221  | up | hsa_circ_0068362_CBC1  | 0.002259 |
| hsa_circ_0054633_CBC1 | 0.02421  | 2.39232328  | up | hsa-circRNA5607-16_CBC | 0.000176 |
| hsa_circ_0114299_CBC1 | 0.007527 | 2.935267274 | up | hsa-circRNA12483-38_CB | 0.002083 |
| hsa_circ_0106442_CBC1 | 0.040819 | 2.25845556  | up | hsa_circ_0058526_CBC1  | 3.45E-05 |
| hsa_circ_0104096_CBC1 | 0.00824  | 2.34807209  | up | hsa_circ_0068647_CBC1  | 5.19E-05 |
| hsa_circ_0116657_CBC1 | 0.010361 | 3.360935759 | up | hsa-circRNA9065-6_CBC1 | 0.002454 |
| hsa_circ_0082198_CBC1 | 0.004657 | 2.033175171 | up | hsa_circ_0030737_CBC1  | 1.34E-05 |
| hsa-circRNA3646-4_CBC | 0.003207 | 2.609937356 | up | hsa_circ_0028009_CBC1  | 0.000106 |
| hsa_circ_0125318_CBC1 | 0.034749 | 2.156058546 | up | hsa_circ_0103024_CBC1  | 8.89E-06 |
| hsa_circ_0115680_CBC1 | 0.002585 | 2.171729498 | up | hsa-circRNA12910-7_CBC | 0.000374 |
| hsa_circ_0050169_CBC1 | 0.022705 | 2.762034523 | up | hsa-circRNA1607_CBC1   | 0.01554  |
| hsa_circ_0012576_CBC1 | 0.011385 | 2.006924017 | up | hsa_circ_0071841_CBC1  | 0.000122 |
| hsa_circ_0093170_CBC1 | 0.003905 | 2.274383147 | up | hsa-circRNA15046-31_CB | 0.000159 |
| hsa_circ_0121047_CBC1 | 0.025776 | 2.084287453 | up | hsa_circ_0044890_CBC1  | 0.001503 |
| hsa_circ_0128590_CBC1 | 0.004537 | 2.266476118 | up | hsa_circ_0090333_CBC1  | 0.000246 |
| hsa_circ_0097238_CBC1 | 0.045967 | 2.023493012 | up | hsa_circ_0006642_CBC1  | 0.000567 |
| hsa_circ_0103367_CBC1 | 0.013704 | 2.394495793 | up | hsa-circRNA10199-1_CBC | 0.000105 |
| hsa_circ_0039350_CBC1 | 0.023867 | 2.147567551 | up | hsa_circ_0018987_CBC1  | 0.000101 |
| hsa_circ_0135532_CBC1 | 0.002603 | 2.127057549 | up | hsa-circRNA15808-3_CBC | 0.000101 |
| hsa_circ_0099825_CBC1 | 0.003284 | 2.148653071 | up | hsa_circ_0032452_CBC1  | 0.000202 |
| hsa_circ_0129945_CBC1 | 0.006027 | 2.369023058 | up | hsa_circ_0094901_CBC1  | 0.000284 |
| hsa_circ_0107866_CBC1 | 0.006161 | 2.084479549 | up | hsa_circ_0123376_CBC1  | 0.000815 |
| hsa_circ_0042350_CBC1 | 0.029123 | 2.054351917 | up | hsa_circ_0102043_CBC1  | 0.004493 |
| hsa_circ_0033047_CBC1 | 0.001261 | 2.039486622 | up | hsa_circ_0111472_CBC1  | 0.011479 |
| hsa_circ_0133461_CBC1 | 0.049307 | 2.022521687 | up | hsa_circ_0025311_CBC1  | 0.003637 |
| hsa_circ_0125611_CBC1 | 0.012846 | 2.66736255  | up | hsa-circRNA15564-13_CB | 1.67E-05 |
| hsa_circ_0100191_CBC1 | 0.021054 | 2.033273689 | up | hsa_circ_0114307_CBC1  | 0.001151 |
| hsa-circRNA738-38_CBC | 0.006619 | 2.124164866 | up | hsa_circ_0083507_CBC1  | 5.25E-05 |
| hsa-circRNA5974-1_CBC | 0.04641  | 2.551339259 | up | hsa_circ_0012364_CBC1  | 0.004922 |
| hsa_circ_0134121_CBC1 | 0.040017 | 2.021100394 | up | hsa_circ_0086460_CBC1  | 0.001399 |
| hsa_circ_0081576_CBC1 | 0.001101 | 2.087026906 | up | hsa_circ_0085395_CBC1  | 0.0002   |
| hsa_circ_0130979_CBC1 | 0.047164 | 2.363003503 | up | hsa_circ_0055814_CBC1  | 0.000576 |
| hsa_circ_0017797_CBC1 | 0.03111  | 2.021467894 | up | hsa_circ_0139170_CBC1  | 0.000916 |
| hsa_circ_0071320_CBC1 | 0.010686 | 2.869320234 | up | hsa_circ_0091156_CBC1  | 5.95E-05 |
| hsa-circRNA7603-4_CBC | 0.04684  | 2.042648646 | up | hsa_circ_0028967_CBC1  | 0.000353 |
| hsa_circ_0108141_CBC1 | 0.024294 | 2.328893243 | up | hsa-circRNA2354-25_CBC | 0.000238 |
| hsa_circ_0061113_CBC1 | 0.046578 | 2.359671788 | up | hsa-circRNA12505-30_CB | 4.45E-05 |
| hsa_circ_0109904_CBC1 | 0.03724  | 2.134668555 | up | hsa_circ_0057130_CBC1  | 0.000199 |
| hsa_circ_0099754_CBC1 | 0.00449  | 2.02688953  | up | hsa_circ_0121278_CBC1  | 0.00112  |
| hsa_circ_0135570_CBC1 | 0.014401 | 2.781049482 | up | hsa-circRNA5792-1_CBC1 | 0.000289 |
| hsa_circ_0093731_CBC1 | 0.037825 | 2.371716997 | up | hsa_circ_0120344_CBC1  | 0.00601  |
| hsa_circ_0124644_CBC1 | 0.002462 | 2.917810023 | up | hsa_circ_0097987_CBC1  | 0.000113 |
| hsa_circ_0066551_CBC1 | 0.011399 | 2.589747616 | up | hsa-circRNA7452-8_CBC1 | 0.000221 |
| hsa_circ_0112670_CBC1 | 0.016017 | 2.560227413 | up | hsa_circ_0067587_CBC1  | 4.93E-05 |
| hsa_circ_0105716_CBC1 | 0.027442 | 2.624608487 | up | hsa_circ_0054762_CBC1  | 6.81E-05 |
| hsa_circ_0102807_CBC1 | 0.048679 | 2.027637529 | up | hsa_circ_0114029_CBC1  | 0.03749  |
| hsa_circ_0101507_CBC1 | 0.011442 | 2.252798417 | up | hsa-circRNA949-20_CBC1 | 9.75E-06 |



|                       |          |             |    |                        |          |
|-----------------------|----------|-------------|----|------------------------|----------|
| hsa_circ_0038621_CBC1 | 0.006688 | 2.15044299  | up | hsa_circ_0135645_CBC1  | 0.004373 |
| hsa_circ_0115532_CBC1 | 0.007061 | 2.470098264 | up | hsa_circ_0017343_CBC1  | 2.03E-05 |
| hsa_circ_0111609_CBC1 | 0.029044 | 2.383621378 | up | hsa_circ_0039935_CBC1  | 0.000218 |
| hsa_circ_0114640_CBC1 | 0.002623 | 2.693389156 | up | hsa_circ_0025963_CBC1  | 0.00014  |
| hsa_circ_0111612_CBC1 | 0.01499  | 3.01322769  | up | hsa_circ_0070596_CBC1  | 0.000856 |
| hsa_circ_0103221_CBC1 | 0.033178 | 2.264954266 | up | hsa-circRNA674-12_CBC1 | 0.000558 |
| hsa_circ_0030880_CBC1 | 0.013681 | 2.120874304 | up | hsa_circ_0139703_CBC1  | 0.000334 |
| hsa_circ_0125757_CBC1 | 0.033033 | 2.864025456 | up | hsa_circ_0054554_CBC1  | 0.009215 |
| hsa_circ_0105688_CBC1 | 0.025068 | 2.274918546 | up | hsa_circ_0123595_CBC1  | 0.000599 |
| hsa_circ_0137191_CBC1 | 0.019894 | 2.734793539 | up | hsa_circ_0118607_CBC1  | 0.000444 |
| hsa_circ_0090453_CBC1 | 0.033321 | 2.27091081  | up | hsa_circ_0125589_CBC1  | 0.000143 |
| hsa_circ_0110718_CBC1 | 0.025547 | 2.147115259 | up | hsa_circ_0115373_CBC1  | 4.33E-05 |
| hsa_circ_0122934_CBC1 | 0.011969 | 2.090828514 | up | hsa_circ_0124356_CBC1  | 0.000629 |
| hsa_circ_0015384_CBC1 | 0.017495 | 2.333211055 | up | hsa_circ_0007762_CBC1  | 0.00013  |
| hsa_circ_0039459_CBC1 | 0.043919 | 2.00664555  | up | hsa_circ_0037041_CBC1  | 0.000215 |
| hsa_circ_0056636_CBC1 | 0.002365 | 2.779909858 | up | hsa_circ_0094860_CBC1  | 0.001202 |
| hsa_circ_0068029_CBC1 | 0.024451 | 2.034408246 | up | hsa_circ_0130957_CBC1  | 2.89E-05 |
| hsa_circ_0106460_CBC1 | 0.004914 | 3.17911347  | up | hsa_circ_0047633_CBC1  | 0.000135 |
| hsa_circ_0124271_CBC1 | 0.002834 | 2.155712384 | up | hsa_circ_0053532_CBC1  | 4.08E-05 |
| hsa_circ_0128184_CBC1 | 0.002291 | 2.063926676 | up | hsa_circ_0072930_CBC1  | 5.44E-05 |
| hsa-circRNA1757-5_CBC | 0.031303 | 2.007727174 | up | hsa-circRNA3310-95_CBC | 0.0003   |
| hsa-circRNA395-11_CBC | 0.034351 | 2.044910787 | up | hsa_circ_0038531_CBC1  | 0.000927 |
| hsa-circRNA14779-7_CB | 0.014093 | 2.080541507 | up | hsa_circ_0003241_CBC1  | 0.000738 |
| hsa_circ_0112622_CBC1 | 0.002983 | 2.10100295  | up | hsa_circ_0030024_CBC1  | 0.000131 |
| hsa_circ_0084709_CBC1 | 0.00095  | 2.00568577  | up | hsa_circ_0015680_CBC1  | 9.99E-05 |
| hsa_circ_0108597_CBC1 | 0.011346 | 2.08066975  | up | hsa_circ_0030735_CBC1  | 0.000543 |
| hsa_circ_0007784_CBC1 | 0.018172 | 2.293810227 | up | hsa_circ_0127772_CBC1  | 0.000727 |
| hsa_circ_0006582_CBC1 | 3.3E-05  | 2.002523415 | up | hsa_circ_0095482_CBC1  | 0.001531 |
| hsa_circ_0118470_CBC1 | 0.019017 | 2.174937748 | up | hsa-circRNA5837-43_CBC | 0.000116 |
| hsa-circRNA9806-2_CBC | 0.007005 | 2.101925664 | up | hsa_circ_0129615_CBC1  | 1.29E-06 |
| hsa_circ_0122630_CBC1 | 0.002939 | 2.033113577 | up | hsa-circRNA12505-5_CBC | 0.001142 |
| hsa-circRNA738-27_CBC | 0.006307 | 2.214941193 | up | hsa-circRNA4388-5_CBC1 | 0.018469 |
| hsa_circ_0071319_CBC1 | 0.015596 | 2.790604315 | up | hsa_circ_0001467_CBC1  | 2.11E-05 |
| hsa_circ_0105702_CBC1 | 0.025728 | 2.116697578 | up | hsa_circ_0024493_CBC1  | 4.68E-05 |
| hsa_circ_0049807_CBC1 | 0.002498 | 2.164590269 | up | hsa_circ_0083037_CBC1  | 0.002895 |
| hsa_circ_0036459_CBC1 | 0.009012 | 2.257265066 | up | hsa_circ_0064736_CBC1  | 0.000632 |
| hsa-circRNA871-8_CBC1 | 0.024144 | 2.22247681  | up | hsa_circ_0106969_CBC1  | 0.003474 |
| hsa-circRNA6358-11_CB | 0.034413 | 2.509798055 | up | hsa_circ_0126535_CBC1  | 0.001496 |
| hsa_circ_0069755_CBC1 | 0.020258 | 2.223174417 | up | hsa_circ_0131682_CBC1  | 0.000126 |
| hsa_circ_0138095_CBC1 | 0.030198 | 2.083855609 | up | hsa-circRNA173-24_CBC1 | 2.93E-05 |
| hsa_circ_0100526_CBC1 | 0.013356 | 2.03603926  | up | hsa_circ_0066868_CBC1  | 0.000105 |
| hsa_circ_0120101_CBC1 | 0.013507 | 2.443683791 | up | hsa_circ_0015806_CBC1  | 0.000334 |
| hsa-circRNA9151-2_CBC | 0.018873 | 2.765672874 | up | hsa_circ_0013616_CBC1  | 0.00012  |
| hsa_circ_0071290_CBC1 | 0.012177 | 2.258705107 | up | hsa_circ_0035946_CBC1  | 0.005349 |
| hsa_circ_0034998_CBC1 | 0.036073 | 2.108469666 | up | hsa_circ_0116048_CBC1  | 0.001541 |
| hsa-circRNA4665-38_CB | 0.007409 | 2.067681371 | up | hsa_circ_0068646_CBC1  | 3.38E-05 |
| hsa_circ_0132238_CBC1 | 0.018574 | 2.089479737 | up | hsa_circ_0023776_CBC1  | 5.41E-06 |
| hsa-circRNA10699-5_CB | 0.030871 | 2.248062488 | up | hsa_circ_0073041_CBC1  | 3.84E-05 |
| hsa_circ_0048532_CBC1 | 0.018863 | 2.124817531 | up | hsa_circ_0028966_CBC1  | 7.84E-05 |
| hsa_circ_0088227_CBC1 | 0.022586 | 2.35593763  | up | hsa_circ_0092511_CBC1  | 0.002951 |

|                       |          |             |    |                        |          |
|-----------------------|----------|-------------|----|------------------------|----------|
| hsa_circ_0133741_CBC1 | 0.04008  | 2.015273005 | up | hsa_circ_0132142_CBC1  | 8.44E-05 |
| hsa_circ_0126850_CBC1 | 0.00038  | 2.231206096 | up | hsa_circ_0053636_CBC1  | 0.005706 |
| hsa_circ_0049485_CBC1 | 0.006444 | 2.370634163 | up | hsa_circ_0122174_CBC1  | 0.000111 |
| hsa_circ_0029121_CBC1 | 0.001571 | 2.862706922 | up | hsa_circ_0002145_CBC1  | 0.001246 |
| hsa_circ_0111608_CBC1 | 0.027769 | 2.166981304 | up | hsa-circRNA11760-7_CBC | 0.000219 |
| hsa_circ_0007849_CBC1 | 0.047095 | 2.031518929 | up | hsa_circ_0039413_CBC1  | 0.00042  |
| hsa_circ_0097795_CBC1 | 0.027729 | 2.142289543 | up | hsa_circ_0054373_CBC1  | 9.94E-05 |
| hsa_circ_0133005_CBC1 | 0.027733 | 2.211858361 | up | hsa_circ_0019293_CBC1  | 0.000194 |
| hsa_circ_0085350_CBC1 | 0.032309 | 2.18104931  | up | hsa_circ_0025979_CBC1  | 0.000441 |
| hsa_circ_0117313_CBC1 | 0.017094 | 2.139726315 | up | hsa_circ_0097977_CBC1  | 7.94E-05 |
| hsa_circ_0080517_CBC1 | 0.006884 | 3.155766036 | up | hsa_circ_0121647_CBC1  | 0.000815 |
| hsa_circ_0133638_CBC1 | 0.016763 | 2.535744073 | up | hsa-circRNA4531-12_CBC | 0.001362 |
| hsa_circ_0008602_CBC1 | 0.016576 | 2.09415181  | up | hsa-circRNA6213-4_CBC1 | 6.5E-05  |
| hsa_circ_0047442_CBC1 | 0.028396 | 2.104809371 | up | hsa_circ_0085446_CBC1  | 0.000361 |
| hsa_circ_0077032_CBC1 | 0.032658 | 2.112910832 | up | hsa-circRNA5821-19_CBC | 3.16E-05 |
| hsa_circ_0082081_CBC1 | 0.027195 | 3.016745748 | up | hsa_circ_0071222_CBC1  | 0.000129 |
| hsa_circ_0023363_CBC1 | 0.042881 | 2.061538989 | up | hsa_circ_0119159_CBC1  | 0.00076  |
| hsa_circ_0011285_CBC1 | 0.005211 | 2.234703044 | up | hsa_circ_0067586_CBC1  | 8.92E-06 |
| hsa_circ_0047479_CBC1 | 0.00127  | 3.001692799 | up | hsa_circ_0067582_CBC1  | 0.000184 |
| hsa_circ_0125622_CBC1 | 0.004426 | 2.439720045 | up | hsa_circ_0053666_CBC1  | 0.000357 |
| hsa_circ_0009546_CBC1 | 0.01837  | 2.004553091 | up | hsa_circ_0108949_CBC1  | 0.029333 |
| hsa_circ_0139072_CBC1 | 0.012978 | 2.055386646 | up | hsa_circ_0123017_CBC1  | 6.36E-06 |
| hsa_circ_0111938_CBC1 | 0.003971 | 2.193207233 | up | hsa-circRNA6924-43_CBC | 4.79E-05 |
| hsa_circ_0133505_CBC1 | 0.025922 | 2.036039861 | up | hsa_circ_0084359_CBC1  | 0.006058 |
| hsa_circ_0016434_CBC1 | 0.004463 | 2.313197041 | up | hsa_circ_0089925_CBC1  | 0.001948 |
| hsa_circ_0131694_CBC1 | 0.009836 | 2.253646883 | up | hsa_circ_0004501_CBC1  | 0.000118 |
| hsa_circ_0095667_CBC1 | 0.019715 | 2.313252028 | up | hsa_circ_0054812_CBC1  | 0.000349 |
| hsa_circ_0102994_CBC1 | 0.006038 | 2.07110109  | up | hsa-circRNA173-10_CBC1 | 0.007592 |
| hsa_circ_0055558_CBC1 | 0.015927 | 2.457247427 | up | hsa_circ_0052864_CBC1  | 5.54E-06 |
| hsa_circ_0139110_CBC1 | 0.028064 | 2.13514354  | up | hsa-circRNA12883-19_CB | 7.84E-05 |
| hsa_circ_0032850_CBC1 | 0.003902 | 2.14445558  | up | hsa_circ_0011209_CBC1  | 1.5E-05  |
| hsa_circ_0105415_CBC1 | 0.030657 | 2.299879984 | up | hsa_circ_0120458_CBC1  | 1.13E-05 |
| hsa_circ_0124405_CBC1 | 0.02442  | 2.334788811 | up | hsa_circ_0039695_CBC1  | 0.000369 |
| hsa_circ_0023109_CBC1 | 0.027567 | 2.697206984 | up | hsa_circ_0102589_CBC1  | 0.02004  |
| hsa_circ_0068317_CBC1 | 0.005905 | 2.008012485 | up | hsa_circ_0096940_CBC1  | 0.002586 |
| hsa_circ_0131721_CBC1 | 0.012294 | 2.909919006 | up | hsa-circRNA4684-20_CBC | 8.56E-05 |
| hsa_circ_0016433_CBC1 | 0.006706 | 2.05115801  | up | hsa_circ_0095207_CBC1  | 0.015894 |
| hsa_circ_0132400_CBC1 | 0.008005 | 2.165346112 | up | hsa-circRNA4625-35_CBC | 1.58E-05 |
| hsa_circ_0108852_CBC1 | 0.009401 | 2.006614656 | up | hsa_circ_0027594_CBC1  | 0.000147 |
| hsa-circRNA4838-43_CB | 0.010477 | 2.021941447 | up | hsa_circ_0125592_CBC1  | 0.000108 |
| hsa-circRNA10627-1_CB | 0.018498 | 2.451157467 | up | hsa-circRNA7019-5_CBC1 | 0.000686 |
| hsa_circ_0105486_CBC1 | 0.015841 | 2.589681243 | up | hsa-circRNA12521-28_CB | 0.002546 |
| hsa_circ_0123765_CBC1 | 0.046927 | 2.064953507 | up | hsa_circ_0134170_CBC1  | 0.002778 |
| hsa_circ_0094278_CBC1 | 0.022148 | 2.150061661 | up | hsa_circ_0056990_CBC1  | 0.001913 |
| hsa_circ_0081980_CBC1 | 0.014526 | 2.195701154 | up | hsa_circ_0083117_CBC1  | 0.000213 |
| hsa_circ_0021637_CBC1 | 0.047524 | 2.266489675 | up | hsa-circRNA5861-8_CBC1 | 0.000527 |
| hsa_circ_0135187_CBC1 | 0.00535  | 2.195831651 | up | hsa_circ_0114304_CBC1  | 0.005254 |
| hsa_circ_0105703_CBC1 | 0.020307 | 2.056884017 | up | hsa_circ_0000846_CBC1  | 0.000148 |
| hsa_circ_0073319_CBC1 | 0.007818 | 2.012398439 | up | hsa_circ_0015676_CBC1  | 0.001387 |
| hsa_circ_0026438_CBC1 | 0.011505 | 2.385687704 | up | hsa_circ_0096843_CBC1  | 0.000381 |

|                        |          |             |    |                        |          |
|------------------------|----------|-------------|----|------------------------|----------|
| hsa_circ_0105685_CBC1  | 0.046154 | 2.065802133 | up | hsa_circ_0114428_CBC1  | 3.36E-06 |
| hsa_circ_0065692_CBC1  | 0.005905 | 2.38678283  | up | hsa-circRNA4463-3_CBC1 | 0.000382 |
| hsa_circ_0138119_CBC1  | 0.029852 | 2.032524997 | up | hsa_circ_0083353_CBC1  | 0.030013 |
| hsa_circ_0122759_CBC1  | 0.038747 | 2.073702008 | up | hsa_circ_0057529_CBC1  | 0.000247 |
| hsa_circ_0054658_CBC1  | 0.019179 | 2.603200043 | up | hsa_circ_0013318_CBC1  | 0.002461 |
| hsa_circ_0126672_CBC1  | 0.040059 | 2.60454405  | up | hsa_circ_0132143_CBC1  | 1.32E-05 |
| hsa_circ_0090594_CBC1  | 0.030909 | 2.492832685 | up | hsa_circ_0132153_CBC1  | 0.000234 |
| hsa_circ_0128827_CBC1  | 0.022181 | 2.014279291 | up | hsa_circ_0087381_CBC1  | 6.1E-06  |
| hsa_circ_0085931_CBC1  | 0.04924  | 2.162966582 | up | hsa-circRNA2287_CBC1   | 0.001917 |
| hsa-circRNA15183-13_CI | 0.016851 | 2.214637218 | up | hsa_circ_0024282_CBC1  | 0.020172 |
| hsa-circRNA174-16_CBC  | 0.006807 | 2.049492624 | up | hsa_circ_0098946_CBC1  | 0.013407 |
| hsa-circRNA10508_CBC   | 0.025415 | 2.091812517 | up | hsa_circ_0123867_CBC1  | 0.00087  |
| hsa_circ_0051543_CBC1  | 0.011008 | 2.10828321  | up | hsa_circ_0067703_CBC1  | 2.48E-05 |
| hsa_circ_0119978_CBC1  | 0.00793  | 2.443295085 | up | hsa_circ_0047877_CBC1  | 0.000261 |
| hsa_circ_0061317_CBC1  | 0.031609 | 2.03545501  | up | hsa_circ_0117222_CBC1  | 9.58E-05 |
| hsa_circ_0043382_CBC1  | 0.045387 | 2.050908712 | up | hsa_circ_0087390_CBC1  | 0.001084 |
| hsa_circ_0018926_CBC1  | 0.037849 | 2.263681504 | up | hsa_circ_0135264_CBC1  | 0.000218 |
| hsa_circ_0092576_CBC1  | 0.049403 | 2.522045775 | up | hsa_circ_0071866_CBC1  | 4.64E-06 |
| hsa_circ_0069862_CBC1  | 0.027749 | 2.483603578 | up | hsa_circ_0071232_CBC1  | 0.010153 |
| hsa_circ_0031308_CBC1  | 0.016659 | 2.094253533 | up | hsa_circ_0028227_CBC1  | 2.43E-05 |
| hsa_circ_0040413_CBC1  | 0.032119 | 2.143679245 | up | hsa_circ_0140077_CBC1  | 2.86E-05 |
| hsa_circ_0103603_CBC1  | 0.016271 | 2.187139918 | up | hsa-circRNA4390-520_CB | 1.56E-05 |
| hsa_circ_0028886_CBC1  | 0.013063 | 2.630984479 | up | hsa_circ_0030728_CBC1  | 0.00033  |
| hsa_circ_0133936_CBC1  | 0.007367 | 2.463642203 | up | hsa_circ_0053810_CBC1  | 8.49E-05 |
| hsa_circ_0062596_CBC1  | 0.000766 | 3.782584827 | up | hsa_circ_0126894_CBC1  | 7.21E-06 |
| hsa_circ_0108723_CBC1  | 0.020241 | 2.683389306 | up | hsa_circ_0034359_CBC1  | 0.000151 |
| hsa_circ_0062839_CBC1  | 0.000958 | 2.032630397 | up | hsa_circ_0134291_CBC1  | 0.000539 |
| hsa_circ_0047238_CBC1  | 0.007482 | 2.133555921 | up | hsa-circRNA16072-4_CBC | 0.00017  |
| hsa_circ_0020488_CBC1  | 0.002203 | 2.344871933 | up | hsa-circRNA12505-2_CBC | 1.6E-06  |
| hsa-circRNA902-5_CBC1  | 0.002872 | 2.110987205 | up | hsa_circ_0078167_CBC1  | 0.000149 |
| hsa_circ_0103604_CBC1  | 0.003875 | 3.143519533 | up | hsa_circ_0123020_CBC1  | 0.003445 |
| hsa_circ_0067053_CBC1  | 0.001727 | 2.096145715 | up | hsa_circ_0096527_CBC1  | 0.000399 |
| hsa_circ_0023573_CBC1  | 0.008445 | 2.236553946 | up | hsa_circ_0123022_CBC1  | 3.32E-05 |
| hsa_circ_0096888_CBC1  | 0.040702 | 2.118980603 | up | hsa_circ_0091155_CBC1  | 0.000163 |
| hsa_circ_0037118_CBC1  | 0.016905 | 2.164892002 | up | hsa_circ_0129896_CBC1  | 8.06E-05 |
| hsa_circ_0113926_CBC1  | 0.01475  | 2.807124821 | up | hsa_circ_0098944_CBC1  | 0.001613 |
| hsa_circ_0025914_CBC1  | 0.025288 | 2.363052221 | up | hsa_circ_0138389_CBC1  | 0.000443 |
| hsa_circ_0134413_CBC1  | 0.015064 | 2.023112214 | up | hsa_circ_0124334_CBC1  | 0.0009   |
| hsa_circ_0071614_CBC1  | 0.006093 | 2.076689371 | up | hsa-circRNA9154-31_CBC | 6.31E-06 |
| hsa-circRNA6903-27_CB  | 0.029092 | 2.209531724 | up | hsa-circRNA2310-2_CBC1 | 0.001432 |
| hsa-circRNA15423-15_CI | 0.038293 | 2.151625268 | up | hsa_circ_0018370_CBC1  | 0.000406 |
| hsa_circ_0123616_CBC1  | 0.008921 | 2.422308393 | up | hsa_circ_0035657_CBC1  | 0.000239 |
| hsa-circRNA1708-2_CBC  | 0.020118 | 2.039236815 | up | hsa_circ_0101628_CBC1  | 0.000999 |
| hsa_circ_0097570_CBC1  | 0.011117 | 2.045068432 | up | hsa_circ_0029952_CBC1  | 0.001493 |
| hsa_circ_0129969_CBC1  | 0.030508 | 3.149442551 | up | hsa_circ_0040028_CBC1  | 0.003521 |
| hsa_circ_0101263_CBC1  | 0.028439 | 2.855325699 | up | hsa-circRNA7452-13_CBC | 0.000862 |
| hsa-circRNA6347-1_CBC  | 0.015935 | 2.005314707 | up | hsa_circ_0061362_CBC1  | 3.19E-05 |
| hsa-circRNA13646-5_CB  | 0.030591 | 2.21687719  | up | hsa_circ_0118394_CBC1  | 0.001503 |
| hsa_circ_0091427_CBC1  | 0.009534 | 2.189087339 | up | hsa-circRNA12505-26_CB | 0.000648 |
| hsa_circ_0035125_CBC1  | 0.008948 | 2.333871187 | up | hsa_circ_0030740_CBC1  | 1.89E-05 |

|                        |          |             |    |                         |          |
|------------------------|----------|-------------|----|-------------------------|----------|
| hsa_circ_0088219_CBC1  | 0.011059 | 2.049994824 | up | hsa_circ_0054778_CBC1   | 7.04E-05 |
| hsa_circ_0043656_CBC1  | 0.012263 | 2.526352057 | up | hsa_circ_0053598_CBC1   | 3.49E-05 |
| hsa_circ_0137009_CBC1  | 0.027392 | 2.027343102 | up | hsa_circ_0112543_CBC1   | 0.000132 |
| hsa_circ_0026141_CBC1  | 0.033208 | 2.297653263 | up | hsa_circ_0120514_CBC1   | 2.46E-05 |
| hsa_circ_0135295_CBC1  | 0.020183 | 2.165482977 | up | hsa_circ_0045403_CBC1   | 7.22E-05 |
| hsa_circ_0134852_CBC1  | 0.031603 | 2.712628438 | up | hsa_circ_0129075_CBC1   | 0.000822 |
| hsa_circ_0123330_CBC1  | 0.016826 | 2.126523843 | up | hsa-circRNA7360-9_CBC1  | 0.001083 |
| hsa_circ_0118211_CBC1  | 0.028424 | 2.337641989 | up | hsa_circ_0020152_CBC1   | 2.32E-05 |
| hsa_circ_0101206_CBC1  | 0.020332 | 2.174762629 | up | hsa-circRNA3000-14_CBC  | 0.000292 |
| hsa-circRNA9652-1_CBC  | 0.017739 | 3.110271597 | up | hsa_circ_0070594_CBC1   | 0.002136 |
| hsa_circ_0118648_CBC1  | 0.028818 | 2.312963118 | up | hsa-circRNA409-7_CBC1   | 7.49E-06 |
| hsa_circ_0005389_CBC1  | 0.029147 | 2.239453796 | up | hsa_circ_0033123_CBC1   | 0.000143 |
| hsa_circ_0083487_CBC1  | 0.029903 | 2.112854448 | up | hsa_circ_0129579_CBC1   | 0.000621 |
| hsa-circRNA3075-12_CB  | 0.049361 | 2.560392558 | up | hsa_circ_0111475_CBC1   | 0.005629 |
| hsa_circ_0080192_CBC1  | 0.01451  | 3.475251673 | up | hsa_circ_0003905_CBC1   | 0.000149 |
| hsa_circ_0094166_CBC1  | 0.041813 | 2.252087588 | up | hsa_circ_0000123_CBC1   | 0.012459 |
| hsa_circ_0095672_CBC1  | 0.009671 | 2.306317954 | up | hsa_circ_0023772_CBC1   | 0.000204 |
| hsa_circ_0133644_CBC1  | 0.019851 | 2.171251582 | up | hsa_circ_0078177_CBC1   | 0.000518 |
| hsa_circ_0123455_CBC1  | 0.008937 | 2.057839543 | up | hsa_circ_0069228_CBC1   | 3.4E-05  |
| hsa_circ_0135534_CBC1  | 0.007566 | 2.432645722 | up | hsa_circ_0012437_CBC1   | 0.000743 |
| hsa_circ_0118307_CBC1  | 0.027685 | 2.123689715 | up | hsa_circ_0067591_CBC1   | 3.39E-05 |
| hsa_circ_0132599_CBC1  | 0.02847  | 2.828146314 | up | hsa-circRNA14020-21_CB  | 1.74E-05 |
| hsa-circRNA13247-1_CB  | 0.044725 | 2.402455304 | up | hsa_circ_0119783_CBC1   | 9.44E-06 |
| hsa-circRNA15880-10_CI | 0.025858 | 2.9376502   | up | hsa_circ_0117499_CBC1   | 7.74E-05 |
| hsa_circ_0033034_CBC1  | 0.001007 | 2.461127629 | up | hsa_circ_0129900_CBC1   | 0.012711 |
| hsa_circ_0004878_CBC1  | 0.044017 | 2.803812149 | up | hsa_circ_0129187_CBC1   | 0.006381 |
| hsa-circRNA15561-1_CB  | 0.030826 | 2.015392728 | up | hsa_circ_0092247_CBC1   | 3.11E-05 |
| hsa_circ_0016523_CBC1  | 0.01192  | 2.042726386 | up | hsa_circ_0054860_CBC1   | 0.000504 |
|                        |          |             |    | hsa_circ_0029929_CBC1   | 0.03884  |
|                        |          |             |    | hsa_circ_0002088_CBC1   | 5.13E-05 |
|                        |          |             |    | hsa_circ_0101919_CBC1   | 0.000395 |
|                        |          |             |    | hsa_circ_0139211_CBC1   | 0.00044  |
|                        |          |             |    | hsa_circ_0118861_CBC1   | 6.1E-05  |
|                        |          |             |    | hsa_circ_0140560_CBC1   | 0.002029 |
|                        |          |             |    | hsa_circ_0085388_CBC1   | 0.010358 |
|                        |          |             |    | hsa_circ_0054090_CBC1   | 0.004073 |
|                        |          |             |    | hsa-circRNA12520-169_CI | 0.000326 |
|                        |          |             |    | hsa_circ_0005342_CBC1   | 0.001573 |
|                        |          |             |    | hsa_circ_0032444_CBC1   | 0.003367 |
|                        |          |             |    | hsa_circ_0072239_CBC1   | 1.06E-05 |
|                        |          |             |    | hsa_circ_0105105_CBC1   | 0.000187 |
|                        |          |             |    | hsa-circRNA9154-32_CBC  | 0.000198 |
|                        |          |             |    | hsa_circ_0046876_CBC1   | 0.000678 |
|                        |          |             |    | hsa_circ_0071853_CBC1   | 2.51E-05 |
|                        |          |             |    | hsa_circ_0016817_CBC1   | 0.018146 |
|                        |          |             |    | hsa_circ_0025933_CBC1   | 0.013515 |
|                        |          |             |    | hsa-circRNA14372-2_CBC  | 2.44E-06 |
|                        |          |             |    | hsa_circ_0054732_CBC1   | 1.24E-05 |
|                        |          |             |    | hsa_circ_0105815_CBC1   | 4.29E-06 |
|                        |          |             |    | hsa_circ_0102125_CBC1   | 0.002455 |



|                        |          |
|------------------------|----------|
| hsa_circ_0117151_CBC1  | 3.03E-05 |
| hsa_circ_0081732_CBC1  | 0.010471 |
| hsa_circ_0091154_CBC1  | 0.000129 |
| hsa_circ_0083115_CBC1  | 0.00024  |
| hsa_circ_0010538_CBC1  | 0.004466 |
| hsa_circ_0009133_CBC1  | 0.002692 |
| hsa_circ_0138401_CBC1  | 0.000773 |
| hsa_circ_0047651_CBC1  | 4.95E-05 |
| hsa_circ_0058169_CBC1  | 0.002015 |
| hsa_circ_0130030_CBC1  | 0.001321 |
| hsa_circ_0139187_CBC1  | 0.000369 |
| hsa_circ_0099707_CBC1  | 1.85E-05 |
| hsa_circ_0089932_CBC1  | 0.007613 |
| hsa_circ_0088295_CBC1  | 0.000663 |
| hsa_circ_0056406_CBC1  | 6.04E-05 |
| hsa_circ_0077235_CBC1  | 0.025548 |
| hsa_circ_0036790_CBC1  | 7.93E-05 |
| hsa_circ_0036820_CBC1  | 0.000132 |
| hsa-circRNA10656-78_CB | 2.06E-05 |
| hsa_circ_0011883_CBC1  | 0.002272 |
| hsa-circRNA2177-18_CBC | 0.000103 |
| hsa_circ_0027614_CBC1  | 0.0001   |
| hsa_circ_0035410_CBC1  | 0.000596 |
| hsa_circ_0025305_CBC1  | 0.004071 |
| hsa_circ_0039932_CBC1  | 6.13E-05 |
| hsa_circ_0139702_CBC1  | 0.000343 |
| hsa_circ_0066257_CBC1  | 4.65E-05 |
| hsa_circ_0092636_CBC1  | 0.000354 |
| hsa_circ_0132015_CBC1  | 0.005714 |
| hsa_circ_0073250_CBC1  | 0.00227  |
| hsa_circ_0094514_CBC1  | 0.003119 |
| hsa_circ_0101585_CBC1  | 0.005815 |
| hsa_circ_0036804_CBC1  | 2.82E-05 |
| hsa_circ_0127787_CBC1  | 0.000448 |
| hsa_circ_0106727_CBC1  | 0.000583 |
| hsa_circ_0077656_CBC1  | 5.39E-06 |
| hsa_circ_0097739_CBC1  | 6.26E-05 |
| hsa_circ_0054095_CBC1  | 0.000145 |
| hsa_circ_0120954_CBC1  | 0.003381 |
| hsa_circ_0104186_CBC1  | 0.003142 |
| hsa_circ_0125268_CBC1  | 0.002887 |
| hsa_circ_0123604_CBC1  | 0.000351 |
| hsa_circ_0056261_CBC1  | 0.000713 |
| hsa_circ_0122176_CBC1  | 0.000435 |
| hsa_circ_0123277_CBC1  | 0.000126 |
| hsa_circ_0073504_CBC1  | 0.0004   |
| hsa_circ_0073355_CBC1  | 0.000163 |
| hsa_circ_0068367_CBC1  | 3.45E-05 |
| hsa_circ_0001521_CBC1  | 9.58E-05 |
| hsa-circRNA1916-7_CBC1 | 0.000496 |

|                        |          |
|------------------------|----------|
| hsa_circ_0107540_CBC1  | 8.36E-05 |
| hsa_circ_0140078_CBC1  | 5.92E-05 |
| hsa_circ_0114306_CBC1  | 0.005881 |
| hsa_circ_0073641_CBC1  | 0.001448 |
| hsa_circ_0099516_CBC1  | 0.000289 |
| hsa-circRNA1531-24_CBC | 0.000552 |
| hsa_circ_0029778_CBC1  | 0.017471 |
| hsa_circ_0123028_CBC1  | 0.00012  |
| hsa_circ_0128618_CBC1  | 0.000354 |
| hsa_circ_0003471_CBC1  | 0.00032  |
| hsa_circ_0119784_CBC1  | 0.000278 |
| hsa_circ_0055614_CBC1  | 0.001015 |
| hsa-circRNA14317-3_CBC | 0.001068 |
| hsa_circ_0114302_CBC1  | 0.000299 |
| hsa_circ_0031657_CBC1  | 0.000678 |
| hsa_circ_0071860_CBC1  | 4.03E-05 |
| hsa-circRNA10051-11_CB | 0.012062 |
| hsa_circ_0069939_CBC1  | 0.00014  |
| hsa_circ_0139205_CBC1  | 0.004007 |
| hsa_circ_0032423_CBC1  | 0.000234 |
| hsa_circ_0121636_CBC1  | 0.000129 |
| hsa_circ_0053802_CBC1  | 0.00023  |
| hsa-circRNA1954-15_CBC | 0.007851 |
| hsa_circ_0028968_CBC1  | 0.00042  |
| hsa-circRNA8140-12_CBC | 0.00059  |
| hsa-circRNA6510-5_CBC1 | 0.000809 |
| hsa_circ_0009036_CBC1  | 0.000336 |
| hsa_circ_0132141_CBC1  | 0.000194 |
| hsa_circ_0015678_CBC1  | 0.000786 |
| hsa-circRNA6772-1_CBC1 | 0.002594 |
| hsa_circ_0119839_CBC1  | 0.000397 |
| hsa-circRNA10656-13_CB | 7.95E-06 |
| hsa_circ_0030810_CBC1  | 0.000307 |
| hsa_circ_0096650_CBC1  | 0.005173 |
| hsa_circ_0027800_CBC1  | 0.0015   |
| hsa-circRNA12520-29_CB | 5.69E-05 |
| hsa_circ_0106611_CBC1  | 0.005078 |
| hsa_circ_0120609_CBC1  | 0.000223 |
| hsa_circ_0060347_CBC1  | 7.83E-05 |
| hsa_circ_0092673_CBC1  | 0.000371 |
| hsa-circRNA3320-30_CBC | 0.000257 |
| hsa_circ_0099515_CBC1  | 0.000246 |
| hsa-circRNA4522-14_CBC | 1.19E-05 |
| hsa_circ_0101138_CBC1  | 0.000867 |
| hsa-circRNA14403-42_CB | 0.000241 |
| hsa_circ_0099436_CBC1  | 0.018738 |
| hsa-circRNA12505-38_CB | 5.63E-05 |
| hsa_circ_0072187_CBC1  | 0.00073  |
| hsa_circ_0099228_CBC1  | 0.012265 |
| hsa_circ_0093919_CBC1  | 0.000787 |

hsa\_circ\_0083423\_CBC1 0.003111  
hsa-circRNA6924-15\_CBC 0.001568  
hsa\_circ\_0135259\_CBC1 0.010604  
hsa\_circ\_0126961\_CBC1 0.001153  
hsa\_circ\_0053329\_CBC1 0.000238  
hsa\_circ\_0071220\_CBC1 0.000348  
hsa\_circ\_0007995\_CBC1 1.04E-05  
hsa\_circ\_0061360\_CBC1 2.8E-05  
hsa\_circ\_0073059\_CBC1 0.001628  
hsa\_circ\_0035897\_CBC1 7.22E-06  
hsa\_circ\_0130963\_CBC1 0.000211  
hsa-circRNA9001-1\_CBC1 0.000652  
hsa\_circ\_0128058\_CBC1 0.000671  
hsa-circRNA1028-54\_CBC 0.000124  
hsa\_circ\_0072190\_CBC1 0.001406  
hsa-circRNA4478-8\_CBC1 0.002221  
hsa\_circ\_0108760\_CBC1 0.006306  
hsa-circRNA12467-5\_CBC 0.000713  
hsa-circRNA11450-11\_CB 3.1E-05  
hsa\_circ\_0077273\_CBC1 0.001068  
hsa\_circ\_0070591\_CBC1 0.000363  
hsa\_circ\_0130032\_CBC1 0.000577  
hsa\_circ\_0078154\_CBC1 2.05E-05  
hsa\_circ\_0120566\_CBC1 9.79E-05  
hsa\_circ\_0028965\_CBC1 0.000125  
hsa\_circ\_0054723\_CBC1 9.74E-05  
hsa\_circ\_0119832\_CBC1 0.000542  
hsa\_circ\_0129561\_CBC1 0.001687  
hsa\_circ\_0078186\_CBC1 0.005009  
hsa\_circ\_0023771\_CBC1 0.00038  
hsa\_circ\_0028008\_CBC1 0.003976  
hsa\_circ\_0070424\_CBC1 0.000721  
hsa\_circ\_0023773\_CBC1 0.000529  
hsa\_circ\_0000284\_CBC1 0.001893  
hsa\_circ\_0084820\_CBC1 0.01158  
hsa\_circ\_0107665\_CBC1 0.041262  
hsa-circRNA6213-56\_CBC 0.000264  
hsa\_circ\_0081803\_CBC1 0.001252  
hsa\_circ\_0038250\_CBC1 0.001455  
hsa\_circ\_0053573\_CBC1 0.000185  
hsa\_circ\_0074189\_CBC1 1.48E-05  
hsa\_circ\_0072524\_CBC1 0.001718  
hsa-circRNA1562-8\_CBC1 0.000421  
hsa\_circ\_0030730\_CBC1 7.21E-05  
hsa-circRNA1905-2\_CBC1 0.000322  
hsa\_circ\_0075061\_CBC1 0.000854  
hsa-circRNA14469-6\_CBC 0.000149  
hsa-circRNA12828-2\_CBC 0.000337  
hsa\_circ\_0047374\_CBC1 0.000165  
hsa\_circ\_0099705\_CBC1 5.23E-05

|                       |          |
|-----------------------|----------|
| hsa_circ_0125468_CBC1 | 0.000184 |
| hsa_circ_0106620_CBC1 | 4.09E-05 |
| hsa_circ_0037903_CBC1 | 0.014671 |
| hsa-circRNA218-2_CBC1 | 0.000786 |
| hsa_circ_0139199_CBC1 | 0.00118  |
| hsa_circ_0064601_CBC1 | 8.75E-05 |

For Peer Review



## AD group.

| Fold change | Expression | circRNA       | P value  | Fold change | Expression | circRNA    | P value  |
|-------------|------------|---------------|----------|-------------|------------|------------|----------|
| 2.023054496 | down       | hsa_circ_0139 | 0.000539 | 2.169736    | down       | hsa_circ_0 | 0.002539 |
| 2.197986522 | down       | hsa_circ_0110 | 0.005288 | 2.44448     | down       | hsa_circ_0 | 9.81E-05 |
| 2.04830591  | down       | hsa_circ_0135 | 0.002675 | 2.102486    | down       | hsa_circ_0 | 0.000114 |
| 2.632583832 | down       | hsa-circRNA6  | 1.57E-05 | 2.247522    | down       | hsa_circ_0 | 0.015495 |
| 2.023156298 | down       | hsa_circ_0077 | 0.007166 | 2.068139    | down       | hsa_circ_0 | 0.010508 |
| 2.475378167 | down       | hsa-circRNA3  | 0.005767 | 2.221845    | down       | hsa-circRN | 0.000983 |
| 2.022807031 | down       | hsa_circ_0080 | 0.001363 | 2.084832    | down       | hsa_circ_0 | 1.69E-05 |
| 2.124061174 | down       | hsa_circ_0119 | 0.000135 | 2.086277    | down       | hsa-circRN | 0.005048 |
| 2.148151597 | down       | hsa_circ_0118 | 0.002188 | 2.428927    | down       | hsa-circRN | 0.001448 |
| 2.601877634 | down       | hsa_circ_0063 | 0.000413 | 2.019908    | down       | hsa_circ_0 | 2.76E-06 |
| 2.104609622 | down       | hsa_circ_0032 | 0.00169  | 2.042094    | down       | hsa_circ_0 | 0.000446 |
| 2.912275616 | down       | hsa_circ_0103 | 0.000289 | 2.009826    | down       | hsa_circ_0 | 0.00041  |
| 3.499141105 | down       | hsa_circ_0140 | 2.81E-05 | 3.25585     | down       | hsa_circ_0 | 0.000964 |
| 3.039964694 | down       | hsa-circRNA1  | 0.000215 | 2.066673    | down       | hsa_circ_0 | 0.003103 |
| 2.666843598 | down       | hsa_circ_0000 | 0.005709 | 2.286001    | down       | hsa_circ_0 | 0.001908 |
| 2.28668042  | down       | hsa_circ_0100 | 0.001833 | 2.628174    | down       | hsa-circRN | 8.36E-05 |
| 2.150890485 | down       | hsa_circ_0034 | 0.000817 | 2.144012    | down       | hsa_circ_0 | 0.003168 |
| 2.480752173 | down       | hsa_circ_0134 | 1.59E-05 | 2.035038    | down       | hsa_circ_0 | 4.34E-05 |
| 2.636116754 | down       | hsa-circRNA6  | 0.004386 | 2.247355    | down       | hsa_circ_0 | 0.002615 |
| 2.016153847 | down       | hsa-circRNA1  | 9.94E-05 | 2.229835    | down       | hsa_circ_0 | 7.69E-05 |
| 2.043364336 | down       | hsa_circ_0081 | 0.000369 | 2.025739    | down       | hsa_circ_0 | 0.000245 |
| 2.038152088 | down       | hsa-circRNA5  | 6.61E-06 | 2.159939    | down       | hsa_circ_0 | 0.00105  |
| 2.036396382 | down       | hsa_circ_0072 | 0.002001 | 2.064513    | down       | hsa_circ_0 | 9.7E-06  |
| 3.795624046 | down       | hsa_circ_0099 | 0.000361 | 2.083569    | down       | hsa_circ_0 | 6.68E-06 |
| 2.283984838 | down       | hsa_circ_0071 | 0.000414 | 3.68193     | down       | hsa_circ_0 | 0.000405 |
| 2.358383591 | down       | hsa_circ_0015 | 0.000131 | 2.07978     | down       | hsa_circ_0 | 4.48E-05 |
| 2.092309682 | down       | hsa_circ_0030 | 2.94E-05 | 2.131855    | down       | hsa_circ_0 | 0.000195 |
| 2.038393733 | down       | hsa_circ_0124 | 0.000396 | 2.037837    | down       | hsa_circ_0 | 0.00032  |
| 2.265727713 | down       | hsa_circ_0044 | 0.000284 | 2.082039    | down       | hsa_circ_0 | 0.000667 |
| 2.066253482 | down       | hsa_circ_0120 | 7.96E-07 | 2.15713     | down       | hsa_circ_0 | 0.000796 |
| 2.056885607 | down       | hsa_circ_0056 | 0.006645 | 2.037702    | down       | hsa_circ_0 | 0.001286 |
| 3.220091929 | down       | hsa-circRNA6  | 0.000278 | 2.127032    | down       | hsa-circRN | 0.001812 |
| 2.244835876 | down       | hsa_circ_0096 | 0.003447 | 2.707235    | down       | hsa_circ_0 | 0.012156 |
| 2.12818366  | down       | hsa_circ_0054 | 9.95E-06 | 2.203173    | down       | hsa_circ_0 | 0.001766 |
| 2.958925811 | down       | hsa_circ_0083 | 1.07E-05 | 2.130109    | down       | hsa_circ_0 | 0.000344 |
| 2.446758733 | down       | hsa_circ_0105 | 7.49E-06 | 2.518829    | down       | hsa_circ_0 | 0.010092 |
| 2.063681373 | down       | hsa_circ_0038 | 0.003977 | 2.141703    | down       | hsa_circ_0 | 1.91E-05 |
| 2.524906877 | down       | hsa-circRNA1  | 0.000205 | 2.139118    | down       | hsa-circRN | 0.003135 |
| 2.184625776 | down       | hsa_circ_0069 | 0.000554 | 2.926803    | down       | hsa_circ_0 | 9.04E-05 |
| 2.502770378 | down       | hsa-circRNA5  | 0.00073  | 2.090327    | down       | hsa_circ_0 | 1.74E-06 |
| 2.169236519 | down       | hsa_circ_0072 | 0.000985 | 2.117149    | down       | hsa_circ_0 | 4.31E-06 |
| 2.046918378 | down       | hsa-circRNA1  | 1.6E-07  | 2.887354    | down       | hsa_circ_0 | 2.43E-05 |
| 2.082151364 | down       | hsa_circ_0021 | 0.000574 | 2.012331    | down       | hsa_circ_0 | 0.000186 |
| 2.051389488 | down       | hsa-circRNA4  | 8.88E-05 | 2.124526    | down       | hsa-circRN | 0.000496 |
| 2.246169032 | down       | hsa_circ_0053 | 0.000412 | 2.161209    | down       | hsa_circ_0 | 0.000149 |
| 2.412347723 | down       | hsa-circRNA3  | 2.13E-05 | 2.515427    | down       | hsa_circ_0 | 9.9E-07  |
| 2.326338911 | down       | hsa_circ_0125 | 1.11E-06 | 2.23601     | down       | hsa_circ_0 | 0.035693 |
| 2.131252452 | down       | hsa_circ_0104 | 0.003428 | 2.010342    | down       | hsa-circRN | 4.37E-05 |

|             |      |               |          |          |      |               |          |
|-------------|------|---------------|----------|----------|------|---------------|----------|
| 2.033990225 | down | hsa_circ_0126 | 0.000351 | 2.28879  | down | hsa_circ_0126 | 3.98E-06 |
| 2.01675222  | down | hsa_circ_0072 | 1.37E-06 | 2.20714  | down | hsa_circ_0072 | 0.006846 |
| 2.682823004 | down | hsa_circ_0077 | 0.01388  | 2.600833 | down | hsa_circ_0077 | 0.000715 |
| 2.04030125  | down | hsa_circ_0024 | 5.65E-05 | 2.021677 | down | hsa_circ_0024 | 2.86E-05 |
| 2.030453881 | down | hsa_circ_0063 | 0.000287 | 2.160952 | down | hsa_circ_0063 | 0.004169 |
| 2.151450477 | down | hsa_circ_0073 | 1.47E-05 | 2.010953 | down | hsa_circ_0073 | 0.000454 |
| 2.4224946   | down | hsa-circRNA1  | 3.96E-05 | 2.106147 | down | hsa_circ_0073 | 0.000379 |
| 2.338218786 | down | hsa-circRNA1  | 0.019779 | 2.293067 | down | hsa_circ_0073 | 0.000399 |
| 2.308883171 | down | hsa_circ_0122 | 0.000125 | 2.112982 | down | hsa_circ_0122 | 0.001054 |
| 2.153237074 | down | hsa_circ_0118 | 0.026593 | 2.022292 | down | hsa_circ_0118 | 0.000458 |
| 2.161194436 | down | hsa_circ_0123 | 1.11E-05 | 2.27007  | down | hsa-circRN    | 0.001537 |
| 2.145208477 | down | hsa_circ_0119 | 0.001325 | 2.09554  | down | hsa_circ_0119 | 0.000233 |
| 2.64584922  | down | hsa-circRNA1  | 0.010358 | 2.070358 | down | hsa-circRN    | 6.98E-05 |
| 2.045449382 | down | hsa_circ_0062 | 0.010549 | 2.150657 | down | hsa_circ_0062 | 0.032652 |
| 2.599803949 | down | hsa_circ_0027 | 0.000352 | 2.172019 | down | hsa_circ_0027 | 0.000453 |
| 2.19191312  | down | hsa_circ_0027 | 0.000129 | 2.094395 | down | hsa_circ_0027 | 0.000297 |
| 2.013718621 | down | hsa_circ_0114 | 0.001743 | 2.336119 | down | hsa_circ_0114 | 0.000111 |
| 2.030443128 | down | hsa-circRNA7  | 0.032417 | 2.128936 | down | hsa_circ_0114 | 0.000401 |
| 2.038362433 | down | hsa_circ_0053 | 0.000423 | 2.058656 | down | hsa-circRN    | 1.29E-05 |
| 2.326360034 | down | hsa-circRNA1  | 0.003011 | 2.19942  | down | hsa_circ_0053 | 0.000274 |
| 2.581195381 | down | hsa_circ_0128 | 0.001963 | 2.232522 | down | hsa-circRN    | 0.000265 |
| 2.238005415 | down | hsa_circ_0111 | 0.013991 | 2.002151 | down | hsa_circ_0111 | 0.00042  |
| 2.394145524 | down | hsa-circRNA2  | 0.000565 | 2.552022 | down | hsa_circ_0111 | 0.000375 |
| 2.025098098 | down | hsa_circ_0054 | 0.00143  | 2.329108 | down | hsa-circRN    | 0.000186 |
| 2.239869036 | down | hsa-circRNA1  | 0.004409 | 2.378121 | down | hsa_circ_0054 | 0.000241 |
| 2.03203852  | down | hsa_circ_0003 | 1.83E-06 | 2.309859 | down | hsa_circ_0003 | 0.000715 |
| 2.377668531 | down | hsa_circ_0064 | 0.001544 | 2.068035 | down | hsa_circ_0064 | 0.000113 |
| 2.662972423 | down | hsa_circ_0139 | 0.002097 | 2.010661 | down | hsa_circ_0139 | 0.011737 |
| 2.669444389 | down | hsa-circRNA6  | 0.000169 | 2.196673 | down | hsa-circRN    | 0.001521 |
| 2.032513686 | down | hsa_circ_0094 | 0.000313 | 2.307582 | down | hsa-circRN    | 1.77E-05 |
| 3.174503433 | down | hsa_circ_0138 | 5.21E-05 | 2.352305 | down | hsa-circRN    | 0.001    |
| 2.232454084 | down | hsa_circ_0077 | 0.00073  | 2.13844  | down | hsa_circ_0077 | 1.06E-05 |
| 2.025521272 | down | hsa_circ_0135 | 0.000131 | 2.07839  | down | hsa_circ_0135 | 0.000516 |
| 2.027405602 | down | hsa-circRNA1  | 0.000132 | 2.305624 | down | hsa_circ_0135 | 0.000957 |
| 2.066699546 | down | hsa_circ_0054 | 0.000289 | 2.015828 | down | hsa_circ_0054 | 2.72E-05 |
| 2.035834527 | down | hsa_circ_0135 | 6.29E-05 | 2.249423 | down | hsa_circ_0135 | 0.000102 |
| 2.082771182 | down | hsa_circ_0070 | 0.00044  | 2.1115   | down | hsa_circ_0070 | 0.001012 |
| 2.057400625 | down | hsa_circ_0071 | 0.000136 | 2.098388 | down | hsa-circRN    | 5.45E-06 |
| 2.19930698  | down | hsa-circRNA9  | 3.09E-05 | 3.341624 | down | hsa_circ_0071 | 0.00023  |
| 2.260416558 | down | hsa_circ_0122 | 0.00357  | 2.059552 | down | hsa-circRN    | 0.017593 |
| 2.003613252 | down | hsa_circ_0102 | 0.007533 | 2.062857 | down | hsa_circ_0102 | 0.000124 |
| 2.39674569  | down | hsa_circ_0001 | 0.001287 | 2.429842 | down | hsa_circ_0001 | 1.52E-05 |
| 2.382276275 | down | hsa_circ_0017 | 9.16E-05 | 2.166443 | down | hsa_circ_0017 | 0.003589 |
| 2.41057388  | down | hsa-circRNA3  | 5.47E-07 | 2.702084 | down | hsa_circ_0017 | 0.003589 |
| 2.418078732 | down | hsa_circ_0071 | 0.00152  | 2.302807 | down | hsa_circ_0071 | 0.000679 |
| 2.167038555 | down | hsa_circ_0075 | 0.00206  | 2.221574 | down | hsa_circ_0075 | 0.000363 |
| 2.553233326 | down | hsa_circ_0030 | 0.000351 | 2.073641 | down | hsa_circ_0030 | 0.039481 |
| 2.555094189 | down | hsa_circ_0123 | 2.24E-05 | 2.200923 | down | hsa-circRN    | 0.000526 |
| 2.039997524 | down | hsa_circ_0119 | 0.000678 | 2.031662 | down | hsa_circ_0119 | 0.001223 |
| 2.057042145 | down | hsa_circ_0053 | 0.000108 | 2.163276 | down | hsa_circ_0053 | 3.82E-05 |

|             |      |               |          |          |      |            |          |
|-------------|------|---------------|----------|----------|------|------------|----------|
| 2.956733696 | down | hsa_circ_0072 | 0.000328 | 2.023325 | down | hsa_circ_0 | 0.00017  |
| 2.003390476 | down | hsa_circ_0082 | 0.000204 | 2.101677 | down | hsa-circRN | 0.000227 |
| 2.130097506 | down | hsa_circ_0072 | 8.78E-05 | 3.033051 | down | hsa_circ_0 | 0.001076 |
| 2.163908813 | down | hsa_circ_0130 | 9.52E-05 | 2.005948 | down | hsa_circ_0 | 0.011443 |
| 2.361327563 | down | hsa_circ_0053 | 0.000112 | 2.008317 | down | hsa_circ_0 | 9.67E-06 |
| 2.127055532 | down | hsa_circ_0127 | 0.000119 | 2.281833 | down | hsa-circRN | 0.000883 |
| 2.105133363 | down | hsa_circ_0058 | 0.002699 | 2.01346  | down | hsa_circ_0 | 0.002238 |
| 2.427537358 | down | hsa_circ_0018 | 0.035876 | 2.310469 | down | hsa_circ_0 | 1.9E-05  |
| 2.059448513 | down | hsa_circ_0105 | 6.02E-05 | 3.061368 | down | hsa_circ_0 | 0.000448 |
| 2.109755856 | down | hsa_circ_0081 | 0.000252 | 2.73712  | down | hsa_circ_0 | 3.74E-06 |
| 2.122946157 | down | hsa_circ_0132 | 0.000971 | 2.011837 | down | hsa_circ_0 | 0.003677 |
| 2.330658562 | down | hsa_circ_0035 | 0.000664 | 2.175494 | down | hsa_circ_0 | 0.000384 |
| 2.118535688 | down | hsa_circ_0125 | 0.005999 | 3.294617 | down | hsa-circRN | 0.000343 |
| 2.702771359 | down | hsa_circ_0044 | 2.2E-05  | 2.391926 | down | hsa_circ_0 | 2.86E-05 |
| 2.049631834 | down | hsa-circRNA7  | 2.75E-05 | 2.130751 | down | hsa-circRN | 6.04E-05 |
| 2.061478336 | down | hsa-circRNA1  | 0.00057  | 2.36617  | down | hsa_circ_0 | 4.91E-05 |
| 2.262250428 | down | hsa_circ_0085 | 0.000565 | 2.926515 | down | hsa-circRN | 0.000383 |
| 2.253237066 | down | hsa_circ_0137 | 0.002372 | 2.19393  | down | hsa-circRN | 9.82E-05 |
| 2.16653407  | down | hsa-circRNA6  | 0.000196 | 2.083907 | down | hsa_circ_0 | 0.000346 |
| 2.250553657 | down | hsa_circ_0084 | 0.005857 | 2.567755 | down | hsa_circ_0 | 0.000308 |
| 2.088950488 | down | hsa_circ_0057 | 0.030835 | 2.030611 | down | hsa_circ_0 | 0.001729 |
| 2.143102721 | down | hsa_circ_0057 | 0.002099 | 2.122185 | down | hsa_circ_0 | 9.33E-05 |
| 2.022639619 | down | hsa_circ_0096 | 0.000412 | 2.133169 | down | hsa_circ_0 | 0.000156 |
| 2.217845863 | down | hsa-circRNA1  | 5.92E-05 | 2.704131 | down | hsa_circ_0 | 0.000535 |
| 2.021412664 | down | hsa_circ_0023 | 0.002455 | 2.063774 | down | hsa_circ_0 | 0.000406 |
| 2.177081112 | down | hsa_circ_0081 | 0.000231 | 2.242879 | down | hsa_circ_0 | 0.000113 |
| 2.098445289 | down | hsa_circ_0101 | 0.000712 | 2.132211 | down | hsa_circ_0 | 6.97E-06 |
| 2.174215491 | down | hsa-circRNA4  | 0.000178 | 2.274914 | down | hsa_circ_0 | 0.002724 |
| 2.00647575  | down | hsa_circ_0136 | 5.93E-06 | 3.336992 | down | hsa-circRN | 4.13E-05 |
| 2.353301506 | down | hsa-circRNA1  | 1.53E-05 | 2.239402 | down | hsa_circ_0 | 0.003724 |
| 2.034943276 | down | hsa-circRNA4  | 0.000102 | 2.128797 | down | hsa_circ_0 | 0.003878 |
| 2.11198154  | down | hsa_circ_0102 | 0.000706 | 2.581942 | down | hsa_circ_0 | 3.26E-05 |
| 2.039028416 | down | hsa_circ_0065 | 0.032753 | 2.050571 | down | hsa_circ_0 | 0.001313 |
| 2.041131313 | down | hsa_circ_0083 | 0.000966 | 2.059079 | down | hsa-circRN | 0.000178 |
| 2.012448643 | down | hsa_circ_0023 | 0.001953 | 2.38717  | down | hsa_circ_0 | 0.006251 |
| 2.032129473 | down | hsa_circ_0015 | 0.000396 | 2.436977 | down | hsa_circ_0 | 0.000229 |
| 2.066825377 | down | hsa-circRNA7  | 2.62E-05 | 2.060311 | down | hsa_circ_0 | 0.002317 |
| 2.02691721  | down | hsa_circ_0021 | 8.8E-05  | 2.195235 | down | hsa_circ_0 | 2.83E-05 |
| 3.653824503 | down | hsa-circRNA8  | 0.000874 | 2.072611 | down | hsa-circRN | 2.55E-05 |
| 2.791494319 | down | hsa_circ_0116 | 1.63E-05 | 2.110551 | down | hsa-circRN | 3.19E-05 |
| 2.310060879 | down | hsa_circ_0101 | 0.000413 | 2.172613 | down | hsa_circ_0 | 0.015117 |
| 2.197010693 | down | hsa_circ_0122 | 0.000153 | 2.065798 | down | hsa-circRN | 9.5E-05  |
| 2.018238194 | down | hsa_circ_0078 | 0.00052  | 2.20477  | down | hsa_circ_0 | 0.001784 |
| 2.025692788 | down | hsa_circ_0023 | 0.000873 | 2.021762 | down | hsa_circ_0 | 0.005745 |
| 2.105002844 | down | hsa_circ_0030 | 7.2E-05  | 2.065207 | down | hsa_circ_0 | 0.001028 |
| 2.043326209 | down | hsa-circRNA1  | 3.38E-05 | 2.365972 | down | hsa_circ_0 | 0.000161 |
| 2.319655222 | down | hsa_circ_0101 | 0.000422 | 2.307763 | down | hsa_circ_0 | 0.000705 |
| 2.366051069 | down | hsa_circ_0013 | 0.000316 | 2.550096 | down | hsa_circ_0 | 5.04E-05 |
| 2.567394635 | down | hsa_circ_0068 | 9.19E-06 | 2.118937 | down | hsa_circ_0 | 0.000471 |
| 2.032624733 | down | hsa_circ_0070 | 0.000159 | 2.375152 | down | hsa_circ_0 | 0.000482 |

|             |      |               |          |          |      |            |          |
|-------------|------|---------------|----------|----------|------|------------|----------|
| 2.016117435 | down | hsa-circRNA6  | 3.76E-06 | 3.161978 | down | hsa-circRN | 0.001448 |
| 2.086717429 | down | hsa_circ_013C | 4.83E-06 | 2.126915 | down | hsa_circ_0 | 0.000627 |
| 2.163963144 | down | hsa-circRNA9  | 0.001381 | 2.191203 | down | hsa_circ_0 | 0.000449 |
| 2.01490853  | down | hsa_circ_012C | 4.22E-05 | 2.358939 | down | hsa-circRN | 2.78E-06 |
| 2.259142669 | down | hsa_circ_0122 | 4.13E-05 | 2.259514 | down | hsa_circ_0 | 0.000629 |
| 2.04294516  | down | hsa_circ_0122 | 0.000222 | 2.019663 | down | hsa-circRN | 0.000887 |
| 2.324347941 | down | hsa_circ_0126 | 8.92E-06 | 2.613819 | down | hsa_circ_0 | 7.97E-06 |
| 2.007172442 | down | hsa_circ_0083 | 2.79E-05 | 2.116284 | down | hsa-circRN | 1.44E-05 |
| 2.081835403 | down | hsa_circ_0013 | 6.23E-05 | 2.415389 | down | hsa_circ_0 | 4.99E-06 |
| 2.478768728 | down | hsa_circ_0057 | 0.015901 | 2.506822 | down | hsa_circ_0 | 4.88E-05 |
| 3.009035227 | down | hsa-circRNA2  | 0.000258 | 2.016816 | down | hsa_circ_0 | 0.000508 |
| 2.436802706 | down | hsa_circ_007C | 0.00015  | 2.642473 | down | hsa_circ_0 | 0.000689 |
| 2.375113715 | down | hsa_circ_0111 | 0.002965 | 2.347065 | down | hsa-circRN | 6.28E-05 |
| 2.05592942  | down | hsa_circ_0073 | 0.000323 | 2.252655 | down | hsa_circ_0 | 9.26E-05 |
| 2.250731109 | down | hsa_circ_0078 | 0.001815 | 2.027476 | down | hsa_circ_0 | 0.000537 |
| 2.062833569 | down | hsa_circ_0037 | 0.000128 | 2.214606 | down | hsa_circ_0 | 0.001364 |
| 2.179996883 | down | hsa-circRNA6  | 0.000441 | 2.316257 | down | hsa_circ_0 | 0.000356 |
| 2.037893787 | down | hsa_circ_0126 | 0.001775 | 2.754718 | down | hsa_circ_0 | 0.000392 |
| 2.038250008 | down | hsa_circ_0053 | 0.000438 | 2.075959 | down | hsa-circRN | 0.000224 |
| 2.177745982 | down | hsa_circ_0047 | 0.000257 | 2.306373 | down | hsa_circ_0 | 0.000804 |
| 2.056270688 | down | hsa_circ_0063 | 0.000264 | 2.071231 | down | hsa_circ_0 | 0.000321 |
| 2.253489339 | down | hsa_circ_0095 | 0.013615 | 2.135097 | down | hsa_circ_0 | 7.23E-06 |
| 2.291428314 | down | hsa-circRNA1  | 1.19E-08 | 2.060513 | down | hsa_circ_0 | 0.000699 |
| 2.078847692 | down | hsa-circRNA9  | 4.32E-05 | 2.4567   | down | hsa-circRN | 3E-05    |
| 2.166873167 | down | hsa_circ_0085 | 0.000217 | 2.725332 | down | hsa_circ_0 | 0.000217 |
| 2.034477705 | down | hsa-circRNA1  | 0.002526 | 2.318606 | down | hsa_circ_0 | 0.008047 |
| 2.107485703 | down | hsa_circ_012C | 0.006863 | 2.037797 | down | hsa_circ_0 | 0.000566 |
| 2.104632341 | down | hsa_circ_0071 | 0.045844 | 2.039069 | down | hsa_circ_0 | 4.03E-06 |
| 2.257694014 | down | hsa-circRNA9  | 0.008925 | 2.429718 | down | hsa-circRN | 0.000612 |
| 2.049320064 | down | hsa_circ_0072 | 0.000608 | 2.257618 | down | hsa_circ_0 | 0.033634 |
| 2.196455097 | down | hsa_circ_0001 | 0.005958 | 2.618255 | down | hsa_circ_0 | 0.006054 |
| 2.280444168 | down | hsa_circ_0125 | 0.000168 | 2.506636 | down | hsa-circRN | 0.00043  |
| 2.484968092 | down | hsa_circ_0024 | 0.000371 | 2.193177 | down | hsa_circ_0 | 0.000972 |
| 2.22946402  | down | hsa_circ_0054 | 2.86E-05 | 2.378488 | down | hsa-circRN | 3.67E-05 |
| 2.065442448 | down | hsa_circ_0084 | 0.000698 | 2.147762 | down | hsa_circ_0 | 0.000119 |
| 2.213424408 | down | hsa_circ_0137 | 0.010858 | 2.041005 | down | hsa_circ_0 | 4.33E-05 |
| 2.048045927 | down | hsa_circ_0114 | 0.002308 | 2.000291 | down | hsa_circ_0 | 1.14E-05 |
| 2.456736926 | down | hsa_circ_0127 | 6.32E-05 | 2.10398  | down | hsa_circ_0 | 0.000149 |
| 2.226994673 | down | hsa_circ_0117 | 0.00011  | 2.161643 | down | hsa_circ_0 | 0.000462 |
| 2.051893702 | down | hsa_circ_0053 | 0.001018 | 2.141837 | down | hsa-circRN | 0.000106 |
| 2.109199743 | down | hsa_circ_0071 | 0.001287 | 2.021605 | down | hsa_circ_0 | 0.00102  |
| 2.335149115 | down | hsa_circ_0137 | 1.11E-05 | 2.364669 | down | hsa-circRN | 0.000431 |
| 2.048717828 | down | hsa_circ_0105 | 0.000531 | 2.011371 | down | hsa_circ_0 | 0.011541 |
| 2.575822208 | down | hsa_circ_0001 | 0.002076 | 2.104166 | down | hsa_circ_0 | 0.000111 |
| 2.038569903 | down | hsa_circ_013C | 0.000241 | 2.687892 | down | hsa_circ_0 | 0.042868 |
| 2.220463119 | down | hsa_circ_0025 | 0.001328 | 2.509513 | down | hsa-circRN | 0.00215  |
| 2.374234635 | down | hsa_circ_0007 | 2.28E-05 | 2.42757  | down | hsa_circ_0 | 0.000335 |
| 2.112206898 | down | hsa-circRNA1  | 0.000485 | 2.078678 | down | hsa_circ_0 | 3.4E-05  |
| 2.139185845 | down | hsa_circ_0086 | 0.006507 | 2.062909 | down | hsa_circ_0 | 0.000936 |
| 2.133802051 | down | hsa-circRNA6  | 0.000198 | 2.053949 | down | hsa-circRN | 0.000104 |



|             |      |               |          |          |      |            |          |
|-------------|------|---------------|----------|----------|------|------------|----------|
| 3.105382599 | down | hsa-circRNA1  | 0.000229 | 2.132941 | down | hsa_circ_0 | 0.000222 |
| 2.08032837  | down | hsa_circ_0115 | 0.000677 | 2.094313 | down | hsa_circ_0 | 3.64E-05 |
| 2.161149864 | down | hsa-circRNA6  | 0.000283 | 2.038604 | down | hsa-circRN | 0.000127 |
| 2.040017437 | down | hsa_circ_0022 | 0.00167  | 2.050796 | down | hsa_circ_0 | 0.000291 |
| 2.480133673 | down | hsa-circRNA1  | 3.85E-05 | 2.487648 | down | hsa-circRN | 0.003544 |
| 2.033990456 | down | hsa_circ_0105 | 2.12E-05 | 2.277903 | down | hsa-circRN | 6.66E-06 |
| 2.010990613 | down | hsa_circ_0075 | 6.85E-05 | 2.177496 | down | hsa_circ_0 | 9.1E-05  |
| 2.292256233 | down | hsa_circ_0068 | 0.000405 | 2.110338 | down | hsa_circ_0 | 1.52E-06 |
| 2.183414511 | down | hsa_circ_0013 | 0.017895 | 2.053831 | down | hsa_circ_0 | 0.000206 |
| 2.310325534 | down | hsa_circ_0115 | 0.035853 | 2.068666 | down | hsa-circRN | 0.000411 |
| 2.439397261 | down | hsa_circ_0105 | 0.001356 | 2.421048 | down | hsa_circ_0 | 0.000222 |
| 2.716130241 | down | hsa-circRNA1  | 0.000669 | 2.234464 | down | hsa-circRN | 2.87E-05 |
| 2.15714674  | down | hsa_circ_0013 | 0.000288 | 2.103032 | down | hsa_circ_0 | 0.001328 |
| 2.206647878 | down | hsa-circRNA9  | 0.005374 | 2.083369 | down | hsa-circRN | 3.85E-05 |
| 2.306130133 | down | hsa-circRNA1  | 0.003621 | 2.05941  | down | hsa_circ_0 | 0.00179  |
| 2.077436888 | down | hsa-circRNA1  | 7.95E-05 | 2.979555 | down | hsa_circ_0 | 0.00052  |
| 2.221089306 | down | hsa_circ_0108 | 0.000145 | 2.368431 | down | hsa_circ_0 | 0.000887 |
| 2.223543463 | down | hsa_circ_0065 | 0.000808 | 2.022173 | down | hsa_circ_0 | 0.00023  |
| 2.320832908 | down | hsa_circ_0084 | 1.62E-05 | 2.065282 | down | hsa-circRN | 1.29E-05 |
| 2.035463375 | down | hsa_circ_0126 | 0.000336 | 2.213406 | down | hsa_circ_0 | 6.74E-06 |
| 2.562342675 | down | hsa_circ_0003 | 6.31E-05 | 2.508891 | down | hsa_circ_0 | 0.003687 |
| 2.076841347 | down | hsa_circ_0127 | 0.006382 | 2.092391 | down | hsa-circRN | 0.00032  |
| 2.199274552 | down | hsa_circ_0135 | 0.000196 | 2.11918  | down | hsa-circRN | 3.07E-06 |
| 2.109624573 | down | hsa_circ_0060 | 2E-05    | 2.20127  | down | hsa-circRN | 0.007638 |
| 2.010034497 | down | hsa-circRNA3  | 0.001899 | 2.091329 | down | hsa_circ_0 | 0.000246 |
| 2.309226196 | down | hsa-circRNA1  | 6.88E-05 | 2.019995 | down | hsa_circ_0 | 8.27E-06 |
| 2.188453199 | down | hsa_circ_0073 | 0.000152 | 2.210137 | down | hsa_circ_0 | 0.001918 |
| 2.096124743 | down | hsa_circ_0027 | 0.001526 | 2.526886 | down | hsa-circRN | 0.000202 |
| 2.133458526 | down | hsa-circRNA8  | 9.38E-05 | 2.265762 | down | hsa-circRN | 0.006053 |
| 2.263633171 | down | hsa_circ_0106 | 0.002399 | 2.087696 | down | hsa_circ_0 | 0.003696 |
| 2.07277556  | down | hsa_circ_0074 | 3.96E-05 | 2.122021 | down | hsa_circ_0 | 0.000854 |
| 2.393035733 | down | hsa_circ_0100 | 0.001053 | 2.168756 | down | hsa-circRN | 1.06E-05 |
| 2.462175195 | down | hsa_circ_0008 | 0.004221 | 2.088513 | down | hsa_circ_0 | 0.0002   |
| 2.388677079 | down | hsa_circ_0125 | 0.003084 | 2.454485 | down | hsa_circ_0 | 0.000549 |
| 2.182957198 | down | hsa_circ_0102 | 0.000482 | 2.063285 | down | hsa_circ_0 | 0.000267 |
| 2.197363585 | down | hsa-circRNA1  | 5.11E-05 | 2.132582 | down | hsa_circ_0 | 0.01121  |
| 2.067443388 | down | hsa_circ_0135 | 2.24E-06 | 2.19609  | down | hsa_circ_0 | 1.15E-05 |
| 2.028622493 | down | hsa_circ_0025 | 6.76E-06 | 2.405319 | down | hsa_circ_0 | 0.000665 |
| 2.276682729 | down | hsa_circ_0012 | 0.000255 | 2.430243 | down | hsa_circ_0 | 0.030231 |
| 2.158057974 | down | hsa_circ_0128 | 0.003974 | 2.519032 | down | hsa_circ_0 | 0.002548 |
| 2.168787584 | down | hsa_circ_0083 | 6.22E-06 | 2.143866 | down | hsa_circ_0 | 0.000472 |
| 2.353252125 | down | hsa_circ_0111 | 0.001885 | 2.187008 | down | hsa_circ_0 | 0.013598 |
| 2.148968862 | down | hsa-circRNA1  | 0.000869 | 2.437173 | down | hsa_circ_0 | 2.95E-05 |
| 2.431549968 | down | hsa_circ_0120 | 0.010748 | 2.348012 | down | hsa-circRN | 0.000744 |
| 2.216909109 | down | hsa_circ_0138 | 0.00017  | 2.033975 | down | hsa_circ_0 | 7.6E-06  |
| 2.195777733 | down | hsa_circ_0121 | 0.00033  | 2.133146 | down | hsa_circ_0 | 0.01011  |
| 2.036532508 | down | hsa_circ_0094 | 2.1E-05  | 2.113761 | down | hsa-circRN | 0.00058  |
| 2.138638193 | down | hsa_circ_0117 | 0.007406 | 2.10962  | down | hsa_circ_0 | 0.005237 |
| 2.489622101 | down | hsa_circ_0114 | 0.000488 | 2.181772 | down | hsa-circRN | 0.003213 |
| 3.059974151 | down | hsa_circ_0000 | 0.000774 | 2.213438 | down | hsa_circ_0 | 0.000195 |

|             |      |               |          |          |      |            |          |
|-------------|------|---------------|----------|----------|------|------------|----------|
| 2.235001446 | down | hsa_circ_0094 | 7.4E-05  | 2.669143 | down | hsa-circRN | 0.001437 |
| 2.454300421 | down | hsa_circ_0074 | 0.000432 | 2.267416 | down | hsa-circRN | 7.81E-06 |
| 2.062032809 | down | hsa-circRNA6  | 0.00058  | 2.378111 | down | hsa-circRN | 0.000134 |
| 2.067948849 | down | hsa_circ_0054 | 0.000357 | 2.085388 | down | hsa_circ_0 | 0.001039 |
| 2.333177461 | down | hsa_circ_0115 | 1.62E-05 | 2.010983 | down | hsa_circ_0 | 1.06E-05 |
| 2.468210637 | down | hsa_circ_0140 | 0.000261 | 2.198879 | down | hsa_circ_0 | 0.000104 |
| 2.033800926 | down | hsa_circ_0001 | 0.032706 | 2.198774 | down | hsa_circ_0 | 6.56E-05 |
| 2.251604842 | down | hsa_circ_0138 | 0.000633 | 2.059866 | down | hsa_circ_0 | 2.32E-05 |
| 2.293967773 | down | hsa_circ_0027 | 5.88E-05 | 2.295319 | down | hsa_circ_0 | 5.02E-06 |
| 2.207921927 | down | hsa_circ_0035 | 8.56E-05 | 2.163785 | down | hsa-circRN | 6.95E-05 |
| 2.017977808 | down | hsa_circ_0071 | 0.000711 | 2.098037 | down | hsa_circ_0 | 0.000329 |
| 2.020341161 | down | hsa_circ_0053 | 0.000179 | 2.052742 | down | hsa_circ_0 | 5.2E-06  |
| 2.053007404 | down | hsa_circ_0012 | 0.000193 | 2.092507 | down | hsa_circ_0 | 0.010294 |
| 2.304488835 | down | hsa_circ_0084 | 0.005278 | 2.182786 | down | hsa_circ_0 | 0.044582 |
| 2.126804333 | down | hsa_circ_0140 | 0.000122 | 2.38949  | down | hsa_circ_0 | 1.34E-05 |
| 2.419010755 | down | hsa_circ_0091 | 0.001105 | 2.283173 | down | hsa_circ_0 | 3.05E-07 |
| 2.176490824 | down | hsa-circRNA4  | 0.000101 | 2.285826 | down | hsa_circ_0 | 6.36E-05 |
| 2.553446236 | down | hsa_circ_0128 | 3.66E-05 | 2.030687 | down | hsa_circ_0 | 0.000173 |
| 2.049674195 | down | hsa_circ_0115 | 0.000449 | 2.173372 | down | hsa-circRN | 0.002556 |
| 2.061070185 | down | hsa_circ_0027 | 0.000725 | 2.222517 | down | hsa_circ_0 | 7.31E-05 |
| 2.187294496 | down | hsa_circ_0054 | 0.000571 | 2.454872 | down | hsa-circRN | 8.1E-05  |
| 2.068125467 | down | hsa_circ_0056 | 0.00017  | 2.18553  | down | hsa_circ_0 | 0.004716 |
| 2.099758519 | down | hsa_circ_0124 | 0.008386 | 4.556577 | down | hsa_circ_0 | 0.001514 |
| 2.008275109 | down | hsa_circ_0090 | 0.002105 | 2.003745 | down | hsa_circ_0 | 0.001126 |
| 2.578391621 | down | hsa-circRNA1  | 4.14E-05 | 3.060651 | down | hsa_circ_0 | 0.002334 |
| 2.12798848  | down | hsa_circ_0123 | 1.41E-05 | 2.234604 | down | hsa_circ_0 | 0.002719 |
| 2.372939149 | down | hsa_circ_0127 | 1.95E-05 | 2.823071 | down | hsa_circ_0 | 0.000355 |
| 2.113578936 | down | hsa-circRNA1  | 5.39E-05 | 2.073472 | down | hsa-circRN | 0.001371 |
| 2.436809627 | down | hsa_circ_0043 | 0.00229  | 2.033889 | down | hsa_circ_0 | 9.22E-06 |
| 2.822358825 | down | hsa_circ_0001 | 0.006758 | 2.340064 | down | hsa_circ_0 | 0.000626 |
| 2.471438115 | down | hsa_circ_0095 | 0.000204 | 2.047405 | down | hsa_circ_0 | 0.000733 |
| 2.116587968 | down | hsa_circ_0053 | 0.000183 | 2.062958 | down | hsa_circ_0 | 0.006852 |
| 2.027797566 | down | hsa_circ_0115 | 1.29E-05 | 2.812334 | down | hsa_circ_0 | 0.003632 |
| 2.038038062 | down | hsa_circ_0123 | 6.12E-06 | 2.130751 | down | hsa_circ_0 | 6.3E-05  |
| 2.133069567 | down | hsa_circ_0102 | 0.038124 | 2.142823 | down | hsa_circ_0 | 0.00301  |
| 2.147406251 | down | hsa_circ_0053 | 2.77E-05 | 2.43423  | down | hsa-circRN | 0.000425 |
| 2.190886649 | down | hsa_circ_0077 | 0.000668 | 2.014331 | down | hsa_circ_0 | 0.004561 |
| 2.043980221 | down | hsa_circ_0085 | 0.000124 | 2.120846 | down | hsa_circ_0 | 8.61E-05 |
| 2.367224138 | down | hsa_circ_0072 | 0.000636 | 2.650756 | down | hsa_circ_0 | 5.62E-06 |
| 2.56541171  | down | hsa_circ_0071 | 0.00077  | 2.058888 | down | hsa_circ_0 | 4.51E-05 |
| 2.120684295 | down | hsa_circ_0016 | 0.002218 | 2.192142 | down | hsa_circ_0 | 0.002235 |
| 2.081827962 | down | hsa_circ_0118 | 0.008211 | 2.088239 | down | hsa_circ_0 | 0.013559 |
| 2.502995028 | down | hsa-circRNA3  | 0.00044  | 2.036484 | down | hsa_circ_0 | 0.000198 |
| 3.319915296 | down | hsa_circ_0004 | 0.002108 | 2.091609 | down | hsa_circ_0 | 0.004254 |
| 2.171672474 | down | hsa_circ_0135 | 0.000114 | 2.255523 | down | hsa_circ_0 | 0.000161 |
| 2.071295766 | down | hsa_circ_0102 | 6.57E-05 | 2.29339  | down | hsa_circ_0 | 0.027705 |
| 2.146322128 | down | hsa_circ_0017 | 0.00338  | 2.082848 | down | hsa-circRN | 0.003413 |
| 2.305469192 | down | hsa_circ_0121 | 0.009408 | 2.170803 | down | hsa_circ_0 | 1.55E-05 |
| 2.426320236 | down | hsa_circ_0002 | 0.000179 | 2.112333 | down | hsa_circ_0 | 0.001019 |
| 2.808074256 | down | hsa_circ_0025 | 9.71E-05 | 2.189565 | down | hsa-circRN | 0.000245 |

|             |      |               |          |          |      |            |          |
|-------------|------|---------------|----------|----------|------|------------|----------|
| 2.336082186 | down | hsa-circRNA7  | 9.41E-05 | 2.000921 | down | hsa_circ_0 | 0.000442 |
| 2.00361551  | down | hsa_circ_0125 | 4.74E-05 | 3.096305 | down | hsa_circ_0 | 0.000185 |
| 2.083233636 | down | hsa_circ_0094 | 0.000664 | 2.155101 | down | hsa_circ_0 | 0.003191 |
| 2.112485447 | down | hsa-circRNA5  | 0.007615 | 2.23787  | down | hsa_circ_0 | 0.006668 |
| 2.094484832 | down | hsa_circ_0027 | 0.000179 | 2.288131 | down | hsa_circ_0 | 0.000471 |
| 2.25347715  | down | hsa_circ_0005 | 0.002926 | 2.034491 | down | hsa_circ_0 | 0.001032 |
| 2.15260374  | down | hsa-circRNA6  | 0.000111 | 2.183358 | down | hsa_circ_0 | 0.000824 |
| 2.381715021 | down | hsa_circ_0070 | 0.002866 | 3.91477  | down | hsa_circ_0 | 0.020174 |
| 2.170742993 | down | hsa_circ_0053 | 8.77E-05 | 2.45218  | down | hsa_circ_0 | 0.000293 |
| 2.088763916 | down | hsa_circ_0053 | 0.000354 | 2.14374  | down | hsa_circ_0 | 9.59E-05 |
| 2.072440808 | down | hsa_circ_0092 | 0.00022  | 2.489284 | down | hsa-circRN | 0.000937 |
| 2.501907475 | down | hsa_circ_0124 | 0.008732 | 2.151898 | down | hsa-circRN | 0.000169 |
| 2.069529223 | down | hsa_circ_0054 | 0.005004 | 3.096787 | down | hsa_circ_0 | 0.001083 |
| 2.384967825 | down | hsa_circ_0020 | 4.68E-05 | 2.185489 | down | hsa-circRN | 0.005431 |
| 2.092048627 | down | hsa_circ_0127 | 3.44E-05 | 2.091093 | down | hsa-circRN | 0.002114 |
| 2.332260315 | down | hsa_circ_0006 | 0.002162 | 2.106243 | down | hsa_circ_0 | 6.65E-06 |
| 2.033517376 | down | hsa_circ_0071 | 8.41E-05 | 2.004096 | down | hsa-circRN | 0.0002   |
| 2.100006897 | down | hsa_circ_0132 | 0.000366 | 2.44027  | down | hsa_circ_0 | 0.000646 |
| 2.098579154 | down | hsa_circ_0021 | 3.49E-05 | 2.796106 | down | hsa-circRN | 2.41E-05 |
| 2.078751597 | down | hsa_circ_0006 | 0.000451 | 2.029763 | down | hsa_circ_0 | 0.000582 |
| 2.849124919 | down | hsa_circ_0071 | 1.8E-05  | 2.158687 | down | hsa-circRN | 0.005758 |
| 2.235205049 | down | hsa_circ_0132 | 0.000228 | 2.329886 | down | hsa-circRN | 0.007421 |
| 2.111414699 | down | hsa-circRNA7  | 0.010803 | 2.011456 | down | hsa_circ_0 | 0.000678 |
| 2.150927782 | down | hsa-circRNA2  | 5.69E-07 | 2.979964 | down | hsa_circ_0 | 8.51E-05 |
| 2.989550513 | down | hsa_circ_0016 | 0.012835 | 2.234695 | down | hsa-circRN | 4.52E-05 |
| 2.086558474 | down | hsa-circRNA2  | 9.74E-05 | 2.244014 | down | hsa_circ_0 | 0.002966 |
| 2.282132978 | down | hsa_circ_0102 | 0.000257 | 2.076531 | down | hsa-circRN | 0.00059  |
| 2.212925297 | down | hsa_circ_0117 | 0.000396 | 2.09909  | down | hsa_circ_0 | 1.49E-05 |
| 2.537040801 | down | hsa_circ_0105 | 0.001287 | 2.634517 | down | hsa_circ_0 | 0.000138 |
| 2.293196998 | down | hsa_circ_0028 | 0.000916 | 2.574093 | down | hsa-circRN | 7.77E-05 |
| 2.070015777 | down | hsa_circ_0077 | 0.001297 | 2.193336 | down | hsa_circ_0 | 0.008832 |
| 2.232536649 | down | hsa_circ_0087 | 0.000153 | 2.274121 | down | hsa_circ_0 | 0.000194 |
| 2.404837197 | down | hsa-circRNA6  | 0.00322  | 2.042735 | down | hsa-circRN | 0.001937 |
| 2.620674143 | down | hsa-circRNA1  | 0.000947 | 2.056045 | down | hsa_circ_0 | 0.001331 |
| 2.248029737 | down | hsa_circ_0038 | 9.1E-06  | 2.342483 | down | hsa-circRN | 1.29E-05 |
| 2.019757568 | down | hsa_circ_0122 | 0.000186 | 2.460832 | down | hsa-circRN | 0.000129 |
| 2.060015835 | down | hsa_circ_0091 | 0.013147 | 2.067165 | down | hsa_circ_0 | 0.000254 |
| 2.095096993 | down | hsa_circ_0110 | 0.000466 | 2.003623 | down | hsa_circ_0 | 0.000419 |
| 2.04795472  | down | hsa_circ_0095 | 1.91E-05 | 2.018328 | down | hsa-circRN | 9.15E-05 |
| 2.179605243 | down | hsa-circRNA9  | 0.001005 | 2.341274 | down | hsa_circ_0 | 3.4E-05  |
| 2.272830646 | down | hsa_circ_0064 | 0.000108 | 2.109735 | down | hsa_circ_0 | 0.000572 |
| 2.112335387 | down | hsa_circ_0072 | 0.000325 | 2.007416 | down | hsa_circ_0 | 0.038142 |
| 2.420313881 | down | hsa_circ_0140 | 4.45E-05 | 2.621491 | down | hsa-circRN | 0.013846 |
| 2.012889642 | down | hsa_circ_0093 | 0.00099  | 2.301798 | down | hsa-circRN | 1.41E-05 |
| 2.279565419 | down | hsa_circ_0135 | 0.000341 | 2.162226 | down | hsa_circ_0 | 0.000168 |
| 2.171577634 | down | hsa_circ_0035 | 0.000683 | 2.453544 | down | hsa-circRN | 0.000171 |
| 2.41653445  | down | hsa_circ_0023 | 7E-06    | 2.360354 | down | hsa_circ_0 | 0.000109 |
| 2.099891957 | down | hsa_circ_0110 | 6.73E-05 | 2.029557 | down | hsa_circ_0 | 2.77E-05 |
| 2.131486969 | down | hsa_circ_0121 | 0.005762 | 2.01997  | down | hsa-circRN | 0.000636 |
| 3.810693406 | down | hsa_circ_0065 | 0.00067  | 2.104528 | down | hsa_circ_0 | 0.005211 |

|             |      |               |          |          |      |            |          |
|-------------|------|---------------|----------|----------|------|------------|----------|
| 2.866966634 | down | hsa_circ_0073 | 0.000229 | 2.187421 | down | hsa_circ_0 | 0.013358 |
| 2.05171716  | down | hsa_circ_0105 | 0.010175 | 2.248102 | down | hsa-circRN | 0.000136 |
| 2.016895453 | down | hsa_circ_0054 | 1.78E-05 | 2.076331 | down | hsa_circ_0 | 0.005403 |
| 2.080107961 | down | hsa_circ_0132 | 1.46E-05 | 2.506747 | down | hsa_circ_0 | 0.001983 |
| 2.042530516 | down | hsa-circRNA1  | 0.005479 | 2.007126 | down | hsa_circ_0 | 0.00057  |
| 2.050496774 | down | hsa_circ_0025 | 0.004564 | 2.029801 | down | hsa_circ_0 | 0.000443 |
| 2.184922096 | down | hsa-circRNA1  | 4.27E-05 | 2.673673 | down | hsa_circ_0 | 0.000159 |
| 2.081901007 | down | hsa_circ_0135 | 7.05E-05 | 2.035123 | down | hsa_circ_0 | 0.003838 |
| 2.065693017 | down | hsa_circ_0053 | 7.44E-06 | 2.095264 | down | hsa_circ_0 | 0.00208  |
| 3.005908204 | down | hsa_circ_0125 | 0.000417 | 2.996844 | down | hsa_circ_0 | 8.11E-05 |
| 2.111250301 | down | hsa_circ_0081 | 0.044018 | 2.122817 | down | hsa_circ_0 | 0.000202 |
| 2.037937182 | down | hsa_circ_0008 | 0.0005   | 2.078102 | down | hsa-circRN | 0.002799 |
| 2.114247659 | down | hsa-circRNA6  | 0.015843 | 2.057803 | down | hsa-circRN | 0.013046 |
| 2.307664638 | down | hsa-circRNA1  | 4.36E-05 | 2.27687  | down | hsa_circ_0 | 6.51E-05 |
| 2.537799451 | down | hsa_circ_0094 | 4.5E-05  | 3.150129 | down | hsa_circ_0 | 0.014207 |
| 2.130719569 | down | hsa_circ_0113 | 1.41E-05 | 2.050233 | down | hsa_circ_0 | 0.000316 |
| 2.178782433 | down | hsa_circ_0017 | 0.000128 | 2.088107 | down | hsa-circRN | 0.009837 |
| 2.0269499   | down | hsa-circRNA1  | 0.000314 | 2.1942   | down | hsa_circ_0 | 0.000189 |
| 3.551008443 | down | hsa-circRNA3  | 0.000174 | 2.137497 | down | hsa_circ_0 | 0.000113 |
| 2.050735901 | down | hsa_circ_0095 | 0.029058 | 2.166515 | down | hsa_circ_0 | 2.18E-05 |
| 2.198787236 | down | hsa_circ_0035 | 6.72E-05 | 2.232913 | down | hsa_circ_0 | 0.000259 |
| 2.593127396 | down | hsa_circ_0136 | 1.97E-05 | 2.094899 | down | hsa_circ_0 | 0.003985 |
| 2.072661142 | down | hsa-circRNA1  | 0.000934 | 2.112508 | down | hsa_circ_0 | 5.2E-05  |
| 2.739637046 | down | hsa_circ_0025 | 0.010728 | 2.020054 | down | hsa_circ_0 | 0.011516 |
| 2.053814733 | down | hsa_circ_0031 | 0.00156  | 2.244883 | down | hsa-circRN | 0.00062  |
| 2.154710128 | down | hsa_circ_0056 | 6.37E-05 | 2.213799 | down | hsa_circ_0 | 0.00115  |
| 2.01942286  | down | hsa_circ_0072 | 0.000165 | 2.12843  | down | hsa_circ_0 | 0.001677 |
| 2.084351139 | down | hsa_circ_0126 | 2.86E-06 | 2.413006 | down | hsa_circ_0 | 1.39E-05 |
| 2.008439541 | down | hsa-circRNA1  | 0.000797 | 2.111007 | down | hsa-circRN | 0.000127 |
| 2.10857764  | down | hsa_circ_0130 | 0.000774 | 2.185024 | down | hsa_circ_0 | 7.33E-05 |
| 2.417335969 | down | hsa-circRNA1  | 0.003997 | 2.163635 | down | hsa_circ_0 | 4.61E-05 |
| 2.18711265  | down | hsa_circ_0102 | 0.001275 | 2.314706 | down | hsa-circRN | 0.000334 |
| 2.001665256 | down | hsa_circ_0111 | 0.005786 | 2.001504 | down | hsa_circ_0 | 0.013875 |
| 2.33217209  | down | hsa_circ_0053 | 0.000435 | 2.082373 | down | hsa_circ_0 | 1.06E-05 |
| 2.133209706 | down | hsa-circRNA1  | 6.03E-05 | 2.112173 | down | hsa_circ_0 | 5.1E-05  |
| 2.166494175 | down | hsa_circ_0020 | 0.000156 | 2.427172 | down | hsa_circ_0 | 1.54E-05 |
| 2.200529463 | down | hsa-circRNA1  | 0.000497 | 2.207428 | down | hsa_circ_0 | 1.06E-05 |
| 2.035383328 | down | hsa_circ_0088 | 0.000215 | 2.041435 | down | hsa_circ_0 | 0.000213 |
| 2.11840193  | down | hsa_circ_0035 | 0.000392 | 2.022385 | down | hsa_circ_0 | 0.004935 |
| 2.02522445  | down | hsa-circRNA1  | 0.015208 | 2.010472 | down | hsa_circ_0 | 3.28E-06 |
| 2.412145885 | down | hsa-circRNA5  | 0.000655 | 2.106698 | down | hsa_circ_0 | 0.000203 |
| 2.132112527 | down | hsa_circ_0027 | 0.000801 | 2.341658 | down | hsa-circRN | 0.001793 |
| 2.05995832  | down | hsa_circ_0071 | 5.69E-05 | 2.199458 | down | hsa_circ_0 | 0.00046  |
| 2.176947758 | down | hsa_circ_0115 | 8.32E-05 | 2.099835 | down | hsa_circ_0 | 8.1E-05  |
| 2.474938184 | down | hsa-circRNA6  | 0.00174  | 2.286723 | down | hsa-circRN | 0.000859 |
| 2.259971093 | down | hsa_circ_0127 | 0.001215 | 2.146929 | down | hsa_circ_0 | 0.00026  |
| 2.089887594 | down | hsa_circ_0042 | 0.000326 | 2.567331 | down | hsa_circ_0 | 0.002058 |
| 2.105175327 | down | hsa_circ_0126 | 0.002508 | 2.01293  | down | hsa_circ_0 | 0.000101 |
| 2.307730557 | down | hsa_circ_0114 | 0.003405 | 2.19479  | down | hsa_circ_0 | 1.68E-05 |
| 2.197990702 | down | hsa_circ_0027 | 0.00263  | 2.246771 | down | hsa_circ_0 | 0.002631 |



|             |      |               |          |          |      |            |          |
|-------------|------|---------------|----------|----------|------|------------|----------|
| 2.071456977 | down | hsa_circ_0087 | 0.000397 | 2.491186 | down | hsa_circ_0 | 0.016141 |
| 2.089235812 | down | hsa_circ_0117 | 4.73E-05 | 2.756622 | down | hsa_circ_0 | 5.91E-05 |
| 2.360383982 | down | hsa-circRNA1  | 9.88E-05 | 2.084468 | down | hsa-circRN | 0.000132 |
| 2.238304292 | down | hsa_circ_0120 | 0.00014  | 2.0402   | down | hsa_circ_0 | 3.78E-05 |
| 2.218147817 | down | hsa-circRNA7  | 0.001129 | 2.025274 | down | hsa_circ_0 | 8.26E-05 |
| 2.433741708 | down | hsa_circ_0120 | 0.005902 | 2.749379 | down | hsa_circ_0 | 0.000171 |
| 2.030028282 | down | hsa_circ_0091 | 0.000117 | 2.218685 | down | hsa_circ_0 | 0.002458 |
| 2.421072774 | down | hsa_circ_0053 | 0.000133 | 2.525174 | down | hsa-circRN | 0.000373 |
| 2.052082825 | down | hsa-circRNA2  | 7.87E-06 | 2.039374 | down | hsa_circ_0 | 0.001515 |
| 2.302853747 | down | hsa_circ_0136 | 0.000592 | 2.034958 | down | hsa-circRN | 0.000998 |
| 2.020301124 | down | hsa-circRNA1  | 0.000218 | 2.165227 | down | hsa-circRN | 0.010698 |
| 2.066312085 | down | hsa_circ_0090 | 0.000153 | 2.049276 | down | hsa_circ_0 | 0.003879 |
| 2.39672384  | down | hsa-circRNA8  | 1.6E-05  | 2.288327 | down | hsa_circ_0 | 0.000267 |
| 2.183132326 | down | hsa_circ_0077 | 0.000111 | 2.469188 | down | hsa_circ_0 | 0.023939 |
| 2.116132324 | down | hsa_circ_0001 | 0.000932 | 2.078597 | down | hsa_circ_0 | 2.14E-05 |
| 2.10778382  | down | hsa_circ_0027 | 0.000775 | 2.637088 | down | hsa_circ_0 | 6.82E-05 |
| 2.326213799 | down | hsa_circ_0083 | 5.11E-05 | 2.179454 | down | hsa-circRN | 7.81E-05 |
| 2.070021401 | down | hsa_circ_0075 | 0.001195 | 2.087645 | down | hsa-circRN | 7.5E-05  |
| 2.373312466 | down | hsa_circ_0025 | 0.000246 | 2.653697 | down | hsa_circ_0 | 0.002908 |
| 2.035085776 | down | hsa-circRNA7  | 0.018618 | 2.328742 | down | hsa_circ_0 | 1.16E-05 |
| 2.264546703 | down | hsa_circ_0053 | 0.002182 | 2.049229 | down | hsa_circ_0 | 5.86E-05 |
| 2.578462325 | down | hsa_circ_0025 | 0.007394 | 2.222541 | down | hsa-circRN | 0.006114 |
| 2.287940502 | down | hsa-circRNA1  | 0.002084 | 2.104753 | down | hsa_circ_0 | 0.003905 |
| 2.081365928 | down | hsa-circRNA1  | 0.007731 | 2.321734 | down | hsa_circ_0 | 0.000358 |
| 2.278389655 | down | hsa-circRNA3  | 6.35E-06 | 2.229181 | down | hsa_circ_0 | 0.000115 |
| 2.037467985 | down | hsa_circ_0081 | 0.00293  | 2.01447  | down | hsa_circ_0 | 0.000564 |
| 2.375768897 | down | hsa_circ_0108 | 0.036058 | 2.61981  | down | hsa_circ_0 | 0.000599 |
| 3.232892469 | down | hsa_circ_0004 | 0.003709 | 2.257714 | down | hsa_circ_0 | 0.013881 |
| 2.175516293 | down | hsa-circRNA5  | 8.51E-05 | 2.570535 | down | hsa_circ_0 | 2.43E-05 |
| 2.11421572  | down | hsa_circ_0023 | 1.75E-05 | 2.492776 | down | hsa_circ_0 | 0.000268 |
| 2.343358742 | down | hsa_circ_0054 | 0.000562 | 2.133374 | down | hsa_circ_0 | 9.22E-05 |
| 2.110274095 | down | hsa_circ_0092 | 0.04384  | 2.226338 | down | hsa_circ_0 | 8.8E-05  |
| 2.445351438 | down | hsa_circ_0060 | 0.010136 | 2.171253 | down | hsa_circ_0 | 0.000174 |
| 2.001406646 | down | hsa_circ_0121 | 0.001272 | 2.078115 | down | hsa_circ_0 | 0.000234 |
| 2.082799946 | down | hsa_circ_0067 | 0.000281 | 2.178572 | down | hsa-circRN | 0.000243 |
| 2.463417375 | down | hsa_circ_0031 | 6.64E-05 | 2.703176 | down | hsa_circ_0 | 0.027945 |
| 2.078349043 | down | hsa_circ_0007 | 0.001603 | 2.484025 | down | hsa_circ_0 | 0.019892 |
| 2.152968919 | down | hsa_circ_0126 | 8.92E-05 | 2.001546 | down | hsa_circ_0 | 1.62E-05 |
| 2.573662326 | down | hsa-circRNA7  | 0.011526 | 2.594165 | down | hsa_circ_0 | 0.000163 |
| 2.332271935 | down | hsa-circRNA1  | 0.012355 | 2.099808 | down | hsa_circ_0 | 0.00313  |
| 2.141837678 | down | hsa_circ_0095 | 0.008513 | 2.051217 | down | hsa_circ_0 | 0.000259 |
| 2.109095187 | down | hsa-circRNA6  | 0.00052  | 2.671576 | down | hsa_circ_0 | 6.06E-05 |
| 2.033396928 | down | hsa_circ_0094 | 3.85E-05 | 2.21084  | down | hsa-circRN | 0.000577 |
| 2.041926147 | down | hsa_circ_0097 | 0.00234  | 2.018772 | down | hsa_circ_0 | 0.014971 |
| 2.01550612  | down | hsa_circ_0057 | 0.02728  | 2.091325 | down | hsa_circ_0 | 4.17E-05 |
| 2.179309799 | down | hsa_circ_0028 | 0.000191 | 2.541256 | down | hsa_circ_0 | 0.001269 |
| 2.188368736 | down | hsa_circ_0120 | 0.000706 | 2.01614  | down | hsa_circ_0 | 7.31E-06 |
| 2.249904947 | down | hsa_circ_0134 | 0.001245 | 2.151117 | down | hsa_circ_0 | 0.000694 |
| 2.756159754 | down | hsa_circ_0115 | 0.003518 | 2.176608 | down | hsa_circ_0 | 0.000185 |
| 2.219244306 | down | hsa_circ_0127 | 0.001605 | 2.129916 | down | hsa-circRN | 0.019351 |

|             |      |               |          |          |      |               |          |
|-------------|------|---------------|----------|----------|------|---------------|----------|
| 2.019320881 | down | hsa_circ_0102 | 0.000515 | 2.461366 | down | hsa_circ_0102 | 3.83E-07 |
| 2.500377067 | down | hsa_circ_0035 | 0.000325 | 2.086581 | down | hsa_circ_0035 | 0.000612 |
| 2.354972614 | down | hsa_circ_0117 | 0.004725 | 2.027332 | down | hsa_circ_0117 | 0.00084  |
| 2.105038982 | down | hsa_circ_0001 | 0.000141 | 2.450596 | down | hsa_circ_0001 | 0.012724 |
| 2.178081988 | down | hsa_circ_0084 | 0.000152 | 2.033125 | down | hsa_circ_0084 | 0.002029 |
| 2.069447045 | down | hsa_circRNA9  | 3.2E-05  | 2.026201 | down | hsa_circ_0084 | 0.002027 |
| 2.097936613 | down | hsa_circRNA6  | 0.000622 | 2.070851 | down | hsa_circ_0084 | 0.001551 |
| 2.005623771 | down | hsa_circ_0095 | 0.026283 | 2.032329 | down | hsa_circ_0095 | 4.02E-05 |
| 2.489132969 | down | hsa_circ_0025 | 1.32E-05 | 2.739595 | down | hsa_circ_0025 | 1.19E-05 |
| 2.032729912 | down | hsa_circ_0091 | 0.004771 | 2.061149 | down | hsa_circ_0091 | 0.001304 |
| 2.067994472 | down | hsa_circ_0134 | 0.003497 | 2.054835 | down | hsa_circ_0134 | 5.7E-06  |
| 2.275082226 | down | hsa_circ_0054 | 0.000342 | 2.12401  | down | hsa_circ_0054 | 0.001446 |
| 2.956723618 | down | hsa_circ_0112 | 0.001783 | 2.048046 | down | hsa_circ_0112 | 0.000581 |
| 2.610982141 | down | hsa_circ_0123 | 0.000113 | 2.24734  | down | hsa_circ_0123 | 0.00675  |
| 2.058715583 | down | hsa_circ_0004 | 0.000284 | 2.194059 | down | hsa_circ_0004 | 0.000185 |
| 2.177116705 | down | hsa_circ_0031 | 0.008183 | 2.010222 | down | hsa_circ_0031 | 0.000101 |
| 2.149949744 | down | hsa_circ_0115 | 0.001065 | 2.38835  | down | hsa_circ_0115 | 2.85E-05 |
| 2.014550502 | down | hsa_circ_0001 | 0.00149  | 2.033701 | down | hsa_circ_0001 | 0.001142 |
| 2.091592585 | down | hsa_circ_0122 | 0.001267 | 2.0555   | down | hsa_circ_0122 | 0.003258 |
| 2.067853081 | down | hsa_circ_0132 | 0.00025  | 2.029568 | down | hsa_circ_0132 | 0.000707 |
| 2.271521203 | down | hsa_circRNA4  | 0.000234 | 2.04955  | down | hsa_circ_0132 | 8.96E-05 |
| 2.11337856  | down | hsa_circ_0067 | 0.000995 | 2.065983 | down | hsa_circ_0067 | 1.94E-06 |
| 2.01005154  | down | hsa_circ_0115 | 0.001117 | 2.177779 | down | hsa_circ_0115 | 0.000135 |
| 2.435963065 | down | hsa_circRNA7  | 0.00097  | 2.474076 | down | hsa_circ_0115 | 0.000678 |
| 2.269928909 | down | hsa_circ_0005 | 7.36E-05 | 2.132392 | down | hsa_circ_0005 | 0.004519 |
| 2.326603195 | down | hsa_circ_0083 | 0.00032  | 2.049389 | down | hsa_circ_0083 | 8.3E-06  |
| 2.767000179 | down | hsa_circRNA1  | 0.000432 | 2.059231 | down | hsa_circ_0083 | 5.92E-05 |
| 2.118409945 | down | hsa_circRNA1  | 0.000224 | 2.048392 | down | hsa_circ_0083 | 4.82E-05 |
| 2.370809512 | down | hsa_circ_0105 | 0.000275 | 2.143126 | down | hsa_circ_0105 | 0.000313 |
| 2.072185273 | down | hsa_circ_0054 | 4.46E-05 | 2.190827 | down | hsa_circ_0054 | 0.001631 |
| 2.144338128 | down | hsa_circRNA1  | 0.004281 | 2.080329 | down | hsa_circ_0054 | 0.011397 |
| 2.168507449 | down | hsa_circ_0078 | 7.67E-05 | 2.379233 | down | hsa_circ_0078 | 8.53E-05 |
| 2.21518206  | down | hsa_circ_0001 | 0.002309 | 2.155605 | down | hsa_circ_0001 | 0.000413 |
| 2.345014305 | down | hsa_circ_0104 | 0.003386 | 2.099627 | down | hsa_circ_0104 | 0.00018  |
| 2.352353698 | down | hsa_circ_0071 | 3.64E-05 | 2.22224  | down | hsa_circ_0071 | 0.004521 |
| 2.285675286 | down | hsa_circ_0038 | 0.000104 | 2.093132 | down | hsa_circ_0038 | 9.97E-05 |
| 2.095889919 | down | hsa_circ_0104 | 5.77E-05 | 2.272358 | down | hsa_circ_0104 | 0.000103 |
| 2.194083819 | down | hsa_circ_0136 | 0.047399 | 2.000287 | down | hsa_circ_0136 | 9.59E-06 |
| 2.102692372 | down | hsa_circ_0015 | 9.11E-05 | 2.017144 | down | hsa_circ_0015 | 0.021143 |
| 2.253938363 | down | hsa_circ_0070 | 0.035727 | 2.085803 | down | hsa_circ_0070 | 2.8E-05  |
| 2.141811246 | down | hsa_circRNA1  | 0.000122 | 2.063213 | down | hsa_circ_0070 | 4.79E-05 |
| 2.352326096 | down | hsa_circ_0002 | 3.87E-05 | 2.011426 | down | hsa_circ_0002 | 0.000851 |
| 2.282222381 | down | hsa_circ_0044 | 0.001018 | 2.286911 | down | hsa_circ_0044 | 0.004327 |
| 2.077198351 | down | hsa_circ_0047 | 0.000338 | 3.577849 | down | hsa_circ_0047 | 0.000227 |
| 2.03720019  | down | hsa_circ_0098 | 0.000213 | 2.322834 | down | hsa_circ_0098 | 6.14E-05 |
| 2.823790251 | down | hsa_circ_0012 | 0.000163 | 2.473486 | down | hsa_circ_0012 | 4.63E-05 |
| 2.029065392 | down | hsa_circ_0070 | 0.001204 | 2.124935 | down | hsa_circ_0070 | 9.48E-06 |
| 2.260305922 | down | hsa_circ_0101 | 0.003312 | 2.682613 | down | hsa_circ_0101 | 0.000422 |
| 2.001151313 | down | hsa_circ_0106 | 0.000496 | 2.056431 | down | hsa_circ_0106 | 0.001934 |
| 2.176081314 | down | hsa_circ_0093 | 0.000146 | 2.537982 | down | hsa_circ_0093 | 0.000295 |

|             |      |               |          |          |      |            |          |
|-------------|------|---------------|----------|----------|------|------------|----------|
| 2.091356624 | down | hsa_circ_0032 | 0.000713 | 2.062898 | down | hsa-circRN | 0.000631 |
| 2.087510991 | down | hsa_circ_0020 | 0.000751 | 2.021399 | down | hsa_circ_0 | 0.001532 |
| 2.14910751  | down | hsa_circ_0011 | 0.004192 | 2.02343  | down | hsa_circ_0 | 0.014393 |
| 2.080312994 | down | hsa_circ_0057 | 0.000585 | 2.146804 | down | hsa_circ_0 | 0.000362 |
| 2.068104507 | down | hsa_circ_0104 | 0.000864 | 2.083944 | down | hsa_circ_0 | 0.000332 |
| 2.167593617 | down | hsa_circ_0013 | 0.003097 | 2.014817 | down | hsa_circ_0 | 0.002925 |
| 2.001234468 | down | hsa_circ_0053 | 4.17E-05 | 2.000784 | down | hsa_circ_0 | 8.98E-05 |
| 2.036442993 | down | hsa_circ_0072 | 0.001773 | 2.32258  | down | hsa_circ_0 | 0.002736 |
| 2.115159147 | down | hsa_circ_0024 | 3.2E-05  | 2.794589 | down | hsa_circ_0 | 8.26E-05 |
| 2.176176523 | down | hsa_circ_0132 | 0.000182 | 2.08609  | down | hsa_circ_0 | 5.22E-05 |
| 2.394997805 | down | hsa-circRNA1  | 8.36E-05 | 2.252019 | down | hsa_circ_0 | 0.001381 |
| 2.00326405  | down | hsa_circ_0133 | 0.00131  | 2.187109 | down | hsa_circ_0 | 0.006472 |
| 2.247627777 | down | hsa_circ_0084 | 0.000825 | 2.226274 | down | hsa_circ_0 | 4.58E-05 |
| 2.134951609 | down | hsa_circ_0071 | 0.001468 | 2.147539 | down | hsa_circ_0 | 0.000176 |
| 2.131271345 | down | hsa_circ_0038 | 3.27E-06 | 2.633899 | down | hsa_circ_0 | 0.001669 |
| 2.47047967  | down | hsa-circRNA1  | 1.66E-05 | 2.120936 | down | hsa-circRN | 0.024031 |
| 2.110312179 | down | hsa_circ_0071 | 0.007682 | 2.564997 | down | hsa_circ_0 | 0.000199 |
| 2.025308689 | down | hsa_circ_0072 | 1.07E-05 | 2.12899  | down | hsa_circ_0 | 8.73E-05 |
| 2.023996463 | down | hsa_circ_0047 | 0.000667 | 2.009573 | down | hsa_circ_0 | 0.000944 |
| 2.350601527 | down | hsa_circ_0058 | 0.000431 | 2.109734 | down | hsa-circRN | 0.001127 |
| 2.035627629 | down | hsa_circ_0070 | 0.001193 | 2.250566 | down | hsa_circ_0 | 5.15E-05 |
| 2.221868852 | down | hsa_circ_0091 | 0.001097 | 2.207046 | down | hsa-circRN | 1.87E-05 |
| 2.264160605 | down | hsa_circ_0127 | 8.42E-06 | 2.224937 | down | hsa_circ_0 | 0.000615 |
| 2.003046817 | down | hsa_circ_0073 | 0.000492 | 2.14622  | down | hsa_circ_0 | 0.000376 |
| 2.408604527 | down | hsa_circ_0134 | 0.002011 | 2.260242 | down | hsa_circ_0 | 0.039572 |
| 2.121860683 | down | hsa_circ_0071 | 2.77E-05 | 2.051458 | down | hsa_circ_0 | 0.002765 |
| 2.23999926  | down | hsa_circ_0077 | 0.000349 | 2.442238 | down | hsa-circRN | 0.000189 |
| 2.007809903 | down | hsa_circ_0105 | 1.66E-06 | 2.319646 | down | hsa_circ_0 | 0.00054  |
| 2.083974312 | down | hsa_circ_0125 | 0.004799 | 2.072636 | down | hsa_circ_0 | 1.1E-05  |
| 2.096390893 | down | hsa_circ_0084 | 0.000298 | 2.021904 | down | hsa_circ_0 | 3.37E-05 |
| 2.150716245 | down | hsa_circ_0135 | 0.002656 | 2.037895 | down | hsa_circ_0 | 0.000752 |
| 2.051312    | down | hsa_circ_0095 | 0.000116 | 2.762512 | down | hsa-circRN | 0.00067  |
| 2.324221522 | down | hsa-circRNA9  | 0.002382 | 2.00874  | down | hsa_circ_0 | 0.005824 |
| 2.054308081 | down | hsa-circRNA5  | 6.95E-05 | 2.312924 | down | hsa-circRN | 0.000172 |
| 2.186908224 | down | hsa_circ_0098 | 1.94E-05 | 2.456006 | down | hsa-circRN | 0.000499 |
| 2.197710631 | down | hsa_circ_0115 | 1.69E-05 | 2.488705 | down | hsa-circRN | 0.000141 |
| 2.007637591 | down | hsa_circ_0125 | 0.009613 | 2.094115 | down | hsa_circ_0 | 0.000273 |
| 2.107208583 | down | hsa_circ_0023 | 0.000403 | 2.103311 | down | hsa_circ_0 | 0.000453 |
| 2.281816513 | down | hsa_circ_0036 | 0.002618 | 2.04929  | down | hsa_circ_0 | 5.63E-05 |
| 2.168081218 | down | hsa-circRNA2  | 3.57E-06 | 2.208544 | down | hsa_circ_0 | 0.000183 |
| 2.038867864 | down | hsa_circ_0126 | 0.001443 | 2.586805 | down | hsa_circ_0 | 0.004844 |
| 2.064854592 | down | hsa_circ_0008 | 0.000273 | 2.242549 | down | hsa_circ_0 | 9.56E-06 |
| 2.225496842 | down | hsa_circ_0094 | 0.001478 | 3.098221 | down | hsa_circ_0 | 4.04E-05 |
| 2.513340677 | down | hsa_circ_0064 | 1.16E-05 | 2.034211 | down | hsa-circRN | 0.00014  |
| 2.099385908 | down | hsa_circ_0084 | 0.00118  | 2.033546 | down | hsa_circ_0 | 0.000143 |
| 2.277400073 | down | hsa_circ_0135 | 0.000527 | 2.490171 | down | hsa_circ_0 | 0.000107 |
| 2.035893031 | down | hsa_circ_0120 | 0.00059  | 2.108801 | down | hsa_circ_0 | 0.000233 |
| 2.178648978 | down | hsa_circ_0102 | 0.003937 | 2.025346 | down | hsa-circRN | 2.72E-06 |
| 2.050661382 | down | hsa_circ_0016 | 0.000223 | 2.106027 | down | hsa_circ_0 | 3.13E-05 |
| 2.677707355 | down | hsa_circ_0060 | 0.009088 | 2.305689 | down | hsa_circ_0 | 0.000376 |

|             |      |               |          |          |      |            |          |
|-------------|------|---------------|----------|----------|------|------------|----------|
| 2.009156135 | down | hsa_circ_0117 | 0.005513 | 2.717618 | down | hsa_circ_0 | 0.000246 |
| 2.089913909 | down | hsa_circ_0023 | 0.000288 | 2.018035 | down | hsa-circRN | 0.000127 |
| 2.371782756 | down | hsa-circRNA6  | 0.000896 | 2.057857 | down | hsa_circ_0 | 9.18E-05 |
| 2.062691743 | down | hsa_circ_0123 | 0.000226 | 2.20771  | down | hsa-circRN | 0.00414  |
| 2.19302118  | down | hsa_circ_0023 | 1.52E-05 | 2.729042 | down |            |          |
| 2.02189111  | down | hsa-circRNA1  | 0.000235 | 2.483752 | down |            |          |

For Peer Review



**Fold changeExpression**

2.090577 down  
2.093147 down  
2.111401 down  
2.07041 down  
2.044137 down  
2.124609 down  
2.436786 down  
2.527384 down  
2.220837 down  
2.543035 down  
2.175037 down  
2.270757 down  
2.096874 down  
2.36229 down  
2.267042 down  
2.195922 down  
2.456072 down  
2.108012 down  
2.349827 down  
2.150149 down  
2.143758 down  
2.124634 down  
2.046827 down  
3.229086 down  
2.147714 down  
2.149033 down  
2.342767 down  
2.069617 down  
2.174944 down  
2.060684 down  
2.067672 down  
2.089312 down  
5.274905 down  
2.122379 down  
2.021067 down  
4.124689 down  
2.821988 down  
2.174269 down  
2.000929 down  
2.969757 down  
2.19987 down  
2.644883 down  
2.529119 down  
2.402218 down  
2.085983 down  
2.041597 down  
2.819525 down  
2.179433 down

2.132599 down  
2.089639 down  
2.615996 down  
2.236913 down  
2.545672 down  
2.366313 down  
2.03638 down  
2.090681 down  
2.227614 down  
2.083277 down  
2.10736 down  
2.070125 down  
2.152854 down  
2.11956 down  
2.179487 down  
2.08411 down  
2.121617 down  
2.187692 down  
2.255451 down  
2.703585 down  
2.020535 down  
2.169696 down  
2.300905 down  
2.257126 down  
2.006922 down  
2.211409 down  
2.267908 down  
2.04429 down  
2.069248 down  
2.211696 down  
2.021865 down  
3.057265 down  
2.049969 down  
2.21981 down  
2.415285 down  
2.110871 down  
2.069418 down  
2.125901 down  
2.040874 down  
2.116934 down  
2.33376 down  
2.052524 down  
2.373838 down  
2.183902 down  
2.027306 down  
2.106114 down  
2.129584 down  
2.224649 down  
2.271798 down  
2.329044 down

For Peer Review

2.417563 down  
2.247496 down  
2.168574 down  
2.814194 down  
2.14594 down  
2.031463 down  
2.004743 down  
2.205249 down  
2.088483 down  
2.158484 down  
2.144688 down  
2.099566 down  
2.327207 down  
2.083767 down  
2.160092 down  
2.199458 down  
2.240984 down  
2.061988 down  
2.003475 down  
2.079738 down  
2.248744 down  
2.078982 down  
2.451334 down  
2.253526 down  
2.239514 down  
2.218976 down  
2.264071 down  
2.223162 down  
2.064809 down  
2.054965 down  
2.674167 down  
2.205603 down  
2.084735 down  
2.217432 down  
2.120728 down  
2.00771 down  
2.159221 down  
2.093792 down  
2.148405 down  
2.183512 down  
2.059316 down  
2.407848 down  
2.089918 down  
2.076965 down  
2.046192 down  
2.032415 down  
2.242792 down  
2.432098 down  
2.786048 down  
2.301453 down

For Peer Review

2.324734 down  
2.143101 down  
2.021892 down  
2.532652 down  
2.442127 down  
2.532115 down  
2.524953 down  
2.236437 down  
2.01705 down  
3.544025 down  
2.350271 down  
2.279587 down  
2.233734 down  
2.022158 down  
2.132346 down  
2.363989 down  
2.335767 down  
2.049807 down  
2.354812 down  
2.033461 down  
2.187404 down  
2.001432 down  
2.743341 down  
2.007288 down  
2.087692 down  
2.29187 down  
2.001273 down  
4.144739 down  
2.108139 down  
2.134578 down  
2.018618 down  
2.104412 down  
2.434134 down  
3.050572 down  
2.248337 down  
2.649059 down  
2.455204 down  
2.725545 down  
2.05584 down  
2.222435 down  
2.10059 down  
2.297103 down  
2.584469 down  
2.05393 down  
2.205791 down  
2.201308 down  
2.007433 down  
2.14438 down  
2.070568 down  
2.184482 down

For Peer Review

2.071431 down  
2.215659 down  
2.249585 down  
2.13516 down  
2.298777 down  
2.137521 down  
2.343784 down  
2.371265 down  
2.261242 down  
2.105386 down  
2.245391 down  
2.352301 down  
2.274217 down  
2.375786 down  
2.00203 down  
2.012745 down  
2.034831 down  
2.113138 down  
2.29619 down  
2.657091 down  
2.077166 down  
2.116911 down  
2.711001 down  
2.065824 down  
2.157644 down  
2.266576 down  
2.212366 down  
2.002882 down  
2.085762 down  
2.07393 down  
2.115291 down  
2.020408 down  
2.236631 down  
2.031539 down  
2.031324 down  
2.183434 down  
2.106527 down  
2.09514 down  
2.285707 down  
2.124009 down  
2.468896 down  
2.58359 down  
2.082406 down  
2.005819 down  
2.548059 down  
2.103103 down  
2.088737 down  
2.163501 down  
2.346154 down  
2.013803 down

For Peer Review



2.218786 down  
2.266817 down  
2.197843 down  
2.080243 down  
2.260155 down  
2.39282 down  
2.001785 down  
2.95695 down  
2.171777 down  
2.489364 down  
2.005363 down  
2.899749 down  
2.048924 down  
2.345862 down  
2.19525 down  
2.020704 down  
2.05127 down  
2.412065 down  
2.056442 down  
2.17242 down  
2.053388 down  
2.297925 down  
2.144893 down  
2.021146 down  
2.083756 down  
2.052059 down  
2.044374 down  
2.467626 down  
3.295435 down  
2.054686 down  
2.201911 down  
2.091767 down  
2.049722 down  
2.129792 down  
2.154156 down  
2.214352 down  
2.272969 down  
2.38626 down  
2.469694 down  
2.149149 down  
2.266146 down  
2.417225 down  
2.112726 down  
2.117674 down  
2.153387 down  
2.034552 down  
2.343006 down  
2.0745 down  
2.216994 down  
2.031611 down

For Peer Review

2.003012 down  
2.243843 down  
2.027829 down  
2.36817 down  
2.732732 down  
2.103852 down  
2.093086 down  
2.228004 down  
2.543992 down  
2.397307 down  
2.414511 down  
2.376501 down  
2.173226 down  
2.007923 down  
2.37069 down  
2.258334 down  
2.220201 down  
2.458802 down  
2.888137 down  
2.044089 down  
2.103492 down  
2.030613 down  
2.037328 down  
2.003063 down  
2.175507 down  
2.242923 down  
2.11579 down  
2.759638 down  
2.440399 down  
2.242558 down  
2.005992 down  
2.188445 down  
2.372024 down  
2.002829 down  
2.326767 down  
2.299035 down  
2.489432 down  
2.333299 down  
3.047135 down  
2.765892 down  
2.355915 down  
2.0529 down  
2.486656 down  
2.133939 down  
2.176203 down  
2.082843 down  
2.62227 down  
2.859894 down  
2.331897 down  
2.407402 down

2.090123 down  
2.120929 down  
2.019806 down  
2.115788 down  
2.134202 down  
2.448118 down  
2.477651 down  
2.167667 down  
2.083278 down  
2.239196 down  
2.110547 down  
2.245513 down  
2.335986 down  
2.245314 down  
2.306871 down  
2.082298 down  
2.225687 down  
2.278961 down  
2.235878 down  
2.568739 down  
3.256494 down  
2.241442 down  
2.230189 down  
2.009612 down  
2.093826 down  
2.14954 down  
2.020031 down  
2.06442 down  
2.499984 down  
2.142749 down  
2.049762 down  
2.046008 down  
2.132937 down  
2.062454 down  
2.895813 down  
2.734735 down  
2.077279 down  
2.299905 down  
3.225443 down  
2.02056 down  
2.011674 down  
2.073163 down  
2.202468 down  
2.1906 down  
2.055445 down  
2.239807 down  
2.408149 down  
2.285486 down  
2.25115 down  
2.043565 down

For Peer Review

2.09801 down  
2.314183 down  
2.110748 down  
2.342442 down  
2.196411 down  
2.371849 down  
2.142046 down  
2.528557 down  
2.065468 down  
2.053562 down  
2.096687 down  
2.707851 down  
2.015727 down  
2.036656 down  
3.062952 down  
2.008618 down  
2.216639 down  
2.056737 down  
2.128304 down  
2.186069 down  
2.344991 down  
2.457988 down  
2.07775 down  
2.548418 down  
2.116324 down  
2.037004 down  
2.00947 down  
2.077532 down  
2.821824 down  
2.207911 down  
2.221455 down  
2.053199 down  
2.452441 down  
2.262385 down  
2.028352 down  
2.070364 down  
2.325269 down  
2.492144 down  
2.012087 down  
2.329222 down  
2.040257 down  
2.057263 down  
2.064032 down  
2.145497 down  
2.416567 down  
2.011068 down  
2.625655 down  
2.622229 down  
2.086355 down  
2.054886 down

For Peer Review

2.129974 down  
2.080155 down  
2.017159 down  
2.015695 down  
2.151306 down  
2.22125 down  
2.179105 down  
2.357435 down  
2.008723 down  
2.398455 down  
2.355373 down  
2.081119 down  
2.180595 down  
2.000919 down  
2.520686 down  
2.192432 down  
2.054405 down  
2.275862 down  
2.703356 down  
2.362827 down  
2.141393 down  
2.400767 down  
2.721524 down  
2.150457 down  
2.195507 down  
2.239807 down  
2.401287 down  
2.735342 down  
2.162334 down  
2.141914 down  
2.006625 down  
2.327338 down  
2.116178 down  
2.070311 down  
2.002873 down  
2.0315 down  
2.157707 down  
2.871969 down  
2.216882 down  
2.093594 down  
2.043677 down  
2.355243 down  
2.113004 down  
2.029683 down  
2.762649 down  
2.885048 down  
2.034198 down  
2.047991 down  
2.101409 down  
2.566972 down

For Peer Review



2.225442 down  
2.058544 down  
2.273 down  
2.077674 down  
2.108393 down  
2.20189 down  
3.669959 down  
2.464279 down  
2.049762 down  
2.018282 down  
2.046079 down  
2.204131 down  
2.103302 down  
2.127765 down  
2.007382 down  
2.001825 down  
2.331112 down  
2.275404 down  
2.012796 down  
2.059275 down  
2.264828 down  
2.433531 down  
2.163238 down  
2.055126 down  
2.106128 down  
2.002128 down  
2.14592 down  
2.289826 down  
2.643061 down  
2.352367 down  
2.009916 down  
2.078801 down  
3.239017 down  
2.211312 down  
2.041867 down  
2.164501 down  
2.231653 down  
2.013304 down  
2.242015 down  
2.12689 down  
2.146624 down  
2.213201 down  
2.817222 down  
2.217923 down  
2.642067 down  
3.096384 down  
2.043243 down  
2.962459 down  
2.672883 down  
2.190923 down

For Peer Review

2.014133 down  
2.277508 down  
2.049584 down  
2.203048 down

For Peer Review

Supplementary Table 6. Differentially expressed circRNAs between the control group and the T2DM ;

| circRNA                | <i>P</i> value | Fold change | Expression | circRNA                  |
|------------------------|----------------|-------------|------------|--------------------------|
| hsa_circ_0126764_CBC1  | 0.016984       | 2.022044124 | up         | hsa_circ_0024204_CBC1    |
| hsa_circ_0006010_CBC1  | 0.008994       | 2.249768102 | up         | hsa_circ_0038475_CBC1    |
| hsa_circ_0136091_CBC1  | 0.019686       | 2.086089251 | up         | hsa_circ_0115355_CBC1    |
| hsa_circ_0086623_CBC1  | 0.021039       | 2.239429204 | up         | hsa_circ_0123377_CBC1    |
| hsa_circ_0092267_CBC1  | 0.037976       | 2.380698963 | up         | hsa_circ_0057526_CBC1    |
| hsa_circ_0030004_CBC1  | 0.008333       | 2.171569233 | up         | hsa-circRNA14362-13_CBC1 |
| hsa_circ_0028442_CBC1  | 0.026475       | 2.117823174 | up         | hsa-circRNA12505-40_CBC1 |
| hsa_circ_0086409_CBC1  | 0.009374       | 2.207621066 | up         | hsa_circ_0099580_CBC1    |
| hsa_circ_0128506_CBC1  | 0.005903       | 2.000967017 | up         | hsa_circ_0132149_CBC1    |
| hsa-circRNA5933-3_CBC1 | 0.01739        | 2.016777364 | up         | hsa_circ_0099712_CBC1    |
| hsa_circ_0084597_CBC1  | 0.011565       | 2.363456445 | up         | hsa_circ_0002949_CBC1    |
| hsa_circ_0118599_CBC1  | 0.046078       | 2.614294962 | up         | hsa_circ_0119824_CBC1    |
| hsa_circ_0103926_CBC1  | 0.010753       | 2.358715397 | up         | hsa-circRNA10051-8_CBC1  |
| hsa_circ_0026455_CBC1  | 0.027086       | 2.017809511 | up         | hsa_circ_0083544_CBC1    |
| hsa_circ_0011082_CBC1  | 0.047932       | 2.341512447 | up         | hsa_circ_0120951_CBC1    |
| hsa_circ_0133090_CBC1  | 0.016923       | 2.088925806 | up         | hsa_circ_0085163_CBC1    |
| hsa_circ_0054129_CBC1  | 0.001323       | 2.240972961 | up         | hsa_circ_0139952_CBC1    |
| hsa_circ_0003071_CBC1  | 0.048586       | 2.308543126 | up         | hsa_circ_0138400_CBC1    |
| hsa_circ_0048884_CBC1  | 0.003411       | 2.041403466 | up         | hsa-circRNA2177-25_CBC1  |
| hsa_circ_0111976_CBC1  | 0.005343       | 2.001239121 | up         | hsa_circ_0087243_CBC1    |
| hsa_circ_0068087_CBC1  | 0.00751        | 3.229334446 | up         | hsa_circ_0023761_CBC1    |
| hsa-circRNA3289_CBC1   | 0.006717       | 2.04529898  | up         | hsa_circ_0071857_CBC1    |
| hsa_circ_0033065_CBC1  | 0.033569       | 2.124550109 | up         | hsa-circRNA1958-2_CBC1   |
| hsa_circ_0121546_CBC1  | 0.02162        | 2.215477102 | up         | hsa_circ_0116853_CBC1    |
| hsa_circ_0077770_CBC1  | 0.002713       | 2.270085852 | up         | hsa_circ_0085080_CBC1    |
| hsa_circ_0124636_CBC1  | 0.001784       | 2.766144284 | up         | hsa_circ_0126845_CBC1    |
| hsa_circ_0060806_CBC1  | 0.038355       | 2.123148182 | up         | hsa_circ_0085445_CBC1    |
| hsa_circ_0054633_CBC1  | 0.004584       | 2.861681245 | up         | hsa_circ_0005684_CBC1    |
| hsa_circ_0106442_CBC1  | 0.032464       | 2.01970954  | up         | hsa_circ_0000673_CBC1    |
| hsa_circ_0061787_CBC1  | 0.025662       | 2.00967356  | up         | hsa_circ_0094904_CBC1    |
| hsa_circ_0128150_CBC1  | 0.01194        | 2.127654412 | up         | hsa_circ_0134682_CBC1    |
| hsa_circ_0129230_CBC1  | 0.026056       | 2.089618787 | up         | hsa_circ_0021570_CBC1    |
| hsa_circ_0069264_CBC1  | 0.029888       | 2.301574717 | up         | hsa_circ_0074770_CBC1    |
| hsa_circ_0102413_CBC1  | 0.008982       | 2.12221692  | up         | hsa_circ_0058526_CBC1    |
| hsa_circ_0100191_CBC1  | 0.016821       | 2.072988059 | up         | hsa_circ_0030737_CBC1    |
| hsa_circ_0130694_CBC1  | 0.033974       | 2.047005819 | up         | hsa_circ_0028009_CBC1    |
| hsa_circ_0082410_CBC1  | 0.031616       | 2.338305177 | up         | hsa_circ_0103024_CBC1    |
| hsa_circ_0023866_CBC1  | 0.030986       | 2.015871763 | up         | hsa-circRNA12910-7_CBC1  |
| hsa_circ_0126861_CBC1  | 0.001145       | 2.102522988 | up         | hsa_circ_0071841_CBC1    |
| hsa_circ_0061113_CBC1  | 0.046225       | 2.63675645  | up         | hsa_circ_0123376_CBC1    |
| hsa_circ_0066551_CBC1  | 0.003108       | 2.35068928  | up         | hsa_circ_0120335_CBC1    |
| hsa-circRNA11217_CBC1  | 0.017318       | 2.193981109 | up         | hsa_circ_0012364_CBC1    |
| hsa_circ_0111612_CBC1  | 0.047007       | 2.285882665 | up         | hsa_circ_0086460_CBC1    |
| hsa_circ_0105688_CBC1  | 0.022281       | 2.495937945 | up         | hsa_circ_0028967_CBC1    |
| hsa_circ_0090453_CBC1  | 0.039434       | 2.04903377  | up         | hsa-circRNA6282-41_CBC1  |
| hsa-circRNA4746-8_CBC1 | 0.030044       | 2.246918932 | up         | hsa_circ_0067587_CBC1    |
| hsa_circ_0010879_CBC1  | 0.007874       | 2.073467041 | up         | hsa-circRNA949-20_CBC1   |
| hsa_circ_0057701_CBC1  | 0.044949       | 2.126660273 | up         | hsa_circ_0053664_CBC1    |

|                          |          |             |    |                          |
|--------------------------|----------|-------------|----|--------------------------|
| hsa_circ_0062195_CBC1    | 0.046336 | 2.524339525 | up | hsa_circ_0135645_CBC1    |
| hsa_circ_0050044_CBC1    | 0.039758 | 2.072201928 | up | hsa_circ_0054554_CBC1    |
| hsa_circ_0119529_CBC1    | 0.009717 | 2.320735572 | up | hsa_circ_0117150_CBC1    |
| hsa_circ_0133005_CBC1    | 0.001393 | 2.164565541 | up | hsa_circ_0115373_CBC1    |
| hsa_circ_0054646_CBC1    | 0.011821 | 2.069541794 | up | hsa_circ_0037041_CBC1    |
| hsa_circ_0080517_CBC1    | 0.014562 | 2.129119081 | up | hsa-circRNA3310-95_CBC1  |
| hsa_circ_0047479_CBC1    | 0.006929 | 2.096106941 | up | hsa-circRNA12505-5_CBC1  |
| hsa_circ_0139110_CBC1    | 0.009089 | 2.604013241 | up | hsa_circ_0001467_CBC1    |
| hsa_circ_0081980_CBC1    | 0.0126   | 2.366860986 | up | hsa_circ_0064736_CBC1    |
| hsa_circ_0021637_CBC1    | 0.036964 | 2.114162173 | up | hsa_circ_0066868_CBC1    |
| hsa_circ_0061012_CBC1    | 0.009236 | 2.047808867 | up | hsa_circ_0013616_CBC1    |
| hsa_circ_0065692_CBC1    | 0.023833 | 2.003025458 | up | hsa_circ_0028966_CBC1    |
| hsa-circRNA12986-3_CBC1  | 0.044342 | 2.020711212 | up | hsa_circ_0092511_CBC1    |
| hsa_circ_0054647_CBC1    | 0.032817 | 2.19773435  | up | hsa_circ_0053636_CBC1    |
| hsa_circ_0122759_CBC1    | 0.002422 | 2.110972659 | up | hsa_circ_0025979_CBC1    |
| hsa_circ_0120470_CBC1    | 0.044311 | 2.256706539 | up | hsa-circRNA6213-4_CBC1   |
| hsa_circ_0018508_CBC1    | 0.007088 | 2.408577051 | up | hsa_circ_0085446_CBC1    |
| hsa_circ_0026158_CBC1    | 0.016334 | 2.210234966 | up | hsa_circ_0119159_CBC1    |
| hsa_circ_0043382_CBC1    | 0.032319 | 2.131058054 | up | hsa_circ_0067586_CBC1    |
| hsa_circ_0092576_CBC1    | 0.048337 | 2.004078507 | up | hsa_circ_0031047_CBC1    |
| hsa_circ_0069862_CBC1    | 0.019147 | 2.249499348 | up | hsa_circ_0089925_CBC1    |
| hsa_circ_0028886_CBC1    | 0.025852 | 2.209735093 | up | hsa_circ_0108704_CBC1    |
| hsa_circ_0133936_CBC1    | 0.015506 | 2.387386685 | up | hsa_circ_0054812_CBC1    |
| hsa_circ_0062596_CBC1    | 0.018212 | 2.547096402 | up | hsa-circRNA12883-19_CBC1 |
| hsa-circRNA15423-15_CBC1 | 0.028671 | 2.161748362 | up | hsa_circ_0056990_CBC1    |
| hsa-circRNA9652-1_CBC1   | 0.021252 | 2.612094712 | up | hsa_circ_0015676_CBC1    |
| hsa_circ_0080192_CBC1    | 0.040216 | 2.450554546 | up | hsa_circ_0096843_CBC1    |
| hsa_circ_0007858_CBC1    | 0.049341 | 2.235269666 | up | hsa_circ_0057529_CBC1    |
| hsa-circRNA13247-1_CBC1  | 0.028036 | 2.632512492 | up | hsa_circ_0098946_CBC1    |
| hsa_circ_0075700_CBC1    | 0.028119 | 2.277928489 | up | hsa_circ_0002316_CBC1    |
|                          |          |             |    | hsa-circRNA16072-9_CBC1  |
|                          |          |             |    | hsa_circ_0047877_CBC1    |
|                          |          |             |    | hsa_circ_0071866_CBC1    |
|                          |          |             |    | hsa_circ_0140077_CBC1    |
|                          |          |             |    | hsa_circ_0126894_CBC1    |
|                          |          |             |    | hsa_circ_0134291_CBC1    |
|                          |          |             |    | hsa-circRNA12505-2_CBC1  |
|                          |          |             |    | hsa_circ_0091155_CBC1    |
|                          |          |             |    | hsa_circ_0129896_CBC1    |
|                          |          |             |    | hsa_circ_0101628_CBC1    |
|                          |          |             |    | hsa_circ_0040028_CBC1    |
|                          |          |             |    | hsa_circ_0118394_CBC1    |
|                          |          |             |    | hsa-circRNA12505-26_CBC1 |
|                          |          |             |    | hsa_circ_0030740_CBC1    |
|                          |          |             |    | hsa_circ_0054778_CBC1    |
|                          |          |             |    | hsa_circ_0003905_CBC1    |
|                          |          |             |    | hsa_circ_0069228_CBC1    |
|                          |          |             |    | hsa-circRNA14020-21_CBC1 |
|                          |          |             |    | hsa_circ_0117499_CBC1    |
|                          |          |             |    | hsa_circ_0071853_CBC1    |

hsa\_circ\_0016817\_CBC1  
hsa\_circ\_0069533\_CBC1  
hsa\_circ\_0117183\_CBC1  
hsa\_circ\_0118288\_CBC1  
hsa\_circ\_0091154\_CBC1  
hsa\_circ\_0009133\_CBC1  
hsa\_circ\_0047651\_CBC1  
hsa\_circ\_0111501\_CBC1  
hsa\_circ\_0089932\_CBC1  
hsa\_circ\_0088295\_CBC1  
hsa\_circ\_0077656\_CBC1  
hsa\_circ\_0054095\_CBC1  
hsa\_circ\_0120954\_CBC1  
hsa\_circ\_0104186\_CBC1  
hsa\_circ\_0140078\_CBC1  
hsa\_circ\_0114306\_CBC1  
hsa-circRNA14317-3\_CBC1  
hsa\_circ\_0114302\_CBC1  
hsa-circRNA10051-11\_CBC1  
hsa\_circ\_0028968\_CBC1  
hsa\_circ\_0009036\_CBC1  
hsa\_circ\_0015678\_CBC1  
hsa\_circ\_0099436\_CBC1  
hsa\_circ\_0053329\_CBC1  
hsa\_circ\_0071220\_CBC1  
hsa\_circ\_0127531\_CBC1  
hsa\_circ\_0028965\_CBC1  
hsa\_circ\_0028008\_CBC1  
hsa\_circ\_0023773\_CBC1  
hsa\_circ\_0107665\_CBC1  
hsa\_circ\_0038250\_CBC1  
hsa\_circ\_0138403\_CBC1  
hsa\_circ\_0053641\_CBC1  
hsa\_circ\_0139201\_CBC1  
hsa\_circ\_0037887\_CBC1  
hsa\_circ\_0031939\_CBC1  
hsa-circRNA6756-36\_CBC1  
hsa\_circ\_0069397\_CBC1  
hsa\_circ\_0140287\_CBC1  
hsa\_circ\_0067588\_CBC1  
hsa-circRNA7697-20\_CBC1  
hsa\_circ\_0130488\_CBC1  
hsa-circRNA2198-13\_CBC1  
hsa\_circ\_0054728\_CBC1  
hsa\_circ\_0138402\_CBC1  
hsa-circRNA16072-18\_CBC1  
hsa\_circ\_0069532\_CBC1  
hsa-circRNA12693-13\_CBC1  
hsa\_circ\_0026573\_CBC1  
hsa-circRNA9015-34\_CBC1



hsa-circRNA3487-6\_CBC1  
hsa\_circ\_0075045\_CBC1  
hsa-circRNA10767\_CBC1  
hsa\_circ\_0072732\_CBC1  
hsa\_circ\_0127462\_CBC1  
hsa\_circ\_0105010\_CBC1  
hsa\_circ\_0081889\_CBC1  
hsa\_circ\_0129104\_CBC1  
hsa-circRNA15514-9\_CBC1  
hsa\_circ\_0085406\_CBC1  
hsa\_circ\_0084645\_CBC1  
hsa\_circ\_0133355\_CBC1  
hsa-circRNA12520-159\_CBC1  
hsa-circRNA4380-15\_CBC1  
hsa\_circ\_0136904\_CBC1  
hsa\_circ\_0039423\_CBC1  
hsa\_circ\_0069410\_CBC1  
hsa\_circ\_0013489\_CBC1  
hsa\_circ\_0005567\_CBC1  
hsa\_circ\_0136060\_CBC1  
hsa-circRNA6510-1\_CBC1  
hsa\_circ\_0057280\_CBC1  
hsa\_circ\_0073828\_CBC1  
hsa\_circ\_0126693\_CBC1  
hsa-circRNA9640-24\_CBC1  
hsa\_circ\_0085444\_CBC1  
hsa-circRNA15511-5\_CBC1  
hsa-circRNA9274-3\_CBC1  
hsa\_circ\_0001494\_CBC1  
hsa\_circ\_0001774\_CBC1  
hsa\_circ\_0054985\_CBC1  
hsa\_circ\_0066238\_CBC1  
hsa\_circ\_0127537\_CBC1  
hsa\_circ\_0137811\_CBC1  
hsa\_circ\_0130333\_CBC1  
hsa\_circ\_0007018\_CBC1  
hsa\_circ\_0078516\_CBC1  
hsa\_circ\_0119156\_CBC1  
hsa\_circ\_0055894\_CBC1  
hsa-circRNA14588-10\_CBC1  
hsa\_circ\_0011826\_CBC1  
hsa\_circ\_0060740\_CBC1  
hsa\_circ\_0027365\_CBC1  
hsa\_circ\_0075043\_CBC1  
hsa\_circ\_0135599\_CBC1  
hsa\_circ\_0029870\_CBC1  
hsa\_circ\_0128169\_CBC1  
hsa-circRNA12520-31\_CBC1  
hsa-circRNA9834-7\_CBC1  
hsa\_circ\_0117172\_CBC1

hsa\_circ\_0074588\_CBC1  
hsa\_circ\_0034966\_CBC1  
hsa\_circ\_0140080\_CBC1  
hsa-circRNA12520-47\_CBC1  
hsa\_circ\_0127442\_CBC1  
hsa\_circ\_0119266\_CBC1  
hsa\_circ\_0072733\_CBC1  
hsa\_circ\_0129397\_CBC1  
hsa-circRNA12505-55\_CBC1  
hsa\_circ\_0009070\_CBC1  
hsa\_circ\_0092672\_CBC1  
hsa\_circ\_0035593\_CBC1  
hsa\_circ\_0054734\_CBC1  
hsa\_circ\_0021780\_CBC1  
hsa\_circ\_0071855\_CBC1  
hsa-circRNA2177-30\_CBC1  
hsa\_circ\_0016278\_CBC1  
hsa\_circ\_0109315\_CBC1  
hsa\_circ\_0028010\_CBC1  
hsa\_circ\_0140073\_CBC1  
hsa\_circ\_0039353\_CBC1  
hsa\_circ\_0029681\_CBC1  
hsa-circRNA10165-8\_CBC1  
hsa-circRNA15265-3\_CBC1  
hsa\_circ\_0094900\_CBC1  
hsa-circRNA14910-11\_CBC1  
hsa\_circ\_0095180\_CBC1  
hsa\_circ\_0031862\_CBC1  
hsa-circRNA1958-5\_CBC1  
hsa-circRNA5762-14\_CBC1  
hsa\_circ\_0071865\_CBC1  
hsa-circRNA6396-26\_CBC1  
hsa\_circ\_0087215\_CBC1  
hsa-circRNA10329-63\_CBC1  
hsa\_circ\_0117148\_CBC1  
hsa\_circ\_0120341\_CBC1  
hsa\_circ\_0053327\_CBC1  
hsa\_circ\_0027801\_CBC1  
hsa\_circ\_0025977\_CBC1  
hsa-circRNA15591-21\_CBC1  
hsa-circRNA3081-40\_CBC1  
hsa\_circ\_0004083\_CBC1  
hsa-circRNA5762-18\_CBC1  
hsa\_circ\_0007090\_CBC1  
hsa\_circ\_0025973\_CBC1  
hsa\_circ\_0060232\_CBC1  
hsa\_circ\_0119707\_CBC1  
hsa-circRNA7969-7\_CBC1  
hsa\_circ\_0131079\_CBC1  
hsa\_circ\_0001347\_CBC1

hsa\_circ\_0136924\_CBC1  
hsa\_circ\_0044870\_CBC1  
hsa\_circ\_0047632\_CBC1  
hsa\_circ\_0101921\_CBC1  
hsa\_circ\_0024206\_CBC1  
hsa-circRNA15511-9\_CBC1  
hsa\_circ\_0071390\_CBC1  
hsa\_circ\_0038470\_CBC1  
hsa\_circ\_0134173\_CBC1  
hsa\_circ\_0099702\_CBC1  
hsa\_circ\_0119710\_CBC1  
hsa\_circ\_0129029\_CBC1  
hsa\_circ\_0094899\_CBC1  
hsa\_circ\_0023779\_CBC1  
hsa-circRNA15564-3\_CBC1  
hsa\_circ\_0132592\_CBC1  
hsa\_circ\_0040358\_CBC1  
hsa\_circ\_0105527\_CBC1  
hsa\_circ\_0066232\_CBC1  
hsa\_circ\_0117152\_CBC1  
hsa\_circ\_0035597\_CBC1  
hsa\_circ\_0121926\_CBC1  
hsa\_circ\_0054555\_CBC1  
hsa\_circ\_0025985\_CBC1  
hsa\_circ\_0041697\_CBC1  
hsa\_circ\_0000544\_CBC1  
hsa\_circ\_0110429\_CBC1  
hsa\_circ\_0049355\_CBC1  
hsa\_circ\_0076215\_CBC1  
hsa\_circ\_0054731\_CBC1  
hsa\_circ\_0140074\_CBC1  
hsa\_circ\_0117173\_CBC1  
hsa-circRNA8659-9\_CBC1  
hsa\_circ\_0120602\_CBC1  
hsa\_circ\_0119827\_CBC1  
hsa\_circ\_0120560\_CBC1  
hsa\_circ\_0017335\_CBC1  
hsa\_circ\_0024215\_CBC1  
hsa\_circ\_0115372\_CBC1  
hsa\_circ\_0093710\_CBC1  
hsa\_circ\_0095347\_CBC1  
hsa\_circ\_0037889\_CBC1  
hsa-circRNA7944-6\_CBC1  
hsa-circRNA10450-30\_CBC1  
hsa\_circ\_0071229\_CBC1  
hsa\_circ\_0127538\_CBC1  
hsa-circRNA12505-31\_CBC1  
hsa\_circ\_0047373\_CBC1  
hsa\_circ\_0129396\_CBC1  
hsa\_circ\_0140563\_CBC1

hsa\_circ\_0073470\_CBC1  
hsa\_circ\_0038472\_CBC1  
hsa-circRNA15591-31\_CBC1  
hsa\_circ\_0083837\_CBC1  
hsa\_circ\_0106175\_CBC1  
hsa\_circ\_0124317\_CBC1  
hsa\_circ\_0053760\_CBC1  
hsa\_circ\_0052756\_CBC1  
hsa\_circ\_0105886\_CBC1  
hsa\_circ\_0030731\_CBC1  
hsa\_circ\_0094884\_CBC1  
hsa\_circ\_0127463\_CBC1  
hsa\_circ\_0083169\_CBC1  
hsa\_circ\_0096518\_CBC1  
hsa\_circ\_0023757\_CBC1  
hsa-circRNA5011-23\_CBC1  
hsa\_circ\_0023780\_CBC1  
hsa\_circ\_0084642\_CBC1  
hsa-circRNA10656-34\_CBC1  
hsa-circRNA12520-172\_CBC1  
hsa\_circ\_0105778\_CBC1  
hsa\_circ\_0098355\_CBC1  
hsa-circRNA409-3\_CBC1  
hsa\_circ\_0104551\_CBC1  
hsa\_circ\_0030739\_CBC1  
hsa\_circ\_0120604\_CBC1  
hsa\_circ\_0106657\_CBC1  
hsa\_circ\_0057764\_CBC1  
hsa\_circ\_0099711\_CBC1  
hsa\_circ\_0099990\_CBC1  
hsa\_circ\_0033112\_CBC1  
hsa-circRNA11806-28\_CBC1  
hsa\_circ\_0132239\_CBC1  
hsa\_circ\_0104275\_CBC1  
hsa\_circ\_0054730\_CBC1  
hsa-circRNA2591-9\_CBC1  
hsa-circRNA7550-33\_CBC1  
hsa-circRNA2198-7\_CBC1  
hsa\_circ\_0120323\_CBC1  
hsa\_circ\_0120339\_CBC1  
hsa\_circ\_0008855\_CBC1  
hsa-circRNA4610-36\_CBC1  
hsa\_circ\_0120342\_CBC1  
hsa\_circ\_0054761\_CBC1  
hsa-circRNA12505-51\_CBC1  
hsa-circRNA12520-126\_CBC1  
hsa\_circ\_0041155\_CBC1  
hsa\_circ\_0084643\_CBC1  
hsa\_circ\_0120607\_CBC1  
hsa\_circ\_0027702\_CBC1

hsa\_circ\_0075564\_CBC1  
hsa-circRNA8505-7\_CBC1  
hsa\_circ\_0140076\_CBC1  
hsa\_circ\_0138382\_CBC1  
hsa\_circ\_0071858\_CBC1  
hsa\_circ\_0029812\_CBC1  
hsa\_circ\_0031081\_CBC1  
hsa\_circ\_0030732\_CBC1  
hsa\_circ\_0015672\_CBC1  
hsa\_circ\_0111502\_CBC1  
hsa\_circ\_0134171\_CBC1  
hsa\_circ\_0016397\_CBC1  
hsa\_circ\_0001168\_CBC1  
hsa-circRNA10072-4\_CBC1  
hsa-circRNA7550-9\_CBC1  
hsa-circRNA5854-5\_CBC1  
hsa\_circ\_0022301\_CBC1  
hsa-circRNA6489-15\_CBC1  
hsa\_circ\_0120605\_CBC1  
hsa-circRNA3081-2\_CBC1  
hsa-circRNA7104-135\_CBC1  
hsa\_circ\_0122354\_CBC1  
hsa-circRNA4388-10\_CBC1  
hsa\_circ\_0087212\_CBC1  
hsa\_circ\_0140534\_CBC1  
hsa\_circ\_0140292\_CBC1  
hsa-circRNA7697-35\_CBC1  
hsa\_circ\_0092459\_CBC1  
hsa\_circ\_0079321\_CBC1  
hsa\_circ\_0077414\_CBC1  
hsa\_circ\_0112542\_CBC1  
hsa\_circ\_0025441\_CBC1  
hsa\_circ\_0047630\_CBC1  
hsa\_circ\_0120559\_CBC1  
hsa\_circ\_0022919\_CBC1  
hsa\_circ\_0076400\_CBC1  
hsa\_circ\_0031863\_CBC1  
hsa-circRNA12505-15\_CBC1  
hsa\_circ\_0054726\_CBC1  
hsa\_circ\_0120606\_CBC1  
hsa\_circ\_0000849\_CBC1  
hsa\_circ\_0135075\_CBC1  
hsa\_circ\_0122182\_CBC1  
hsa-circRNA7619-1\_CBC1  
hsa\_circ\_0094898\_CBC1  
hsa\_circ\_0053665\_CBC1  
hsa\_circ\_0126352\_CBC1  
hsa\_circ\_0051623\_CBC1  
hsa\_circ\_0140081\_CBC1  
hsa\_circ\_0034370\_CBC1



hsa\_circ\_0072730\_CBC1  
hsa\_circ\_0071250\_CBC1  
hsa\_circ\_0105779\_CBC1  
hsa\_circ\_0038424\_CBC1  
hsa\_circ\_0069885\_CBC1  
hsa-circRNA11783-2\_CBC1  
hsa-circRNA4380-6\_CBC1  
hsa\_circ\_0053657\_CBC1  
hsa-circRNA3069-7\_CBC1  
hsa\_circ\_0126839\_CBC1  
hsa-circRNA13479-39\_CBC1  
hsa\_circ\_0016790\_CBC1  
hsa\_circ\_0062796\_CBC1

For Peer Review

## group.

| <b>P value</b> | <b>Fold change</b> | <b>Expression</b> |
|----------------|--------------------|-------------------|
| 0.000865       | 2.144735837        | down              |
| 0.017062       | 2.000066324        | down              |
| 2.52E-06       | 2.542557613        | down              |
| 0.000201       | 2.406811218        | down              |
| 0.000583       | 2.031741273        | down              |
| 0.007288       | 2.044468767        | down              |
| 0.003095       | 2.089844369        | down              |
| 4.09E-05       | 2.993605011        | down              |
| 2.46E-05       | 2.24542424         | down              |
| 3.22E-05       | 2.090707439        | down              |
| 0.01631        | 2.041505275        | down              |
| 0.00367        | 2.2526936          | down              |
| 0.006778       | 2.278372845        | down              |
| 0.012888       | 2.055565017        | down              |
| 1.31E-05       | 2.607942265        | down              |
| 5.93E-05       | 2.068845013        | down              |
| 0.008704       | 2.389676706        | down              |
| 0.000621       | 2.075012811        | down              |
| 5.63E-06       | 2.639047422        | down              |
| 0.003383       | 2.060686807        | down              |
| 4.42E-06       | 2.051425721        | down              |
| 0.00011        | 2.200639362        | down              |
| 0.002422       | 2.714527823        | down              |
| 0.003722       | 2.05955015         | down              |
| 0.002388       | 2.094568572        | down              |
| 0.000258       | 2.079902552        | down              |
| 0.016981       | 2.105805426        | down              |
| 0.000305       | 2.051106824        | down              |
| 0.000253       | 2.563429559        | down              |
| 9.23E-05       | 2.605337447        | down              |
| 0.016544       | 2.008116256        | down              |
| 0.001688       | 2.138151213        | down              |
| 8.16E-05       | 2.104123072        | down              |
| 8.21E-05       | 2.108443015        | down              |
| 2.84E-05       | 2.071511941        | down              |
| 0.001794       | 2.81525994         | down              |
| 1.09E-05       | 2.184603374        | down              |
| 0.000638       | 2.111537764        | down              |
| 0.000361       | 2.069637581        | down              |
| 0.000536       | 2.063793387        | down              |
| 0.009159       | 2.140508237        | down              |
| 0.01735        | 2.108945574        | down              |
| 0.006015       | 2.172357224        | down              |
| 0.001337       | 2.05978994         | down              |
| 0.012277       | 2.034066691        | down              |
| 3.88E-05       | 2.143833915        | down              |
| 8.5E-08        | 2.014839984        | down              |
| 3.36E-05       | 2.052935451        | down              |

|          |             |      |
|----------|-------------|------|
| 0.003433 | 3.027540061 | down |
| 0.020688 | 2.13639583  | down |
| 4.41E-05 | 2.039102786 | down |
| 3.83E-06 | 2.163058447 | down |
| 4.68E-05 | 2.058396585 | down |
| 0.005461 | 2.010861027 | down |
| 0.003084 | 2.107958189 | down |
| 2.75E-05 | 2.352907097 | down |
| 0.000202 | 2.010143176 | down |
| 0.000594 | 2.005280229 | down |
| 0.000405 | 2.050685646 | down |
| 0.0003   | 2.080197105 | down |
| 0.012501 | 2.3911096   | down |
| 0.026678 | 2.000193988 | down |
| 0.000644 | 2.061351358 | down |
| 8.53E-05 | 2.081487247 | down |
| 0.002557 | 2.025571691 | down |
| 0.000131 | 2.085536304 | down |
| 0.000119 | 2.095567968 | down |
| 0.012162 | 2.165860131 | down |
| 0.004785 | 2.314375809 | down |
| 0.018728 | 2.102395239 | down |
| 0.001399 | 2.175179101 | down |
| 0.00028  | 2.131779482 | down |
| 0.01382  | 2.336248431 | down |
| 0.004293 | 2.010261036 | down |
| 0.003201 | 2.40727486  | down |
| 3.63E-05 | 2.117571544 | down |
| 0.000425 | 2.074522663 | down |
| 0.026402 | 2.028824444 | down |
| 6.15E-06 | 2.20363372  | down |
| 0.000412 | 2.023562057 | down |
| 1.19E-05 | 2.121358587 | down |
| 1.4E-05  | 2.593678924 | down |
| 0.002715 | 2.203812593 | down |
| 0.001632 | 2.013816321 | down |
| 0.000602 | 2.331389046 | down |
| 0.000181 | 2.231415633 | down |
| 5.38E-06 | 2.292648117 | down |
| 0.002966 | 2.102299855 | down |
| 0.00052  | 2.513982958 | down |
| 0.001228 | 2.042045343 | down |
| 0.000769 | 2.153931464 | down |
| 5.87E-05 | 3.124825585 | down |
| 8.3E-05  | 2.683782994 | down |
| 0.001045 | 2.223356984 | down |
| 0.000276 | 2.418803119 | down |
| 1.89E-05 | 2.173515901 | down |
| 0.000639 | 2.076210312 | down |
| 4.73E-05 | 2.078918174 | down |

|          |             |      |
|----------|-------------|------|
| 0.027471 | 2.203433313 | down |
| 0.00325  | 2.021565922 | down |
| 0.000458 | 2.000890996 | down |
| 0.007881 | 2.106009452 | down |
| 0.000354 | 2.030597161 | down |
| 0.006166 | 2.093489678 | down |
| 0.000463 | 2.046251509 | down |
| 6.18E-05 | 2.032700803 | down |
| 0.018726 | 2.146652996 | down |
| 0.000783 | 2.003268932 | down |
| 2.75E-05 | 2.003415707 | down |
| 7.07E-05 | 2.033918246 | down |
| 0.001442 | 2.720158107 | down |
| 0.002733 | 2.482835732 | down |
| 8.17E-06 | 2.227870413 | down |
| 0.024117 | 2.004914565 | down |
| 0.000634 | 2.338996541 | down |
| 0.000915 | 2.413114019 | down |
| 0.016334 | 2.1195399   | down |
| 0.001639 | 2.172988375 | down |
| 0.000247 | 2.200455487 | down |
| 0.00156  | 2.083227533 | down |
| 0.030518 | 2.596996315 | down |
| 0.000755 | 2.171370724 | down |
| 0.00085  | 2.09070733  | down |
| 0.045271 | 2.757653372 | down |
| 0.000188 | 2.062541392 | down |
| 0.008013 | 2.160295676 | down |
| 0.001062 | 2.207422486 | down |
| 0.021936 | 2.39720742  | down |
| 0.001191 | 2.29515655  | down |
| 0.000162 | 2.097118399 | down |
| 0.000388 | 2.331295068 | down |
| 0.000107 | 2.025025571 | down |
| 2.81E-05 | 2.502971825 | down |
| 0.043945 | 2.321890003 | down |
| 0.000199 | 2.0260333   | down |
| 0.000241 | 2.128561308 | down |
| 2.75E-05 | 2.067415777 | down |
| 5.48E-05 | 2.132344127 | down |
| 0.019318 | 2.33055852  | down |
| 0.000141 | 2.066642482 | down |
| 0.00299  | 2.692596243 | down |
| 0.003517 | 2.111676361 | down |
| 0.001274 | 2.038525096 | down |
| 0.000394 | 2.031183164 | down |
| 0.016327 | 2.052072629 | down |
| 0.000116 | 2.038128228 | down |
| 0.010039 | 2.367469583 | down |
| 9.87E-06 | 2.553657577 | down |

|          |             |      |
|----------|-------------|------|
| 0.000407 | 2.434532335 | down |
| 0.003461 | 2.030848192 | down |
| 0.00649  | 2.018089589 | down |
| 0.001815 | 2.402770198 | down |
| 0.000904 | 2.011837921 | down |
| 9.43E-05 | 2.480056318 | down |
| 0.000196 | 2.138436326 | down |
| 0.021567 | 2.635843345 | down |
| 0.000437 | 2.107831966 | down |
| 0.000619 | 2.65125938  | down |
| 0.006101 | 2.499580498 | down |
| 0.007043 | 2.52840525  | down |
| 0.001047 | 2.216128369 | down |
| 0.000964 | 2.065063801 | down |
| 3.69E-05 | 2.364913485 | down |
| 0.001337 | 2.103615006 | down |
| 0.013703 | 2.028086648 | down |
| 0.000623 | 2.325437469 | down |
| 0.007341 | 2.007056111 | down |
| 0.030765 | 2.012222535 | down |
| 3.22E-05 | 2.376880398 | down |
| 0.01585  | 2.42942282  | down |
| 0.000442 | 2.02639073  | down |
| 0.003875 | 2.188650857 | down |
| 8.89E-05 | 2.048521197 | down |
| 0.001756 | 2.092396486 | down |
| 0.003815 | 2.209653633 | down |
| 0.023147 | 2.00692372  | down |
| 0.012844 | 2.180202839 | down |
| 0.001045 | 2.005295792 | down |
| 3.67E-05 | 2.21479828  | down |
| 0.000448 | 2.226323696 | down |
| 5.19E-06 | 2.238543506 | down |
| 8.47E-06 | 2.103295369 | down |
| 0.000221 | 2.219494658 | down |
| 0.000868 | 2.156734584 | down |
| 0.004119 | 2.053905306 | down |
| 0.014249 | 2.265975506 | down |
| 0.000523 | 2.014797509 | down |
| 0.000837 | 2.207853239 | down |
| 0.000972 | 2.105351134 | down |
| 6.94E-05 | 2.180658281 | down |
| 0.000381 | 2.078127979 | down |
| 0.007131 | 3.136855292 | down |
| 6.22E-06 | 2.076198538 | down |
| 7.9E-05  | 2.129389005 | down |
| 0.019083 | 2.241442398 | down |
| 0.001946 | 2.214808978 | down |
| 0.024165 | 2.042187648 | down |
| 0.009172 | 2.140891718 | down |

|          |             |      |
|----------|-------------|------|
| 0.000404 | 2.106570906 | down |
| 0.017851 | 2.007530192 | down |
| 1.59E-05 | 2.241480822 | down |
| 0.000828 | 2.545941597 | down |
| 0.00028  | 2.007773305 | down |
| 4.5E-05  | 2.389819577 | down |
| 0.004618 | 2.024710277 | down |
| 0.001967 | 2.241561742 | down |
| 0.041406 | 2.015257159 | down |
| 0.003666 | 2.084079848 | down |
| 0.002575 | 2.094283067 | down |
| 0.004556 | 2.018061433 | down |
| 0.005869 | 3.058613298 | down |
| 7.36E-06 | 2.375065718 | down |
| 3.1E-05  | 2.107139669 | down |
| 7.68E-06 | 2.613854259 | down |
| 0.027353 | 2.314565292 | down |
| 0.000484 | 2.011786533 | down |
| 0.003664 | 2.409793957 | down |
| 7.96E-06 | 2.237276476 | down |
| 0.003554 | 2.268477549 | down |
| 0.000926 | 2.028428525 | down |
| 0.000399 | 2.231095763 | down |
| 0.000287 | 2.047232339 | down |
| 0.000601 | 2.261397068 | down |
| 0.000237 | 2.092810067 | down |
| 0.048322 | 2.010384465 | down |
| 0.010574 | 2.097040115 | down |
| 0.011606 | 2.048974235 | down |
| 0.000173 | 2.04473729  | down |
| 1.19E-05 | 2.296681988 | down |
| 0.007885 | 2.051596107 | down |
| 0.000937 | 2.025430808 | down |
| 0.041171 | 2.048887911 | down |
| 0.000197 | 2.254954466 | down |
| 0.020424 | 2.252924181 | down |
| 0.002591 | 2.17597246  | down |
| 0.00119  | 2.219809604 | down |
| 0.000981 | 2.186876682 | down |
| 0.007673 | 2.328856732 | down |
| 8.49E-07 | 2.027801748 | down |
| 0.013515 | 2.013359544 | down |
| 0.001369 | 2.250828764 | down |
| 0.008237 | 2.083793063 | down |
| 0.000263 | 2.361372041 | down |
| 0.041905 | 2.036461123 | down |
| 0.002583 | 2.14348679  | down |
| 0.005529 | 2.088090094 | down |
| 0.000805 | 2.016320158 | down |
| 0.004404 | 2.160058852 | down |



|          |             |      |
|----------|-------------|------|
| 0.031139 | 2.08822483  | down |
| 0.00011  | 2.060713137 | down |
| 0.028351 | 2.232374107 | down |
| 0.013929 | 2.308656139 | down |
| 0.006886 | 2.216945432 | down |
| 0.015448 | 2.007605671 | down |
| 0.003401 | 2.142897451 | down |
| 7.23E-06 | 2.239877042 | down |
| 0.003653 | 2.100897498 | down |
| 0.000718 | 2.084424516 | down |
| 0.002016 | 2.27065474  | down |
| 0.007437 | 2.024694516 | down |
| 0.00289  | 2.910284005 | down |
| 8.61E-05 | 2.224313286 | down |
| 0.003339 | 2.005258942 | down |
| 0.010986 | 2.076860887 | down |
| 0.019191 | 2.04363786  | down |
| 0.000785 | 3.188795913 | down |
| 0.00299  | 2.210613842 | down |
| 2.99E-05 | 2.032900299 | down |
| 0.00929  | 2.038271967 | down |
| 0.035022 | 2.115831497 | down |
| 0.000783 | 2.555402109 | down |
| 0.000874 | 2.175732458 | down |
| 0.000223 | 2.636052874 | down |
| 9.46E-05 | 2.037994974 | down |
| 0.000299 | 2.082748292 | down |
| 0.013955 | 2.293529756 | down |
| 0.018959 | 2.38324329  | down |
| 4.08E-05 | 2.139753008 | down |
| 0.00255  | 2.031193319 | down |
| 0.005451 | 2.111027098 | down |
| 0.000912 | 2.168356861 | down |
| 0.003909 | 2.146075743 | down |
| 9.52E-06 | 2.215417485 | down |
| 0.000203 | 2.273572356 | down |
| 3.27E-06 | 2.233575051 | down |
| 0.000512 | 2.064546661 | down |
| 0.000243 | 2.204279834 | down |
| 0.005311 | 2.364696855 | down |
| 0.002664 | 2.26853748  | down |
| 0.000421 | 2.077177201 | down |
| 0.01011  | 2.374705372 | down |
| 0.002082 | 2.302980744 | down |
| 0.000148 | 2.006782937 | down |
| 0.015352 | 2.153964962 | down |
| 0.000854 | 2.225548324 | down |
| 0.008611 | 2.094672695 | down |
| 0.000113 | 2.272997063 | down |
| 0.000356 | 2.010991993 | down |

|          |             |      |
|----------|-------------|------|
| 1.76E-06 | 2.574113495 | down |
| 5.97E-05 | 2.013105013 | down |
| 0.001893 | 2.253343858 | down |
| 0.034043 | 2.397358707 | down |
| 0.00433  | 2.040118781 | down |
| 0.006564 | 2.301102939 | down |
| 0.006349 | 2.072077638 | down |
| 0.002576 | 2.016192156 | down |
| 0.000911 | 2.365673341 | down |
| 1.05E-05 | 2.54433863  | down |
| 6.93E-05 | 2.021043177 | down |
| 0.000162 | 2.062534574 | down |
| 0.00058  | 2.029665213 | down |
| 3.79E-05 | 2.10843738  | down |
| 0.001715 | 2.054555332 | down |
| 0.000732 | 2.226937518 | down |
| 6.32E-06 | 2.057534227 | down |
| 0.00427  | 2.467727065 | down |
| 9.81E-06 | 2.065026087 | down |
| 0.0005   | 2.107841974 | down |
| 0.001371 | 2.222050011 | down |
| 0.003828 | 2.450058612 | down |
| 1.22E-05 | 2.16765962  | down |
| 3.42E-05 | 2.137059606 | down |
| 0.000363 | 2.564258285 | down |
| 0.004788 | 2.091507311 | down |
| 0.001822 | 2.064974474 | down |
| 0.015895 | 2.394525176 | down |
| 3.35E-05 | 3.097114926 | down |
| 0.000755 | 2.07690474  | down |
| 0.00075  | 2.110699546 | down |
| 7.58E-05 | 2.653641611 | down |
| 0.001741 | 2.120717125 | down |
| 6.51E-06 | 2.077612562 | down |
| 0.001981 | 2.212480635 | down |
| 0.001676 | 2.022808001 | down |
| 0.000662 | 2.131822067 | down |
| 0.007122 | 2.437550624 | down |
| 0.000942 | 2.002521318 | down |
| 0.000344 | 2.204674038 | down |
| 1.53E-05 | 2.229911809 | down |
| 6.2E-05  | 2.143830362 | down |
| 0.001214 | 2.075431484 | down |
| 0.000126 | 2.251181084 | down |
| 0.002222 | 2.172500674 | down |
| 3.27E-06 | 2.312505635 | down |
| 0.002839 | 2.023899586 | down |
| 0.006792 | 2.391828458 | down |
| 0.000143 | 2.299040846 | down |
| 0.017915 | 2.603582198 | down |

|          |             |      |
|----------|-------------|------|
| 4.13E-05 | 2.259137333 | down |
| 0.000762 | 2.159267243 | down |
| 5.3E-07  | 2.3686917   | down |
| 0.000218 | 2.356384972 | down |
| 0.000381 | 2.09875306  | down |
| 0.016763 | 2.052461473 | down |
| 0.030042 | 2.012319795 | down |
| 4.49E-05 | 2.641793132 | down |
| 0.005345 | 2.034364907 | down |
| 0.000766 | 2.162544421 | down |
| 0.004827 | 2.301022273 | down |
| 0.000243 | 2.357203534 | down |
| 0.004951 | 2.071058139 | down |
| 0.000706 | 2.002463388 | down |
| 0.000949 | 2.127114155 | down |
| 0.009669 | 2.015633302 | down |
| 0.003144 | 2.15590979  | down |
| 0.000548 | 2.131816304 | down |
| 0.008344 | 2.019168399 | down |
| 1.6E-05  | 2.057378968 | down |
| 0.000175 | 2.043994293 | down |
| 0.001656 | 2.017862299 | down |
| 0.003207 | 2.322783732 | down |
| 0.000608 | 2.325584155 | down |
| 0.000437 | 2.318776195 | down |
| 3.4E-05  | 2.614294586 | down |
| 0.003982 | 2.024842651 | down |
| 0.007276 | 2.015608927 | down |
| 0.023981 | 2.004296303 | down |
| 0.00802  | 2.024246461 | down |
| 0.001037 | 2.104623925 | down |
| 0.002727 | 2.654122629 | down |
| 5.9E-05  | 2.586703755 | down |
| 0.00023  | 2.137310394 | down |
| 0.031277 | 2.357283936 | down |
| 0.000183 | 2.067007274 | down |
| 0.00986  | 2.049994137 | down |
| 0.00118  | 2.461060433 | down |
| 0.000639 | 2.383106295 | down |
| 8.19E-05 | 2.212399388 | down |
| 0.000969 | 2.072136871 | down |
| 3.51E-05 | 2.138538348 | down |
| 0.002454 | 2.094651694 | down |
| 0.033727 | 2.178847503 | down |
| 6.72E-05 | 2.096962448 | down |
| 0.001836 | 2.05975356  | down |
| 0.047045 | 2.277481684 | down |
| 0.048137 | 2.009712267 | down |
| 0.000221 | 2.53183187  | down |
| 0.004069 | 2.007261142 | down |

|          |             |      |
|----------|-------------|------|
| 0.002296 | 2.29489645  | down |
| 0.001973 | 3.068453399 | down |
| 1.69E-05 | 2.271773467 | down |
| 0.001705 | 2.078069657 | down |
| 0.003134 | 2.04373036  | down |
| 0.000206 | 2.41579659  | down |
| 0.000553 | 2.012071679 | down |
| 0.000132 | 2.061223946 | down |
| 1.66E-05 | 2.160935869 | down |
| 4.87E-05 | 2.178640723 | down |
| 0.005026 | 2.812544445 | down |
| 0.003702 | 2.859665876 | down |
| 0.037356 | 2.025369231 | down |

For Peer Review

Supplementary Table 7. Differentially expressed circRNAs between the control group and the c

| circRNA                 | P value  | Fold change | Expression | circRNA                 |
|-------------------------|----------|-------------|------------|-------------------------|
| hsa_circ_0138686_CBC1   | 0.035192 | 2.026978237 | up         | hsa_circ_0099580_CBC1   |
| hsa_circ_0000965_CBC1   | 0.001969 | 2.032160077 | up         | hsa_circ_0134682_CBC1   |
| hsa_circ_0123039_CBC1   | 0.016452 | 2.098663613 | up         | hsa_circ_0097987_CBC1   |
| hsa_circ_0110784_CBC1   | 0.002362 | 2.108163671 | up         | hsa_circ_0129392_CBC1   |
| hsa-circRNA1721-10_CBC1 | 0.012351 | 2.291017984 | up         | hsa_circ_0118616_CBC1   |
| hsa_circ_0104690_CBC1   | 0.004948 | 2.150079858 | up         | hsa_circ_0104077_CBC1   |
| hsa-circRNA15743-4_CBC1 | 2.8E-05  | 2.102581473 | up         | hsa_circ_0089925_CBC1   |
| hsa_circ_0068498_CBC1   | 0.040915 | 2.385498517 | up         | hsa_circ_0056990_CBC1   |
| hsa_circ_0097101_CBC1   | 0.014895 | 2.324084184 | up         | hsa_circ_0134770_CBC1   |
| hsa_circ_0081170_CBC1   | 0.045165 | 2.117840388 | up         | hsa_circ_0127781_CBC1   |
| hsa_circ_0092267_CBC1   | 0.020145 | 2.691547818 | up         | hsa_circ_0126894_CBC1   |
| hsa_circ_0120106_CBC1   | 0.007423 | 2.198070226 | up         | hsa-circRNA9428-41_CBC1 |
| hsa_circ_0078009_CBC1   | 0.035537 | 2.04399502  | up         | hsa_circ_0040028_CBC1   |
| hsa_circ_0130545_CBC1   | 0.022564 | 2.274689356 | up         | hsa_circ_0025754_CBC1   |
| hsa_circ_0058644_CBC1   | 0.008582 | 2.035981556 | up         | hsa_circ_0069228_CBC1   |
| hsa_circ_0101180_CBC1   | 0.005562 | 2.03173148  | up         | hsa_circ_0117499_CBC1   |
| hsa_circ_0010992_CBC1   | 0.007319 | 2.808694123 | up         | hsa_circ_0010538_CBC1   |
| hsa_circ_0128506_CBC1   | 5.9E-05  | 2.321305428 | up         | hsa_circ_0083328_CBC1   |
| hsa_circ_0062841_CBC1   | 0.0061   | 2.147563114 | up         | hsa_circ_0126626_CBC1   |
| hsa_circ_0098274_CBC1   | 0.000554 | 2.412577415 | up         | hsa_circ_0115757_CBC1   |
| hsa_circ_0121264_CBC1   | 0.011414 | 2.17692387  | up         | hsa_circ_0009036_CBC1   |
| hsa_circ_0121598_CBC1   | 0.001885 | 2.071681178 | up         | hsa_circ_0134985_CBC1   |
| hsa-circRNA810-4_CBC1   | 0.029449 | 2.484362067 | up         | hsa_circ_0128058_CBC1   |
| hsa_circ_0119469_CBC1   | 0.01116  | 2.009871862 | up         | hsa_circ_0111391_CBC1   |
| hsa_circ_0054129_CBC1   | 0.001006 | 2.49772878  | up         | hsa_circ_0080952_CBC1   |
| hsa_circ_0051306_CBC1   | 0.00019  | 2.102600915 | up         | hsa_circ_0088329_CBC1   |
| hsa-circRNA5388-5_CBC1  | 0.003012 | 2.078769836 | up         | hsa_circ_0114797_CBC1   |
| hsa_circ_0102239_CBC1   | 0.010494 | 2.265609229 | up         | hsa_circ_0130488_CBC1   |
| hsa_circ_0122565_CBC1   | 0.000844 | 2.011996587 | up         | hsa_circ_0105010_CBC1   |
| hsa_circ_0099977_CBC1   | 0.003571 | 2.026424881 | up         | hsa_circ_0129104_CBC1   |
| hsa_circ_0040639_CBC1   | 0.007817 | 2.106413741 | up         | hsa_circ_0136904_CBC1   |
| hsa_circ_0052031_CBC1   | 0.032639 | 2.181262518 | up         | hsa_circ_0109310_CBC1   |
| hsa-circRNA9191-21_CBC1 | 0.000728 | 2.125687664 | up         | hsa-circRNA6510-1_CBC1  |
| hsa_circ_0036773_CBC1   | 0.000308 | 2.071840019 | up         | hsa_circ_0126693_CBC1   |
| hsa_circ_0095310_CBC1   | 0.001214 | 2.340261232 | up         | hsa_circ_0109314_CBC1   |
| hsa_circ_0102170_CBC1   | 0.049671 | 2.030599432 | up         | hsa-circRNA14588-10_CBC |
| hsa_circ_0074571_CBC1   | 0.009755 | 2.052714858 | up         | hsa_circ_0075043_CBC1   |
| hsa_circ_0093158_CBC1   | 0.011005 | 2.029571912 | up         | hsa_circ_0132137_CBC1   |
| hsa_circ_0035123_CBC1   | 0.018438 | 2.541242919 | up         | hsa_circ_0038434_CBC1   |
| hsa_circ_0133937_CBC1   | 0.001153 | 2.009375232 | up         | hsa_circ_0025977_CBC1   |
| hsa_circ_0117312_CBC1   | 0.00524  | 2.011365074 | up         | hsa_circ_0117264_CBC1   |
| hsa_circ_0124389_CBC1   | 0.008921 | 2.381507693 | up         | hsa_circ_0093710_CBC1   |
| hsa_circ_0052283_CBC1   | 0.031251 | 2.159410021 | up         | hsa_circ_0103333_CBC1   |
| hsa_circ_0104691_CBC1   | 0.00207  | 2.301995355 | up         | hsa-circRNA8505-38_CBC1 |
| hsa_circ_0018423_CBC1   | 0.009082 | 2.184349379 | up         | hsa_circ_0001481_CBC1   |
| hsa_circ_0083776_CBC1   | 0.002421 | 2.009678008 | up         | hsa_circ_0106175_CBC1   |
| hsa_circ_0010993_CBC1   | 0.000412 | 2.300353807 | up         | hsa_circ_0096651_CBC1   |
| hsa_circ_0035156_CBC1   | 0.02341  | 2.046739199 | up         | hsa_circ_0030811_CBC1   |

|                          |          |             |    |                         |
|--------------------------|----------|-------------|----|-------------------------|
| hsa_circ_0109884_CBC1    | 0.001085 | 2.087497689 | up | hsa_circ_0087214_CBC1   |
| hsa_circ_0082025_CBC1    | 0.001067 | 2.106546907 | up | hsa_circ_0099711_CBC1   |
| hsa_circ_0003562_CBC1    | 0.002618 | 2.053829228 | up | hsa-circRNA11806-28_CBC |
| hsa_circ_0077770_CBC1    | 0.012994 | 2.008946891 | up | hsa_circ_0099473_CBC1   |
| hsa_circ_0049995_CBC1    | 0.045987 | 2.868329028 | up | hsa_circ_0126210_CBC1   |
| hsa_circ_0094788_CBC1    | 0.008787 | 2.152524686 | up | hsa_circ_0045800_CBC1   |
| hsa-circRNA5273_CBC1     | 0.004387 | 2.037482259 | up | hsa-circRNA16072-34_CBC |
| hsa_circ_0124636_CBC1    | 0.022045 | 2.544396641 | up | hsa_circ_0078837_CBC1   |
| hsa-circRNA1257-28_CBC1  | 0.00036  | 2.175869008 | up | hsa-circRNA15259-13_CBC |
| hsa_circ_0133199_CBC1    | 0.022573 | 2.193108766 | up | hsa_circ_0108191_CBC1   |
| hsa_circ_0054633_CBC1    | 0.024097 | 2.377909196 | up | hsa_circ_0007709_CBC1   |
| hsa_circ_0095763_CBC1    | 0.033345 | 2.182123806 | up | hsa_circ_0030732_CBC1   |
| hsa_circ_0106442_CBC1    | 0.023753 | 2.041210033 | up | hsa_circ_0078178_CBC1   |
| hsa_circ_0122623_CBC1    | 0.02534  | 2.06665018  | up | hsa-circRNA4388-10_CBC1 |
| hsa-circRNA9102-60_CBC1  | 0.023401 | 2.070772185 | up | hsa_circ_0087212_CBC1   |
| hsa_circ_0093170_CBC1    | 0.035578 | 2.176181773 | up | hsa-circRNA427-19_CBC1  |
| hsa-circRNA9845-8_CBC1   | 0.006576 | 2.001826796 | up | hsa_circ_0067649_CBC1   |
| hsa-circRNA5149-6_CBC1   | 0.007994 | 2.156815687 | up | hsa_circ_0099822_CBC1   |
| hsa_circ_0094710_CBC1    | 0.020696 | 2.135694717 | up | hsa-circRNA14363-14_CBC |
| hsa_circ_0126977_CBC1    | 0.014419 | 2.009408872 | up | hsa_circ_0140081_CBC1   |
| hsa_circ_0047263_CBC1    | 0.012342 | 2.039163595 | up | hsa_circ_0071250_CBC1   |
| hsa-circRNA10710-18_CBC1 | 0.015364 | 3.208832259 | up | hsa_circ_0038424_CBC1   |
| hsa-circRNA5974-1_CBC1   | 0.040159 | 2.703035544 | up | hsa-circRNA11783-2_CBC1 |
| hsa_circ_0134121_CBC1    | 0.042415 | 2.05238185  | up | hsa_circ_0119915_CBC1   |
| hsa_circ_0082410_CBC1    | 0.032004 | 2.375855729 | up | hsa_circ_0003132_CBC1   |
| hsa-circRNA7603-4_CBC1   | 0.006714 | 2.152242294 | up |                         |
| hsa_circ_0044241_CBC1    | 0.010517 | 2.187052464 | up |                         |
| hsa_circ_0094757_CBC1    | 0.042232 | 2.091375238 | up |                         |
| hsa_circ_0088476_CBC1    | 0.027591 | 2.069240161 | up |                         |
| hsa_circ_0093731_CBC1    | 0.023243 | 2.120562206 | up |                         |
| hsa_circ_0112830_CBC1    | 0.034434 | 2.031539618 | up |                         |
| hsa_circ_0012158_CBC1    | 0.002071 | 2.025133271 | up |                         |
| hsa_circ_0115532_CBC1    | 0.021387 | 2.153342286 | up |                         |
| hsa_circ_0111612_CBC1    | 0.043589 | 2.174998689 | up |                         |
| hsa_circ_0103221_CBC1    | 0.036628 | 2.276566983 | up |                         |
| hsa_circ_0105688_CBC1    | 0.041466 | 2.275613913 | up |                         |
| hsa_circ_0125634_CBC1    | 0.037649 | 2.670597428 | up |                         |
| hsa_circ_0110718_CBC1    | 0.023501 | 2.123500711 | up |                         |
| hsa_circ_0015384_CBC1    | 0.008731 | 2.133436746 | up |                         |
| hsa_circ_0003067_CBC1    | 0.013544 | 2.051434345 | up |                         |
| hsa-circRNA4746-8_CBC1   | 0.040647 | 2.142408169 | up |                         |
| hsa_circ_0073291_CBC1    | 0.01654  | 2.081566052 | up |                         |
| hsa_circ_0106460_CBC1    | 0.048013 | 2.143576252 | up |                         |
| hsa-circRNA4314_CBC1     | 0.016172 | 2.247273933 | up |                         |
| hsa-circRNA1757-5_CBC1   | 0.001831 | 2.190238148 | up |                         |
| hsa-circRNA9806-2_CBC1   | 0.000233 | 2.177097473 | up |                         |
| hsa_circ_0025628_CBC1    | 0.013753 | 2.169223577 | up |                         |
| hsa_circ_0049807_CBC1    | 0.009284 | 2.359208833 | up |                         |
| hsa_circ_0138095_CBC1    | 0.012992 | 2.071745196 | up |                         |
| hsa_circ_0030682_CBC1    | 0.014389 | 2.268877469 | up |                         |



|                         |          |             |    |
|-------------------------|----------|-------------|----|
| hsa_circ_0120101_CBC1   | 0.003764 | 2.33418433  | up |
| hsa_circ_0117480_CBC1   | 0.005933 | 2.009720453 | up |
| hsa_circ_0106070_CBC1   | 0.011699 | 2.002505528 | up |
| hsa-circRNA905-3_CBC1   | 0.000502 | 2.029750579 | up |
| hsa_circ_0048532_CBC1   | 0.023218 | 2.090300437 | up |
| hsa_circ_0047680_CBC1   | 0.004182 | 2.409030854 | up |
| hsa_circ_0126850_CBC1   | 0.004438 | 2.270157216 | up |
| hsa_circ_0100136_CBC1   | 0.007116 | 2.06606637  | up |
| hsa_circ_0049485_CBC1   | 0.010284 | 2.368658772 | up |
| hsa_circ_0007849_CBC1   | 3.92E-05 | 2.066038997 | up |
| hsa_circ_0069723_CBC1   | 0.026516 | 2.03263279  | up |
| hsa-circRNA4855-2_CBC1  | 0.000711 | 2.08831375  | up |
| hsa_circ_0082081_CBC1   | 0.018948 | 2.488053473 | up |
| hsa_circ_0011285_CBC1   | 0.028233 | 2.078329113 | up |
| hsa_circ_0095667_CBC1   | 0.003426 | 2.005686384 | up |
| hsa_circ_0139110_CBC1   | 0.038496 | 2.171493491 | up |
| hsa_circ_0093781_CBC1   | 0.002071 | 2.122123825 | up |
| hsa_circ_0068879_CBC1   | 0.004026 | 2.345041135 | up |
| hsa_circ_0032850_CBC1   | 0.000722 | 2.371651954 | up |
| hsa_circ_0105486_CBC1   | 0.013992 | 2.076075123 | up |
| hsa_circ_0079753_CBC1   | 0.000438 | 2.008890154 | up |
| hsa_circ_0097816_CBC1   | 4.92E-05 | 2.095803508 | up |
| hsa_circ_0116926_CBC1   | 0.003063 | 3.078579348 | up |
| hsa_circ_0066857_CBC1   | 0.001734 | 2.085880305 | up |
| hsa_circ_0092576_CBC1   | 0.037506 | 2.377611387 | up |
| hsa_circ_0133936_CBC1   | 0.003693 | 2.351895709 | up |
| hsa_circ_0062596_CBC1   | 0.018376 | 3.137173261 | up |
| hsa_circ_0136529_CBC1   | 0.015736 | 2.3139417   | up |
| hsa_circ_0139145_CBC1   | 0.028825 | 2.022197686 | up |
| hsa_circ_0062839_CBC1   | 0.00327  | 2.073265251 | up |
| hsa_circ_0074720_CBC1   | 0.047034 | 2.003609905 | up |
| hsa-circRNA11759-7_CBC1 | 0.042928 | 2.03710257  | up |
| hsa_circ_0130831_CBC1   | 0.009261 | 2.037314271 | up |
| hsa-circRNA6053-3_CBC1  | 0.044562 | 2.389274827 | up |
| hsa_circ_0067053_CBC1   | 0.001943 | 2.192211956 | up |
| hsa_circ_0023573_CBC1   | 0.014873 | 2.316499568 | up |
| hsa_circ_0057699_CBC1   | 0.04688  | 2.606352429 | up |
| hsa_circ_0136077_CBC1   | 0.029181 | 2.181367341 | up |
| hsa_circ_0037118_CBC1   | 0.002848 | 2.433619175 | up |
| hsa_circ_0054663_CBC1   | 0.038466 | 2.08966537  | up |
| hsa-circRNA11777-9_CBC1 | 0.001298 | 2.044725583 | up |
| hsa-circRNA10251-2_CBC1 | 0.000104 | 2.067433674 | up |
| hsa_circ_0091427_CBC1   | 0.011876 | 2.180037904 | up |
| hsa_circ_0035125_CBC1   | 0.022637 | 2.197673436 | up |
| hsa_circ_0137009_CBC1   | 0.043984 | 2.065151111 | up |
| hsa_circ_0121026_CBC1   | 0.044969 | 2.016154821 | up |
| hsa_circ_0047752_CBC1   | 0.002957 | 2.0288086   | up |
| hsa-circRNA13247-1_CBC1 | 0.049468 | 2.343046615 | up |
| hsa_circ_0077821_CBC1   | 0.000368 | 2.359767055 | up |

## Combination group.

| <i>P</i> value | Fold change | Expression |
|----------------|-------------|------------|
| 0.011433       | 2.3605688   | down       |
| 0.013118       | 2.050815403 | down       |
| 0.000105       | 2.009597861 | down       |
| 0.037689       | 2.538887198 | down       |
| 0.009994       | 2.195209912 | down       |
| 0.03442        | 2.208018633 | down       |
| 0.022347       | 2.176208521 | down       |
| 0.031476       | 2.198079087 | down       |
| 0.030543       | 2.331714602 | down       |
| 0.040857       | 2.03950605  | down       |
| 0.018933       | 2.008209821 | down       |
| 0.005139       | 2.351457682 | down       |
| 0.014367       | 2.314173883 | down       |
| 0.004036       | 2.565017527 | down       |
| 0.043148       | 2.067282959 | down       |
| 0.000721       | 2.43355519  | down       |
| 0.003468       | 2.056223313 | down       |
| 0.004818       | 2.260273969 | down       |
| 0.01686        | 2.068990593 | down       |
| 0.029441       | 2.210412519 | down       |
| 0.000439       | 2.309744421 | down       |
| 0.015459       | 2.423257538 | down       |
| 0.006971       | 2.78944472  | down       |
| 0.016497       | 2.210600082 | down       |
| 0.04317        | 2.78209257  | down       |
| 0.040762       | 2.136575278 | down       |
| 0.004545       | 2.166140845 | down       |
| 1.78E-06       | 2.074059039 | down       |
| 0.033519       | 2.06578416  | down       |
| 0.014719       | 2.741073757 | down       |
| 0.003064       | 2.240005564 | down       |
| 0.03536        | 2.90549434  | down       |
| 0.001805       | 2.286283814 | down       |
| 0.019399       | 2.171933693 | down       |
| 0.022593       | 2.102030628 | down       |
| 0.009749       | 2.055402975 | down       |
| 0.026082       | 2.252257854 | down       |
| 0.000707       | 2.178954594 | down       |
| 0.009537       | 2.048313348 | down       |
| 0.003914       | 2.02996528  | down       |
| 0.0228         | 2.596917669 | down       |
| 0.016306       | 2.02084182  | down       |
| 0.030486       | 2.1516764   | down       |
| 0.005491       | 2.031315653 | down       |
| 0.038345       | 3.765492492 | down       |
| 0.01834        | 2.045198502 | down       |
| 0.035895       | 2.082102271 | down       |
| 0.031956       | 2.508047272 | down       |

|          |             |      |
|----------|-------------|------|
| 0.013086 | 2.013634184 | down |
| 0.028518 | 2.161528412 | down |
| 0.001143 | 2.149935585 | down |
| 0.015392 | 2.066923726 | down |
| 0.041558 | 2.015297694 | down |
| 0.047408 | 2.110993041 | down |
| 0.008494 | 2.292375135 | down |
| 0.026825 | 2.140403466 | down |
| 0.014333 | 2.390303109 | down |
| 0.005018 | 2.229978809 | down |
| 0.00979  | 2.261823359 | down |
| 0.00294  | 2.096251262 | down |
| 0.014084 | 2.143165478 | down |
| 0.013385 | 2.053546344 | down |
| 0.004461 | 2.111546796 | down |
| 0.028091 | 2.158894619 | down |
| 0.004743 | 2.827014075 | down |
| 0.03392  | 2.02078429  | down |
| 0.008583 | 2.044235799 | down |
| 0.027278 | 2.024636077 | down |
| 0.022792 | 2.332626288 | down |
| 0.002224 | 2.52956452  | down |
| 0.001632 | 2.605909533 | down |
| 0.021732 | 3.054921641 | down |
| 0.049196 | 2.089023816 | down |
